# Supplementary material for: iPhemap: an atlas of phenotype to genotype relationships of human iPSC models of neurological diseases
Source: PubMed Central journal article supplement (PMC5731211; doi:10.15252/emmm.201708191), 2017-10-19
Supplement: EMMM-9-1742-s001.pdf [file EMMM-9-1742-s001.pdf]

# Appendix

## **iPhemap: An atlas of phenotype to genotype relationships of human iPSC models of neurological diseases**

Ethan W. Hollingsworth<sup>1,2</sup>, Jacob E. Vaughn<sup>1,2</sup>, Josh C. Orack<sup>1,2</sup>, Chelsea Skinner<sup>1,2</sup>, Jamil Khouri<sup>1,2</sup>, Sofia B. Lizarraaga<sup>3</sup>, Mark E. Hester<sup>4</sup>, Fumihiko Watanabe<sup>1</sup>, Kenneth S. Kosik<sup>5</sup> and Jaime Imitola<sup>1,2,6</sup>

### **Table of Contents**

**1. Appendix Figures S1 to S9**

**2. Appendix Tables S1 to S12**

A

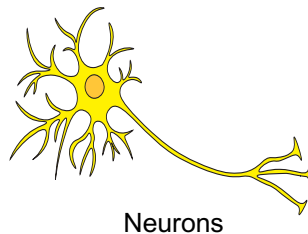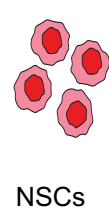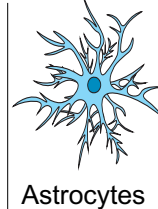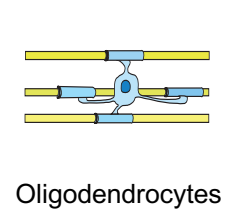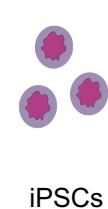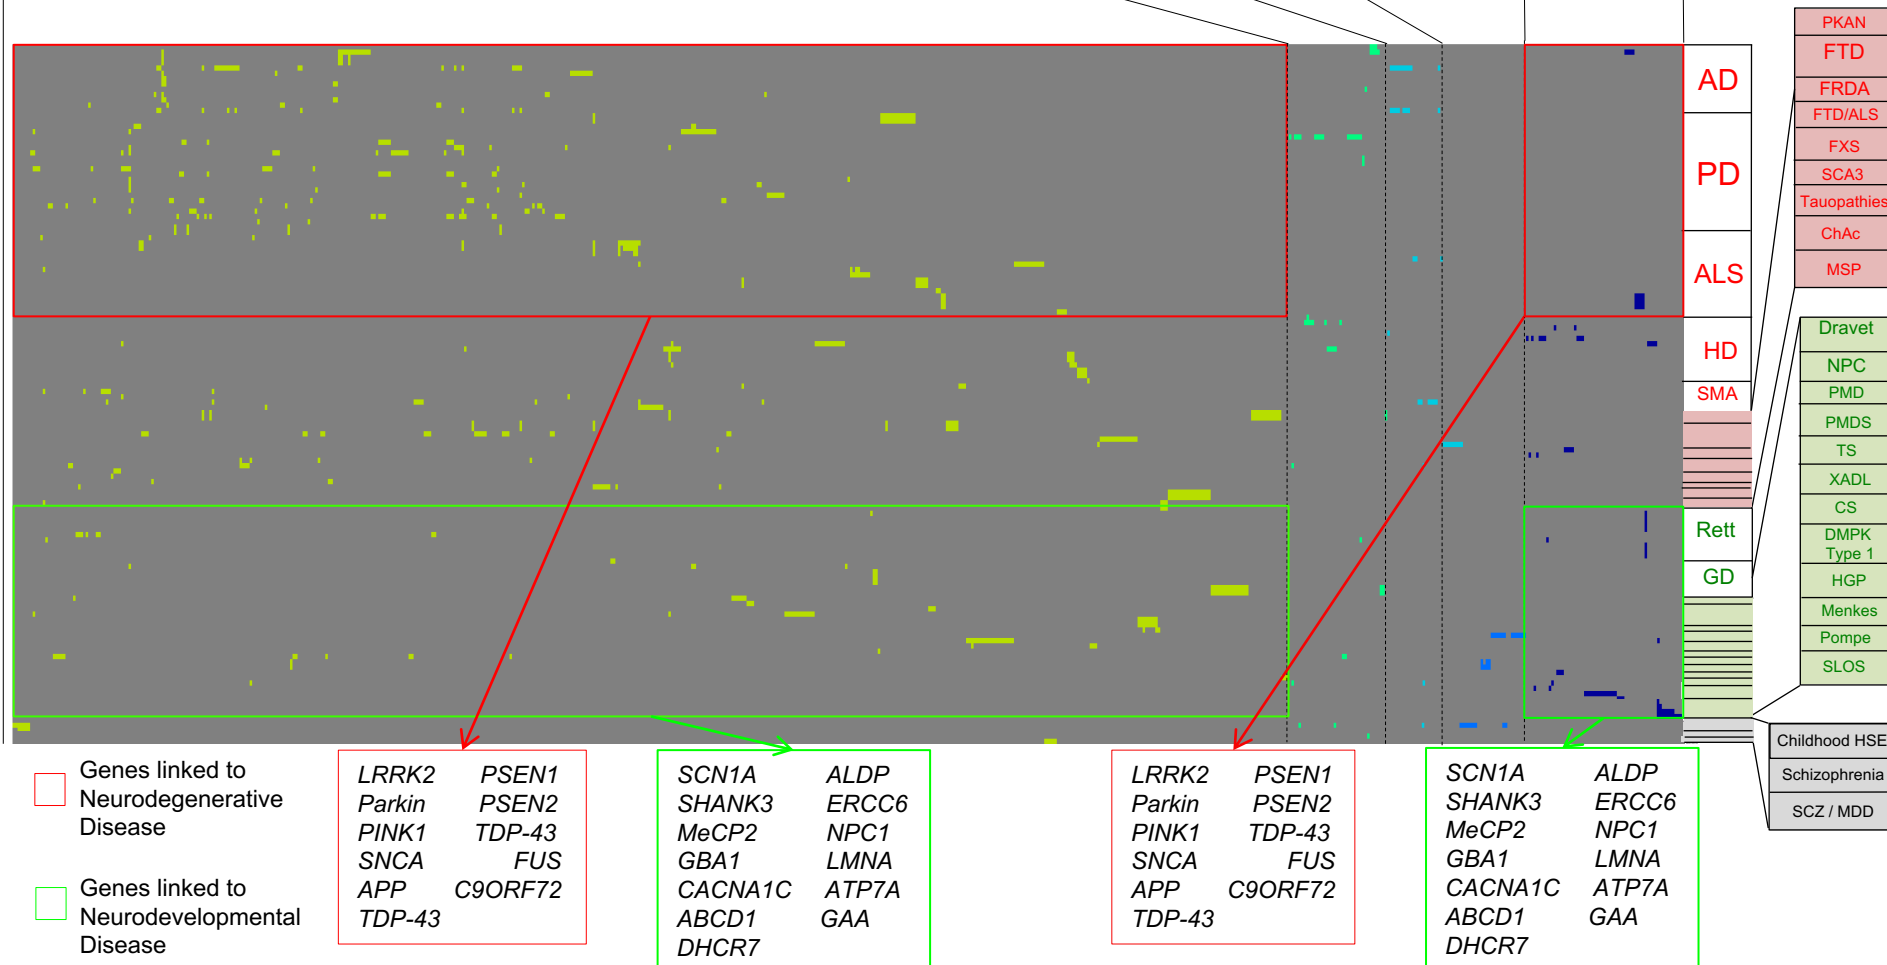

**Appendix Figure S1.** Heatmap of the relationship between phenotypes and developmental stages *in vitro*. Colored boxes denote the relationship of similar genes at stages of differentiation. Phenotypes are in the X-axis and disease abbreviations are on the Y-axis, grouped by their disease category: neurodegenerative (red) neurodevelopmental (green), and viral-induced and psychiatric (black). The majority of phenotypes reported in neurodegenerative diseases were in mature cell types, while phenotypic abnormalities were observed through all cell types in genes linked to neurodevelopmental disorders. Quantifications can be found in **Figure 4** and a full table of phenotypes, organized from left to right, in **Appendix Table S4**.

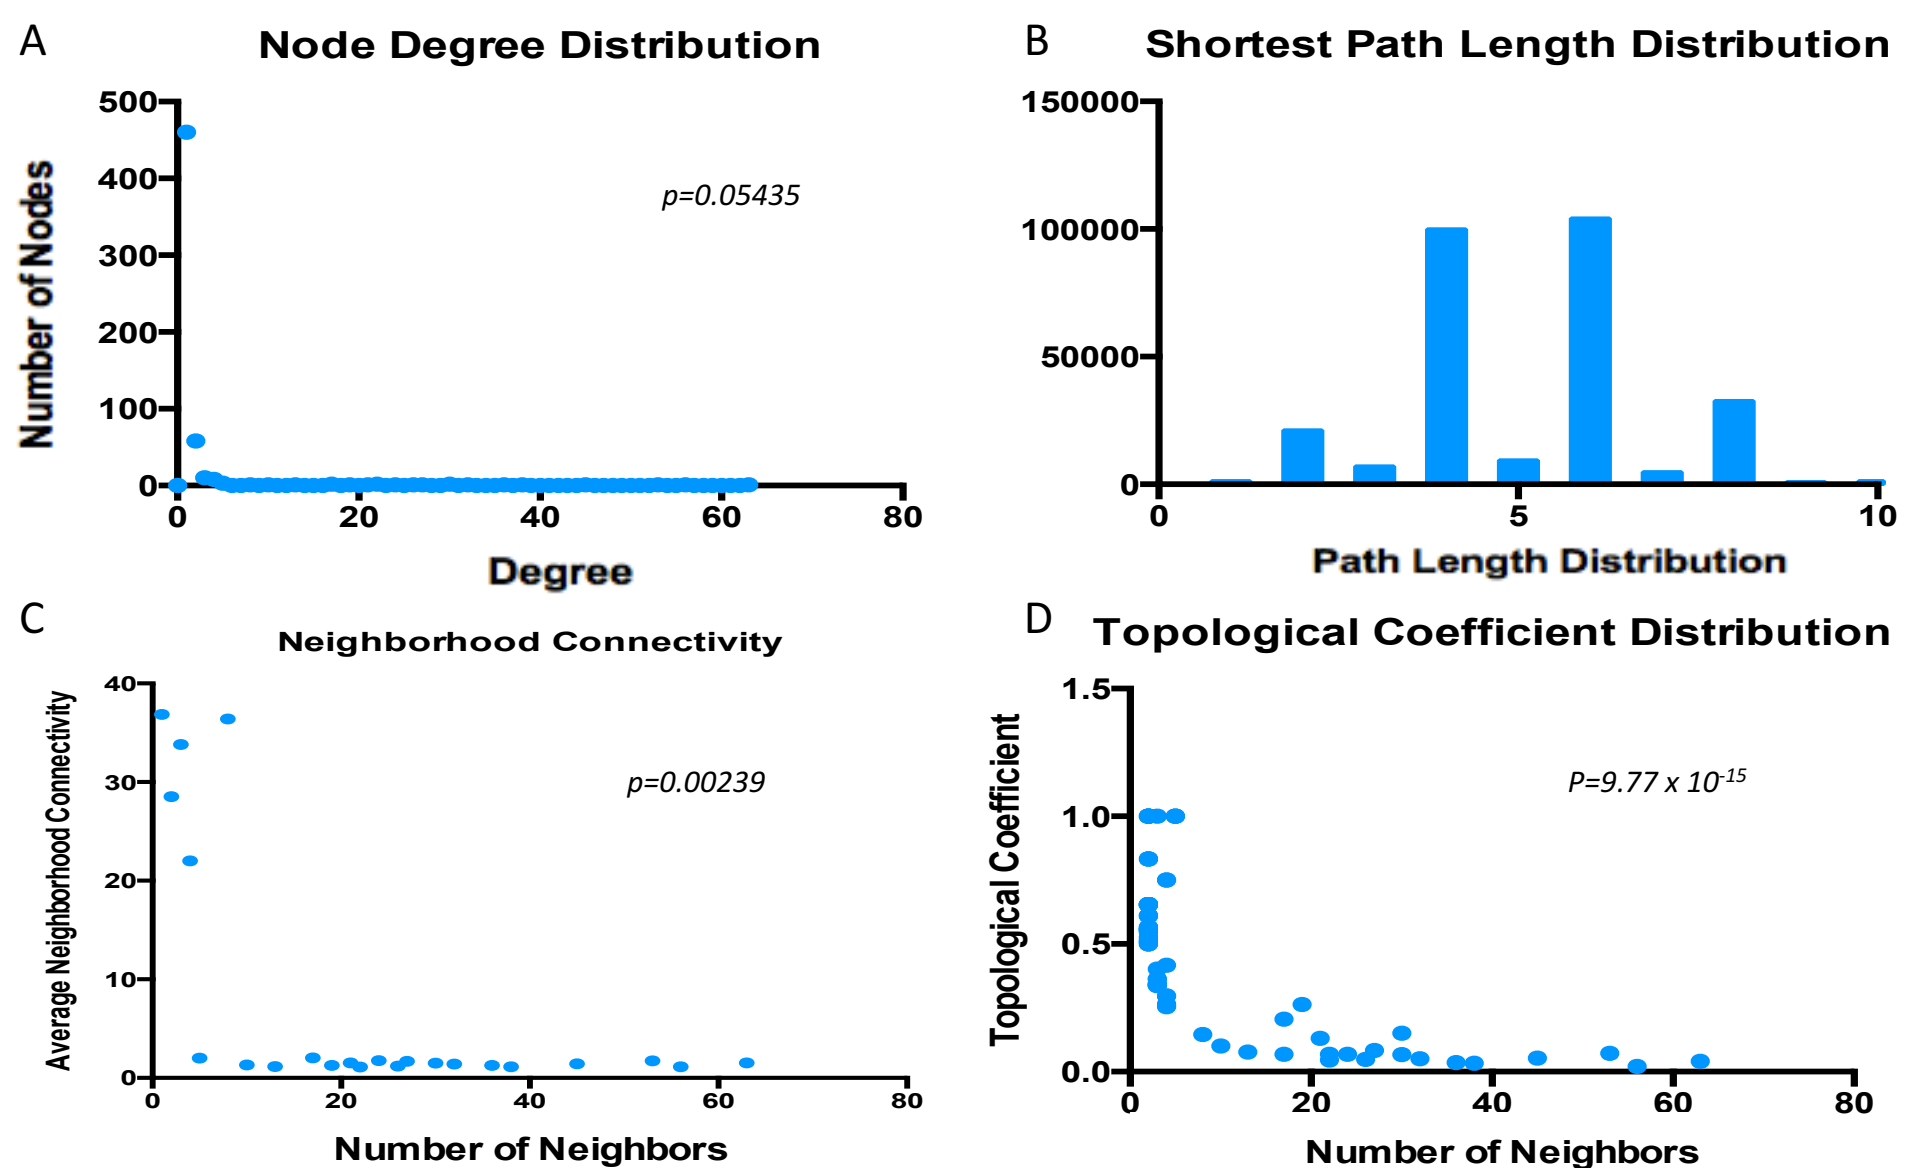

**Appendix Figure S2. Statistical pathway analysis of overlapping phenogenetic network.** **A)** Node degree distribution plot of overlapping network. Fitting these data with a power-law distribution returned the fitted line equation,  $y=53.358x^{-1.163}$ , with the following statistical parameters:  $R^2 = 0.717$  and  $r= 0.922$ , which suggests that this network is in accord with a scale-free network ( $n=64$ ,  $F(1,62)=3.85$ ). **B)** Shortest path length distribution plot illustrating the smallest number of phenotypes between genes. **C)** Neighborhood connectivity ( $n=23$ ,  $F(1,21)=11.91$ ) and **D)** Topological coefficient distribution ( $n=100$ ,  $F(1,98)=70.71$ ) are both statistically significant for a power-law distribution, which demonstrates that a majority of phenotypes are distinct to a single gene within the network.

# 2017 Patient-Derived iPSC Phenogenetic Map

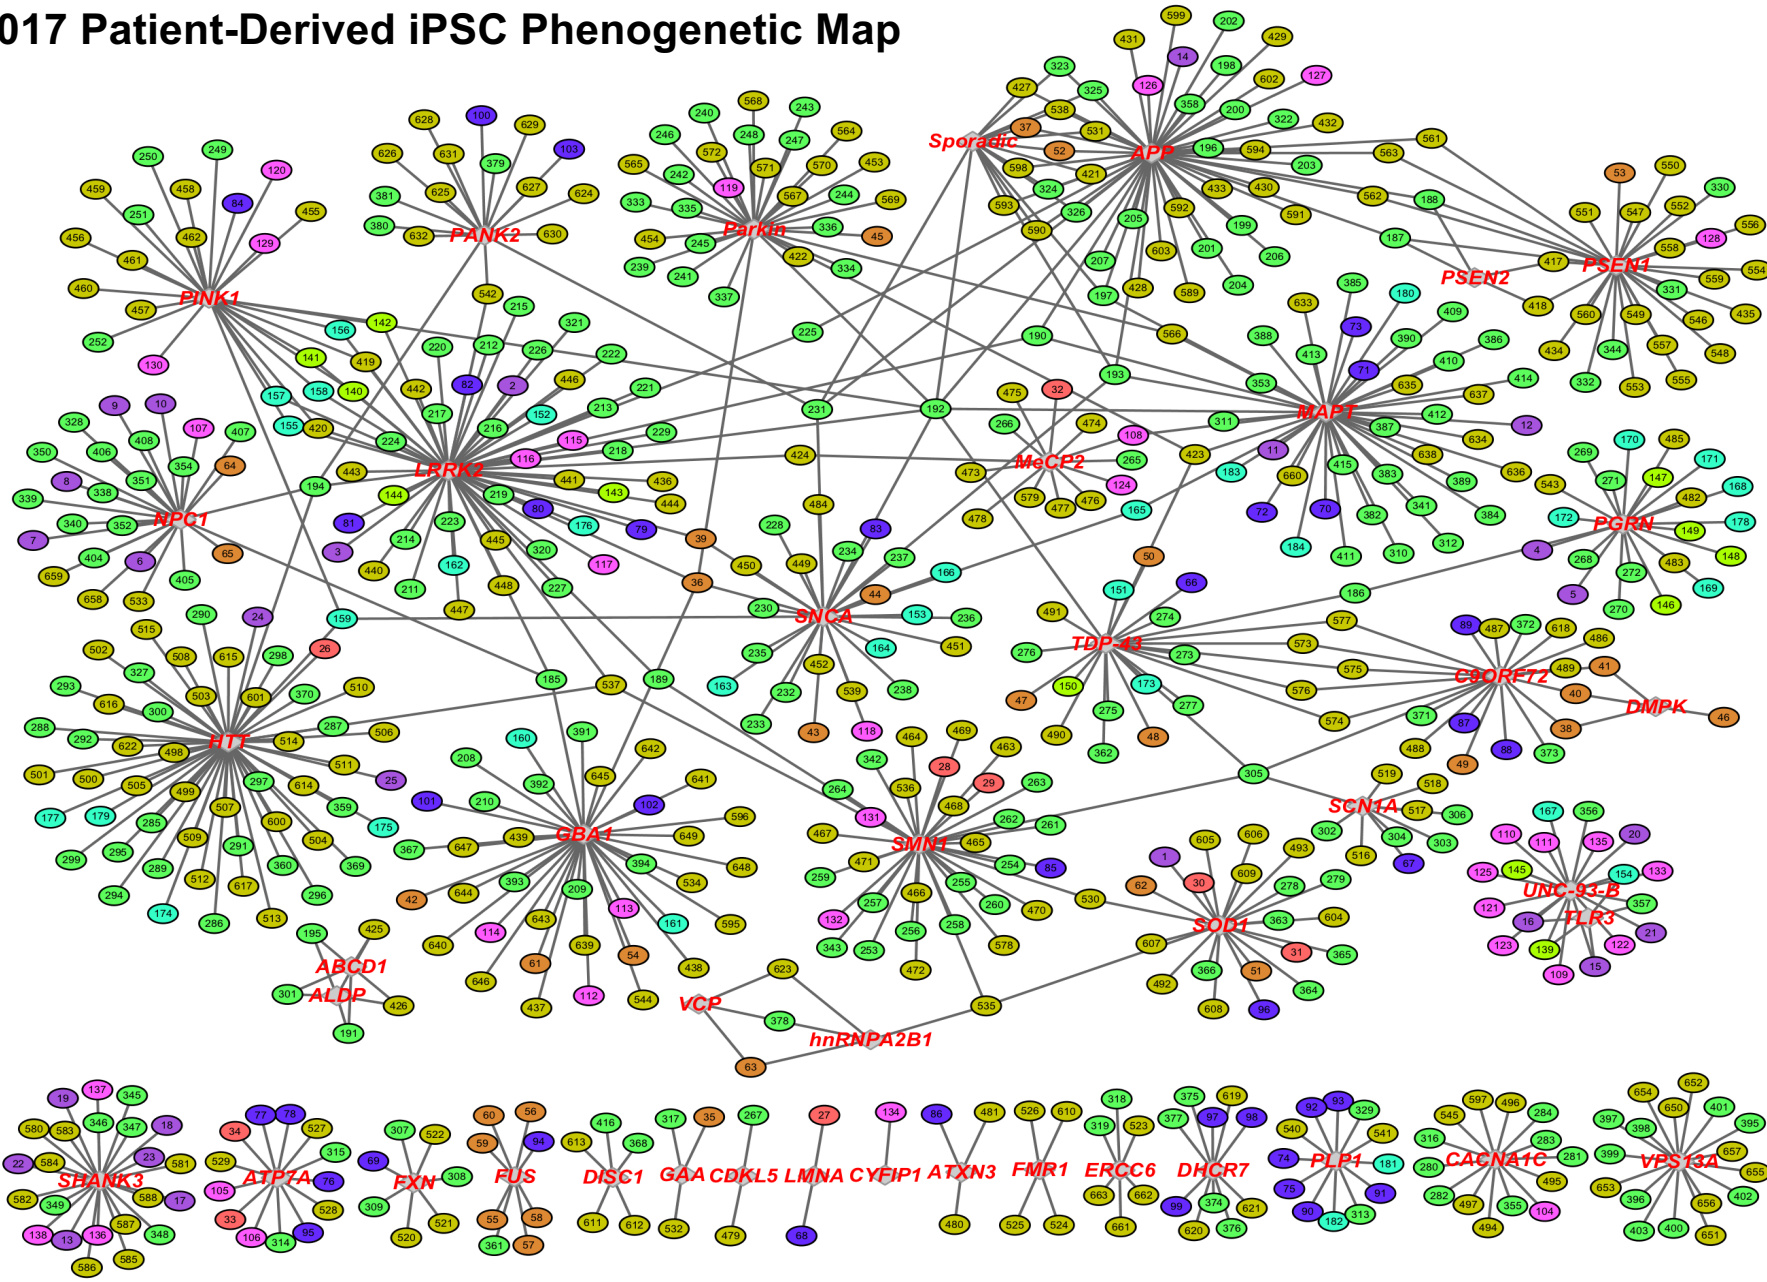

**Appendix Figure S3.** Extended patient-derived iPSC phenogenetic map version 2017, including non-overlapping genes. Phenotypes are colored by taxonomy described in **Figure EV2** and identifying numbers of each phenotype are listed in **Appendix Table S10**. This extended network view was generated through the same method of analysis as **Figure 5**.

Phenogenetic Correspondence

iPSCs

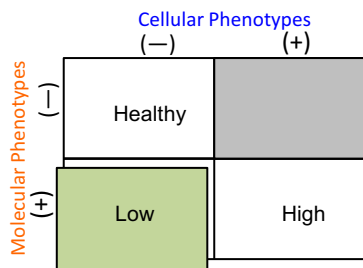

**Appendix Figure S4A-D. Phenogenetic correspondence of iPSCs.** The treemap view illustrates the correspondence of cellular to molecular phenotypes from iPSCs. Low phenogenetic correspondence, characterized by the absence of cellular phenotypes, was noted for the downregulated and upregulated functional annotations of iPSCs with mutations in **A-D) LRRK2** and **SNCA**.

**A** Downregulated Functional Annotations of *LRRK2* iPSCs

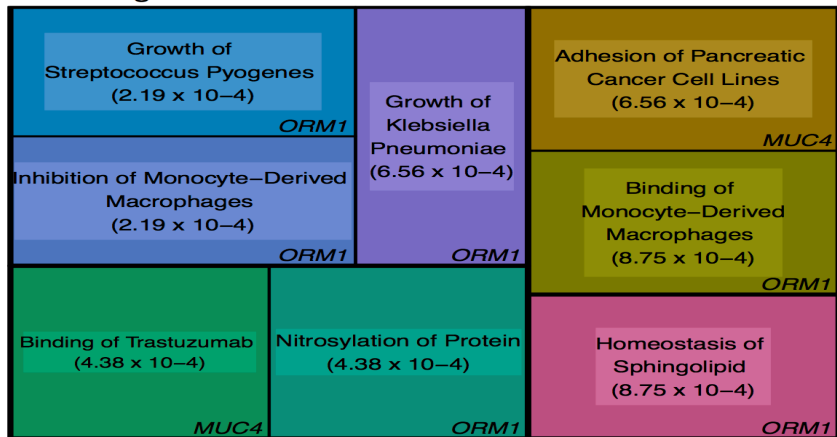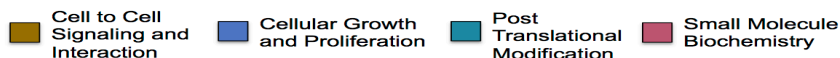

**B** Upregulated Functional Annotations of *LRRK2* iPSCs

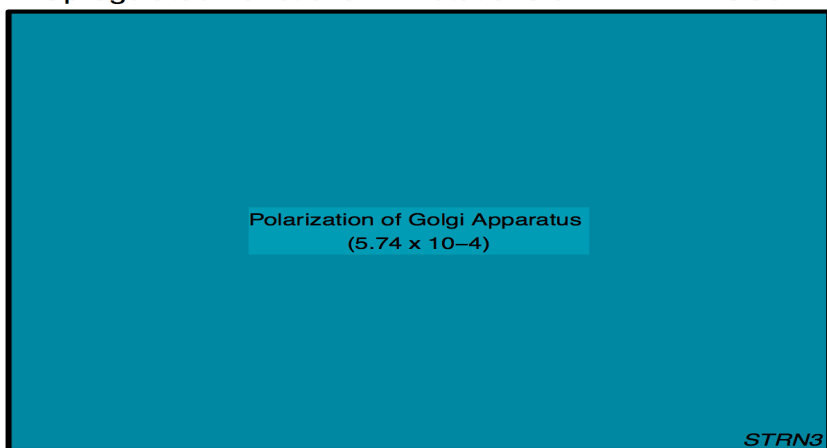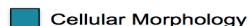

**C** Downregulated Functional Annotations of *SNCA* iPSCs

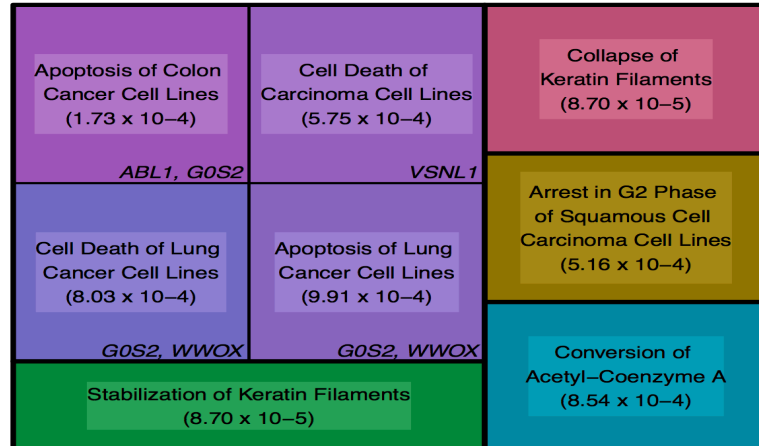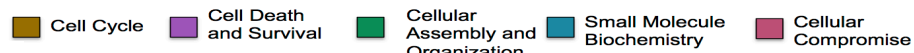

**D** Upregulated Functional Annotations from *SNCA* iPSCs

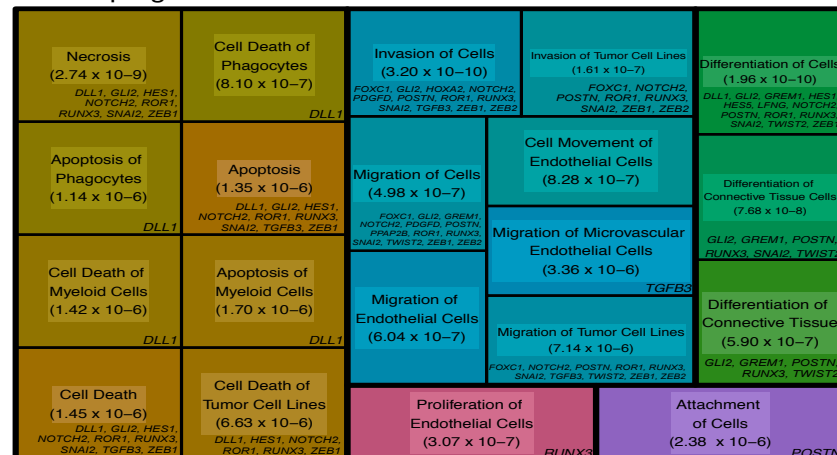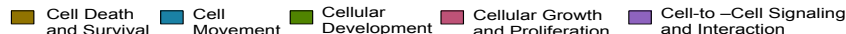

## Phenogenetic Correspondence

iPSCs

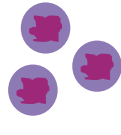

Molecular Phenotypes

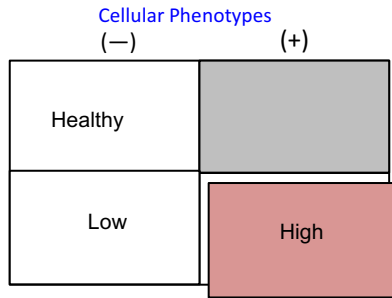

**Appendix Figure S4E-J. Phenogenetic correlation of iPSCs.** The treemap view illustrates the correlation of cellular to molecular phenotypes from iPSCs. **E-F)** Downregulated and upregulated functional annotations of iPSCs with mutations in *FXN*. Altered expression of *DLK1*, *GDF15*, and *IGFBP7*, which are critical to motor neuron function<sup>9-11</sup>, was found in these cells. iPSCs with mutant **G-H)** *ERCC6* and **I-J)** *HTT* show abnormalities in expression of genes related to migration, like *CXCR4* (middle), and genes involved in cytokinesis and cell viability (right), respectively. These molecular changes are indicative of high phenogenetic correspondence.

### E Downregulated Functional Annotations of *FXN* iPSCs

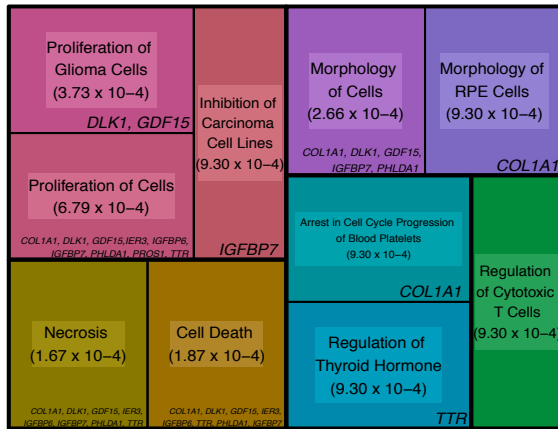

Cell Morphology Cell Death and Survival Cellular Function and Maintenance Cellular Growth and Proliferation Other

### G Downregulated Functional Annotations of *ERCC6* iPSCs

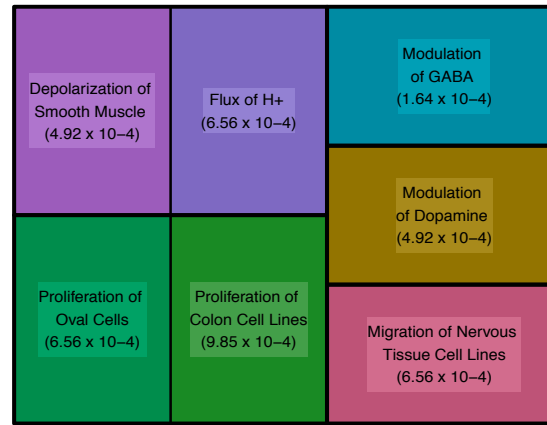

Cell to Cell Signaling and Interaction Cellular Function and Maintenance Cellular Growth and Proliferation Cellular Movement Small Molecule Biochemistry

### I Downregulated Functional Annotations of *HTT* iPSCs

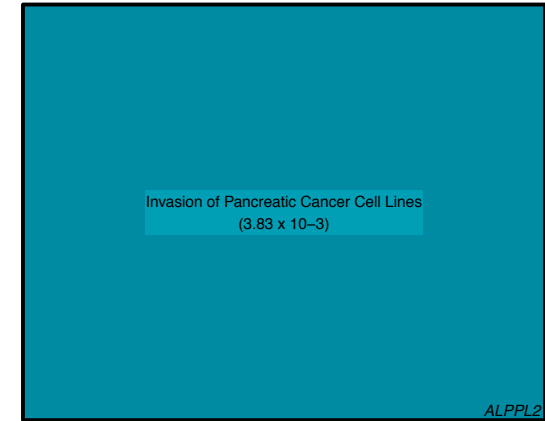

Cellular Movement

### F Upregulated Functional Annotations of *FXN* iPSCs

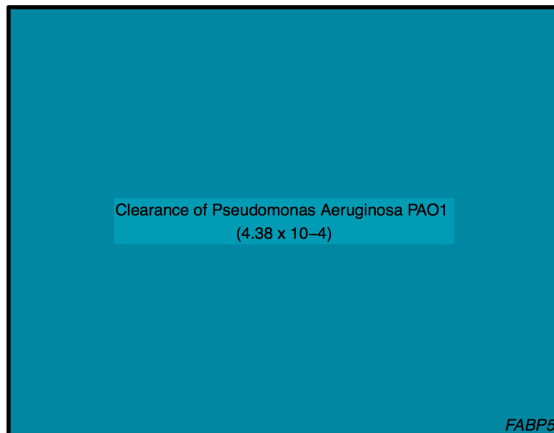

Cell Death and Survival

### H Upregulated Functional Annotations of *ERCC6* iPSCs

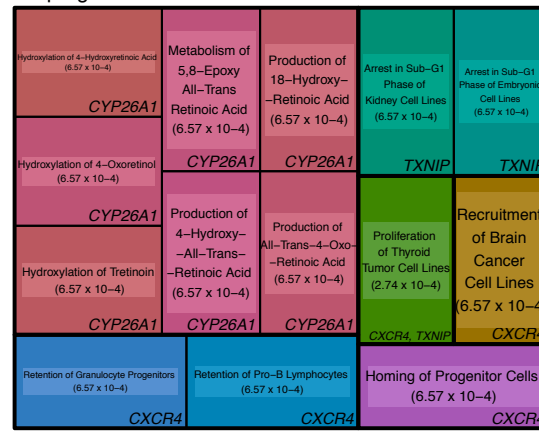

Cellular Function and Maintenance Cell to Cell Signaling and Interaction Cell Cycle Cellular Growth and Proliferation Small Molecule Biochemistry Cellular Movement

### J Upregulated Functional Annotations of *HTT* iPSCs

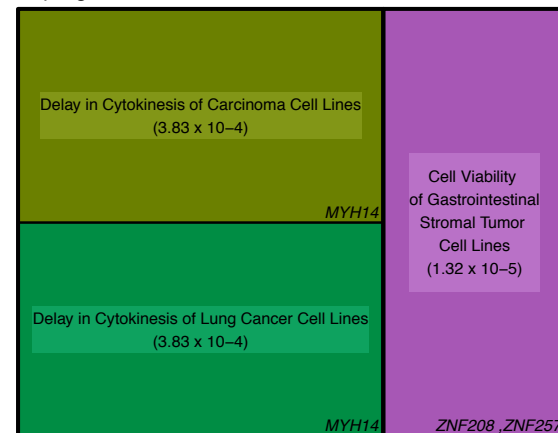

Cell Cycle Cell Death and Survival

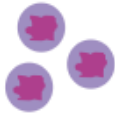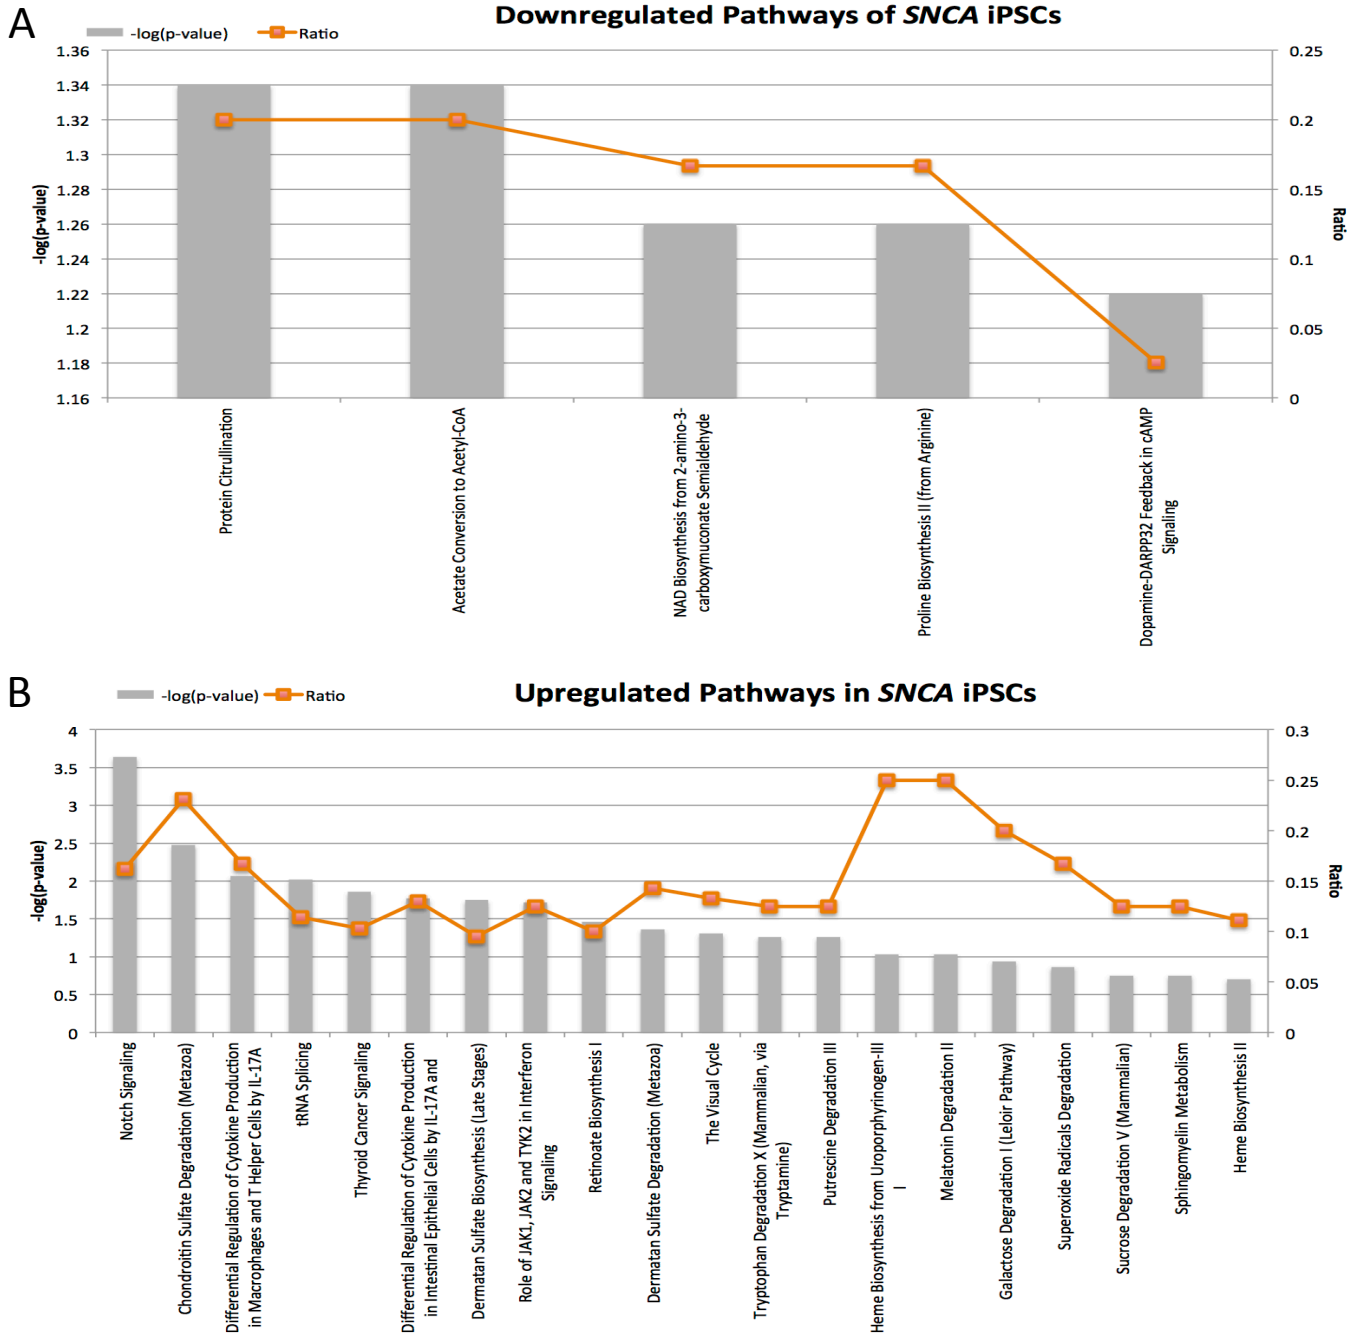

**Appendix Figure S5A, B.** Extended molecular profile data of iPSCs containing *SNCA* mutation with **A)** downregulation of molecular pathways, such as dopamine signaling, and **B)** upregulation of metabolic pathways and Notch signaling, as seen in the treemaps of **Appendix Figure S4C, D.**

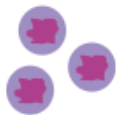

C

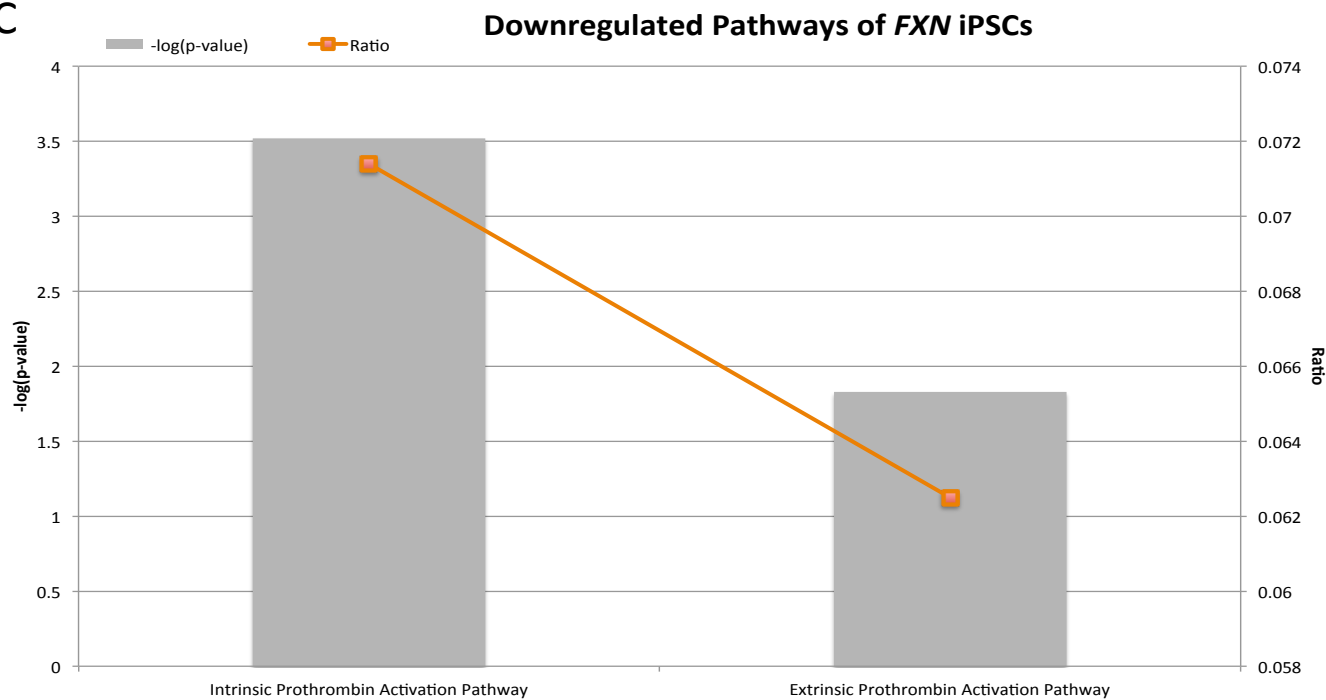

D

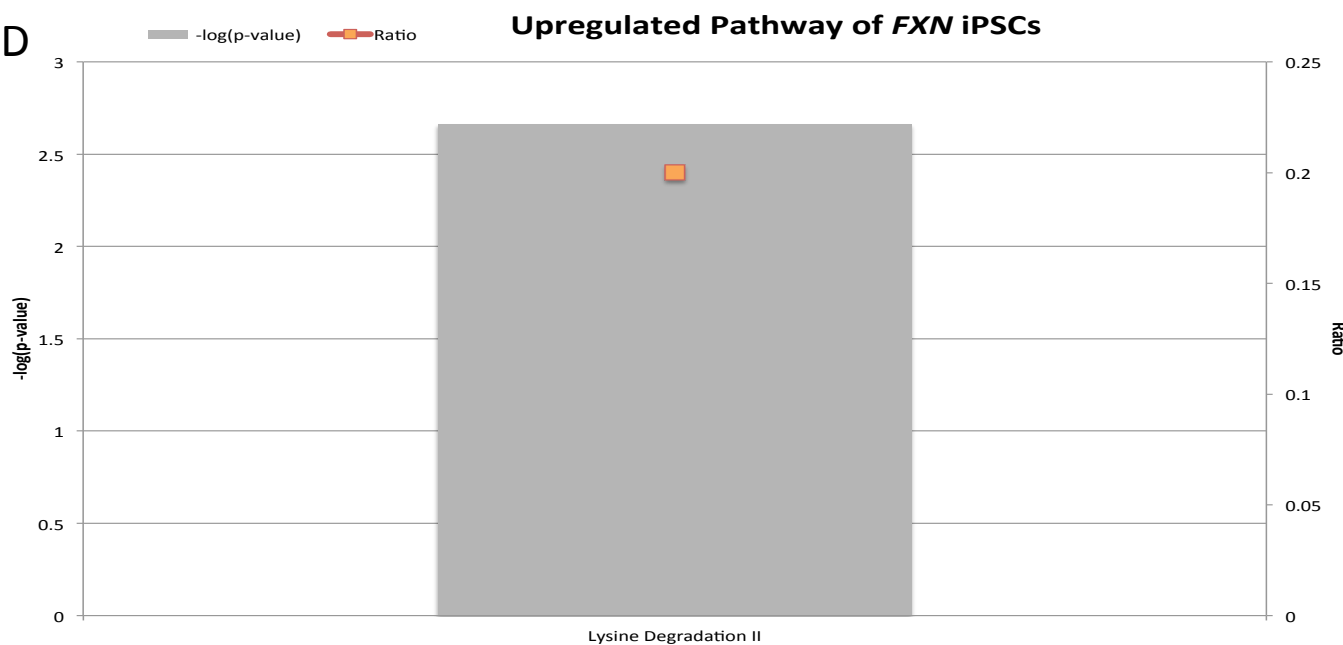

**Appendix Figure S5C, D.** Extended molecular profile data of iPSCs containing *FXN* mutations with **C**) downregulation of thrombin activation signaling pathways, and **D**) upregulation of amino acid catabolic pathway, as seen in **Appendix Figure S4E, F**.



# NSCs

## Phenogenetic Correspondence

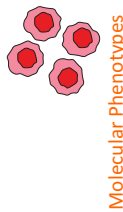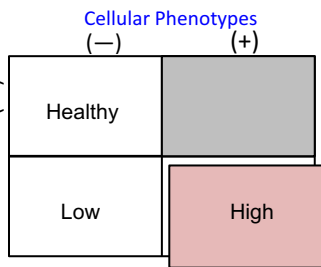

**Appendix Figure S6. Phenogenetic correlation of NSCs.** In this treemap view, high phenogenetic correlation was established for NSCs with mutations in *LRRK2*. **A)** Upregulated functional annotations of these cells show increased expression of genes associated with nitric oxide process and apoptosis. **B)** Downregulated functional annotations indicate dysregulation of neural progenitor processes, with a decrease in *NR2E1*, *PLP1*, and *PAX6*, which are all involved in neurogenesis and NSC self-renewal<sup>12-14</sup>.

## Downregulated Functional Annotations of *LRRK2* NSCs

**A**

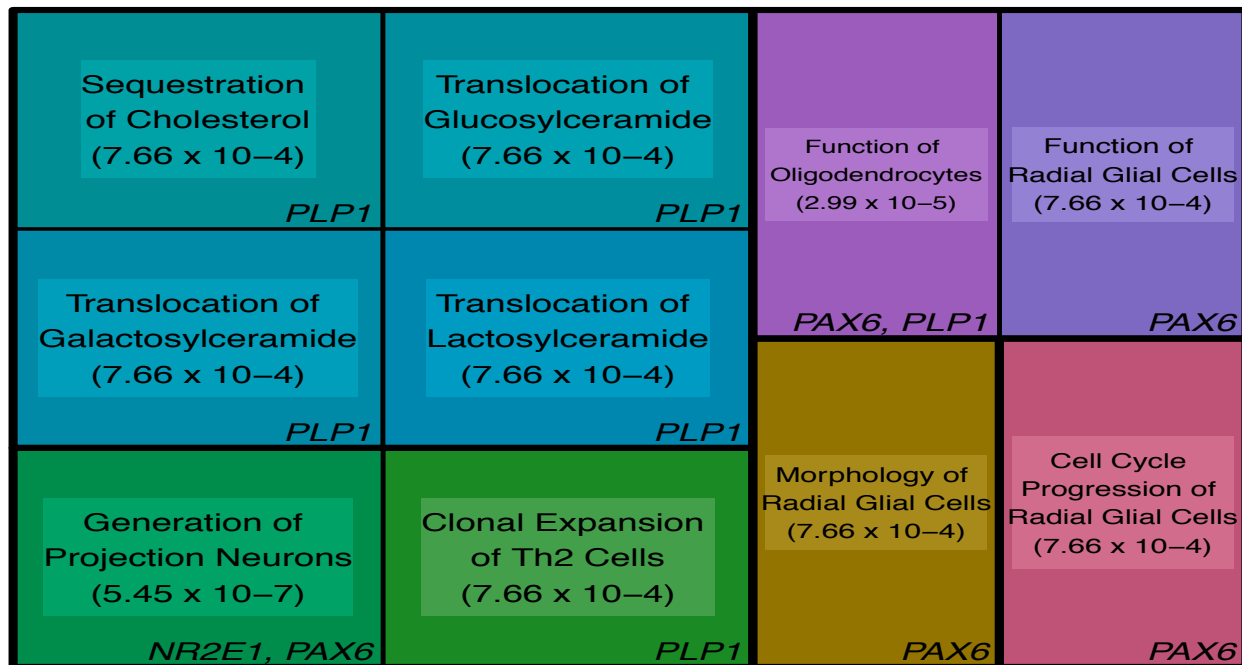

**B**

■ Cellular Growth and Proliferation  
 ■ Small Molecule Biochemistry  
 ■ Cell Cycle  
 ■ Cell Morphology  
 ■ Cellular Function and Maintenance

## Upregulated Functional Annotations from *LRRK2* NSCs

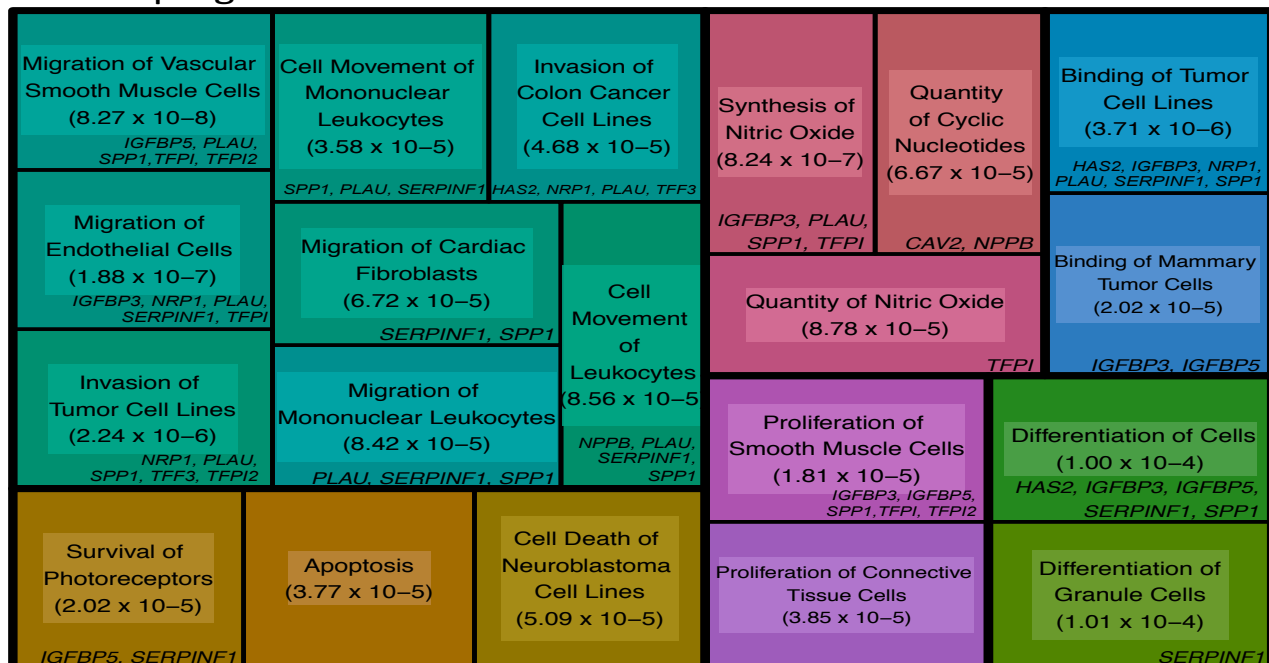

■ Cell-to-Cell Signaling and Interaction  
 ■ Small Molecule Biochemistry  
 ■ Cell Movement  
■ Cell Death and Survival  
 ■ Cellular Growth and Proliferation  
 ■ Cellular Development

# NSCs

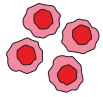

■ -log(p-value)

■ Ratio

## Upregulated Pathway of *LRRK2* NSCs

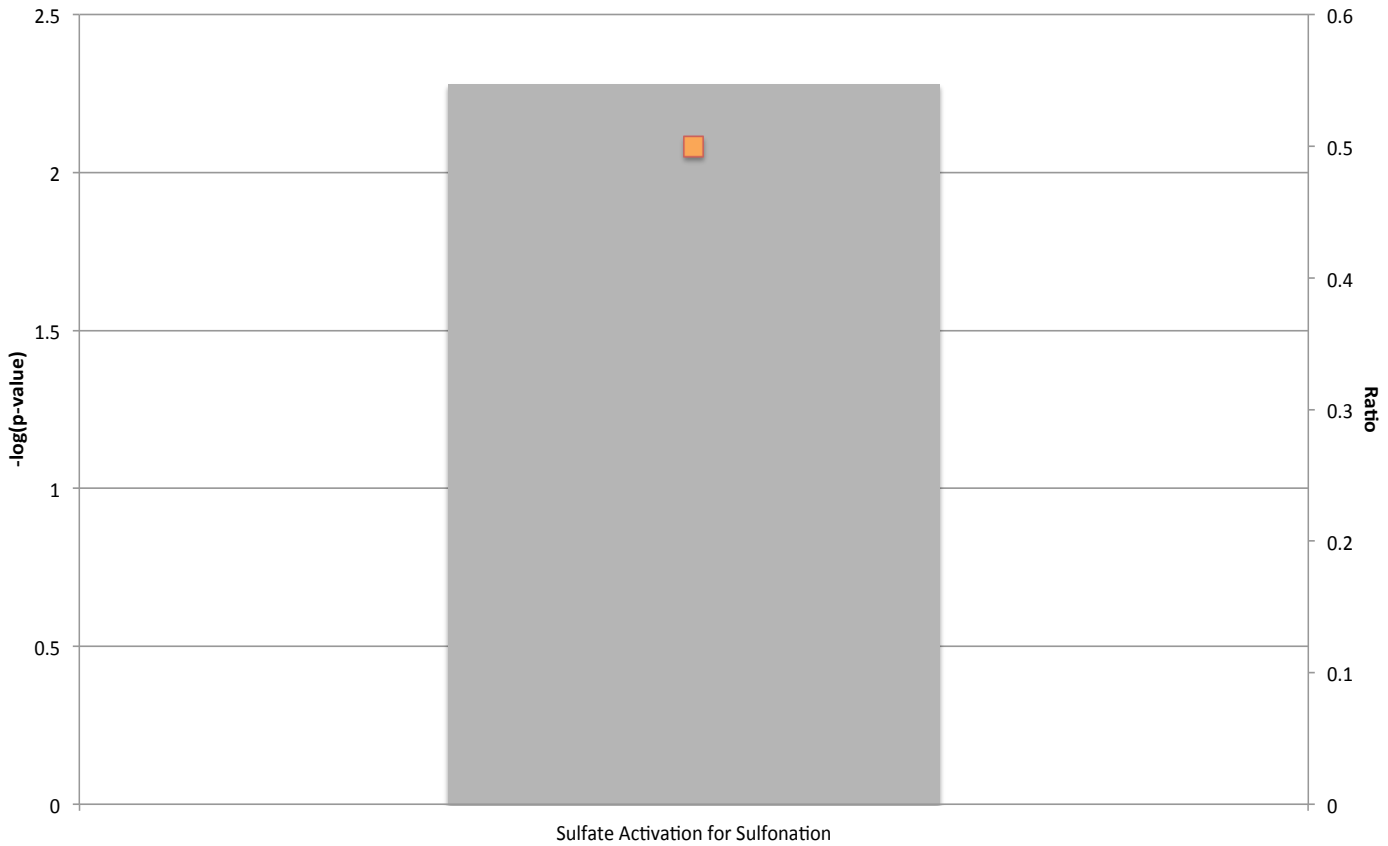

**Appendix Figure S7.** Extended molecular profile data of NSCs containing mutant *LRRK2* with upregulation of a post-translational modification pathway, induced by transcriptional dysregulation as featured in treemaps of **Appendix Figure S6**.

# Neurons

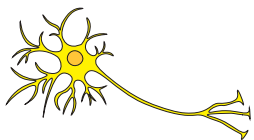

A

## Upregulated Pathways of *DISC1* Neurons

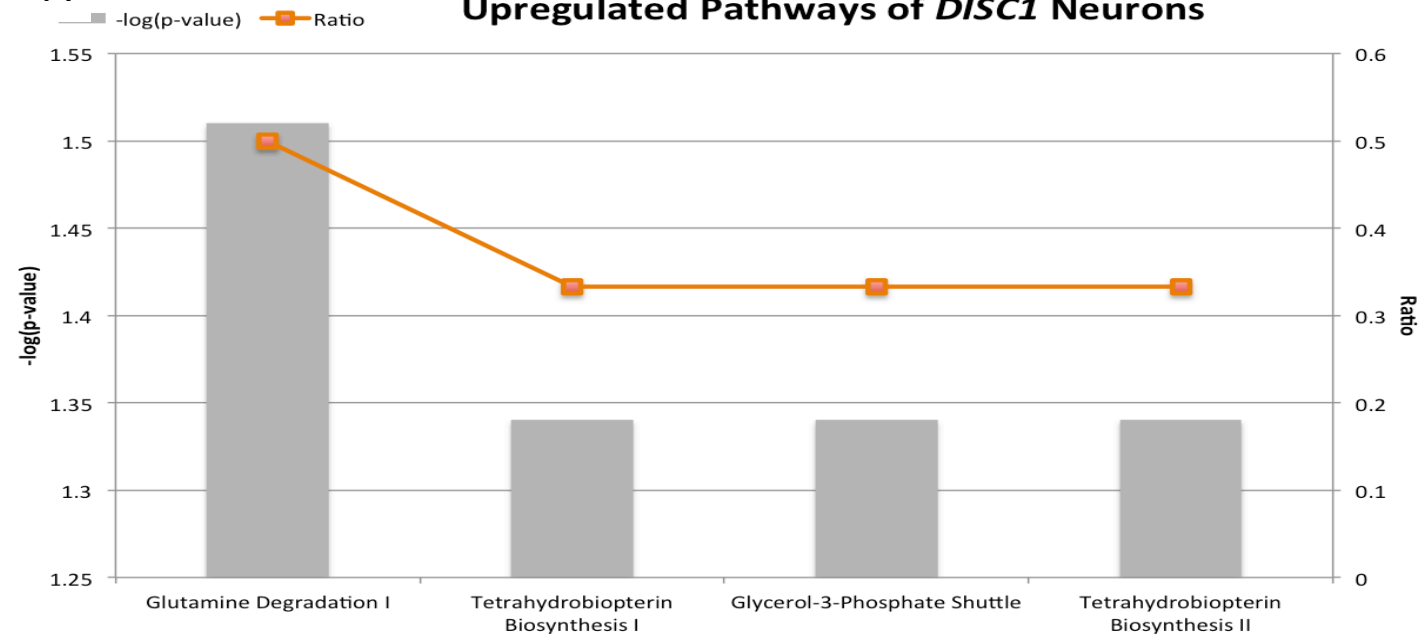

B

## Downregulated Pathways of *DISC1* Neurons

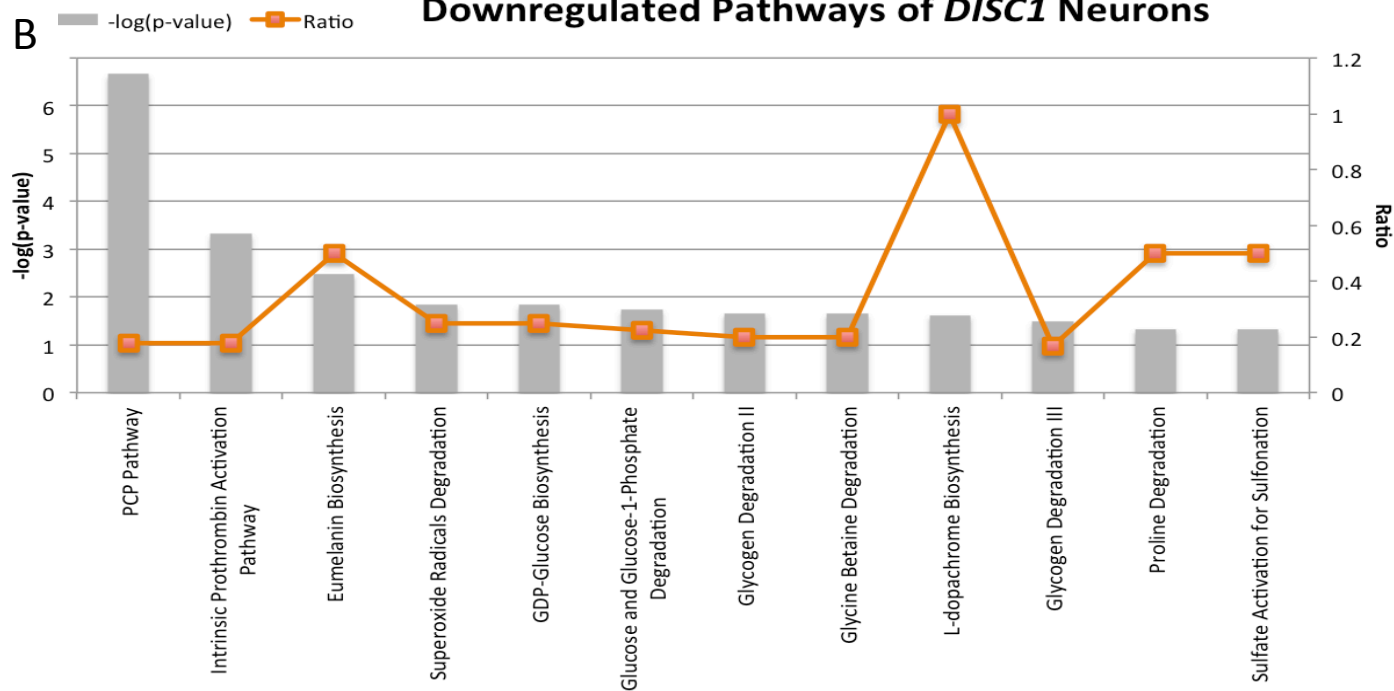

**Appendix Figure S8.** Extended molecular profile data of neurons with mutations in *DISC1*. **A)** Upregulation of amino acid cofactor pathways and **B)** downregulation of superoxide radical and glucose metabolism pathways, induced by transcriptional dysregulation as seen in treemaps in **Figure 6D, E**.

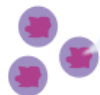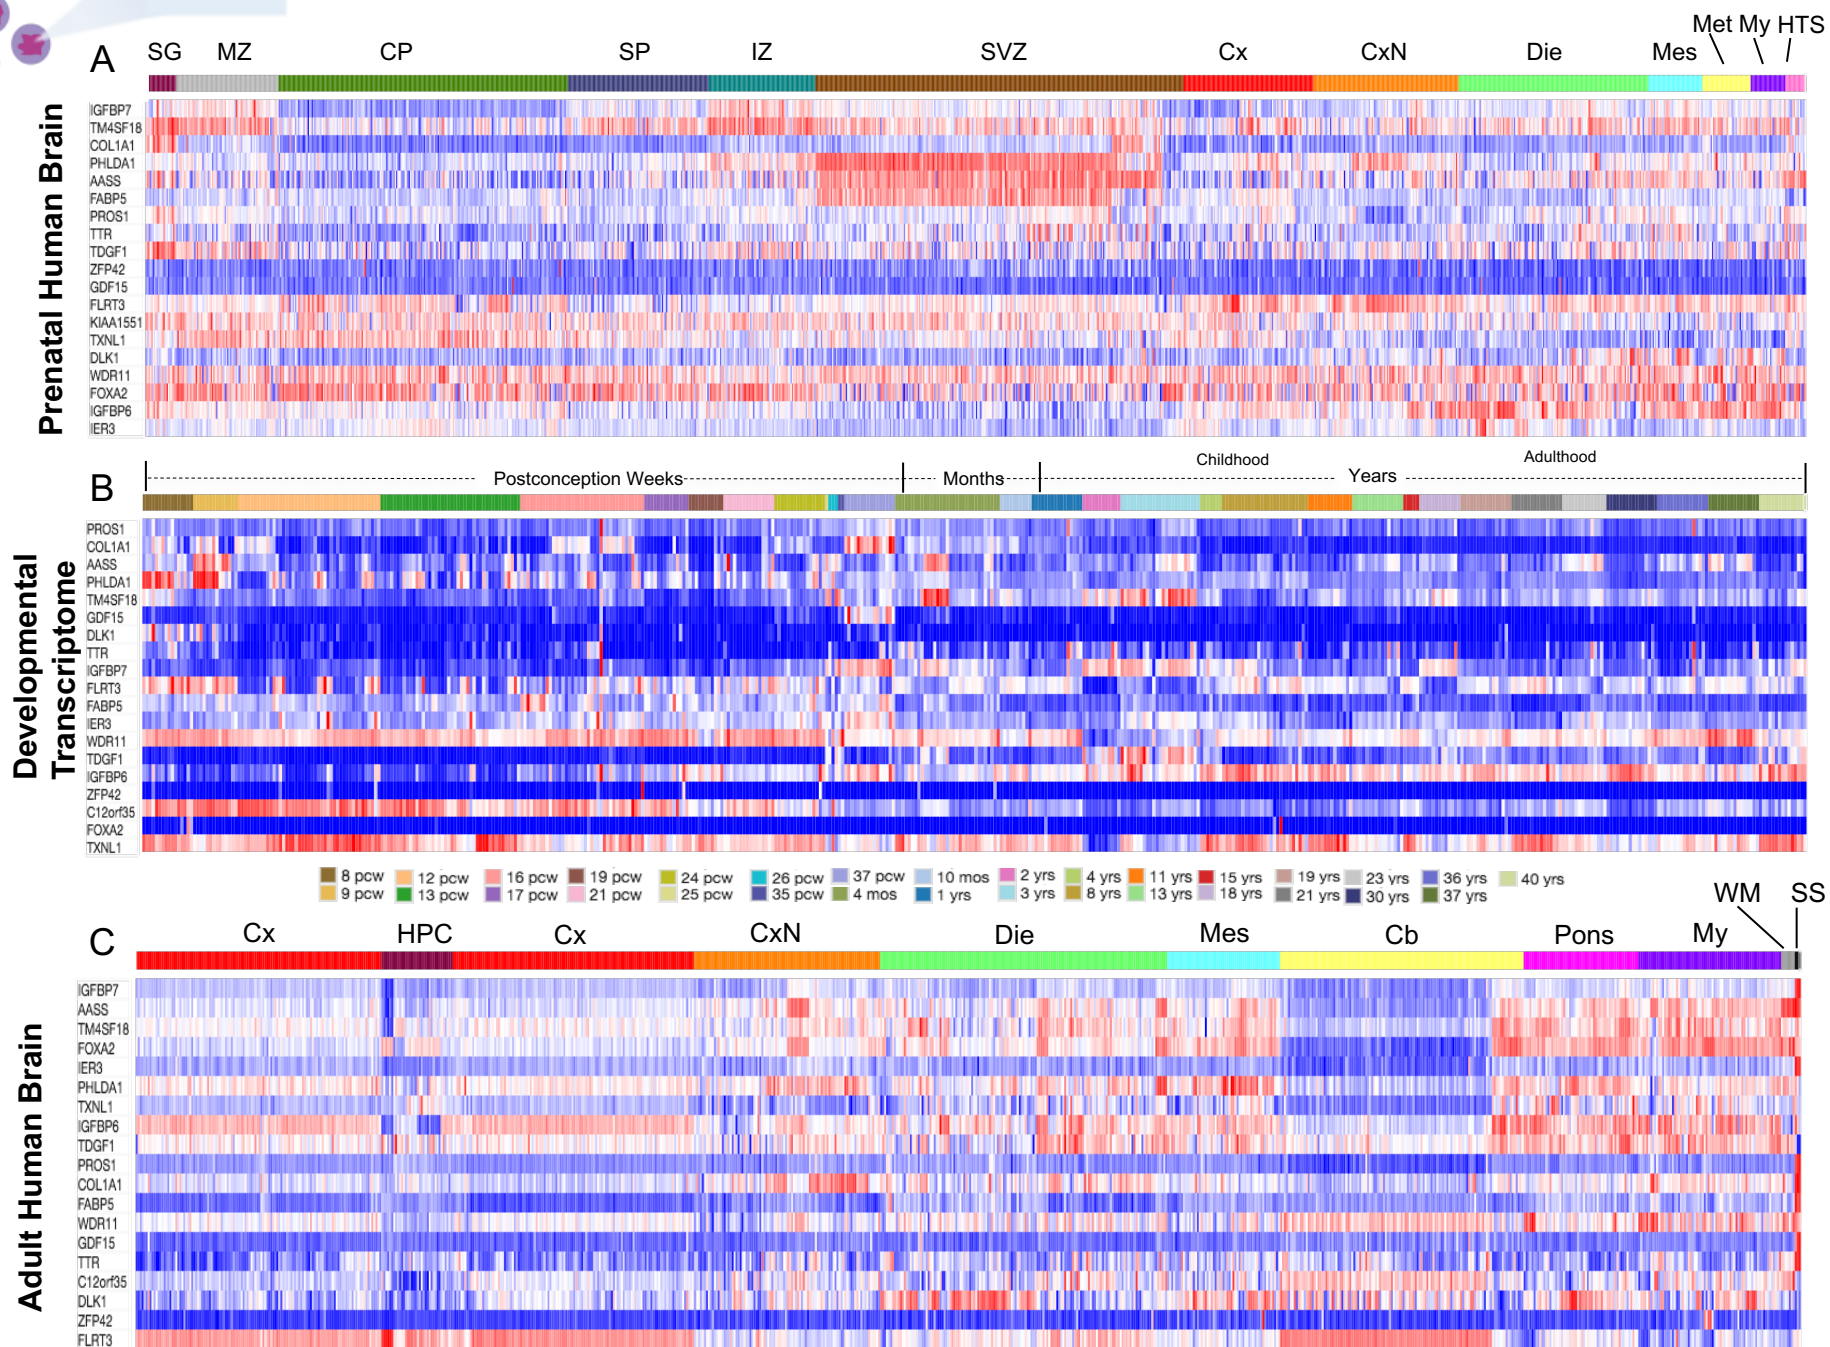

**Appendix Figure S9A-C. Expression patterning of dysregulated genes from iPSCs.** Heatmaps show localization of dysregulated gene expression in the progenitor structures (SVZ) of the prenatal human brain, the late weeks of postconception in the brain during development, and in the pons and myelencephalon (My) adult human brain from iPSCs with **A-C**) *FXN* gene mutations. HTS, Hindbrain transient structures; SG, Subpial granular zone; SP, subplate zone; SS, sulci and spaces.

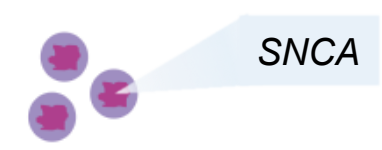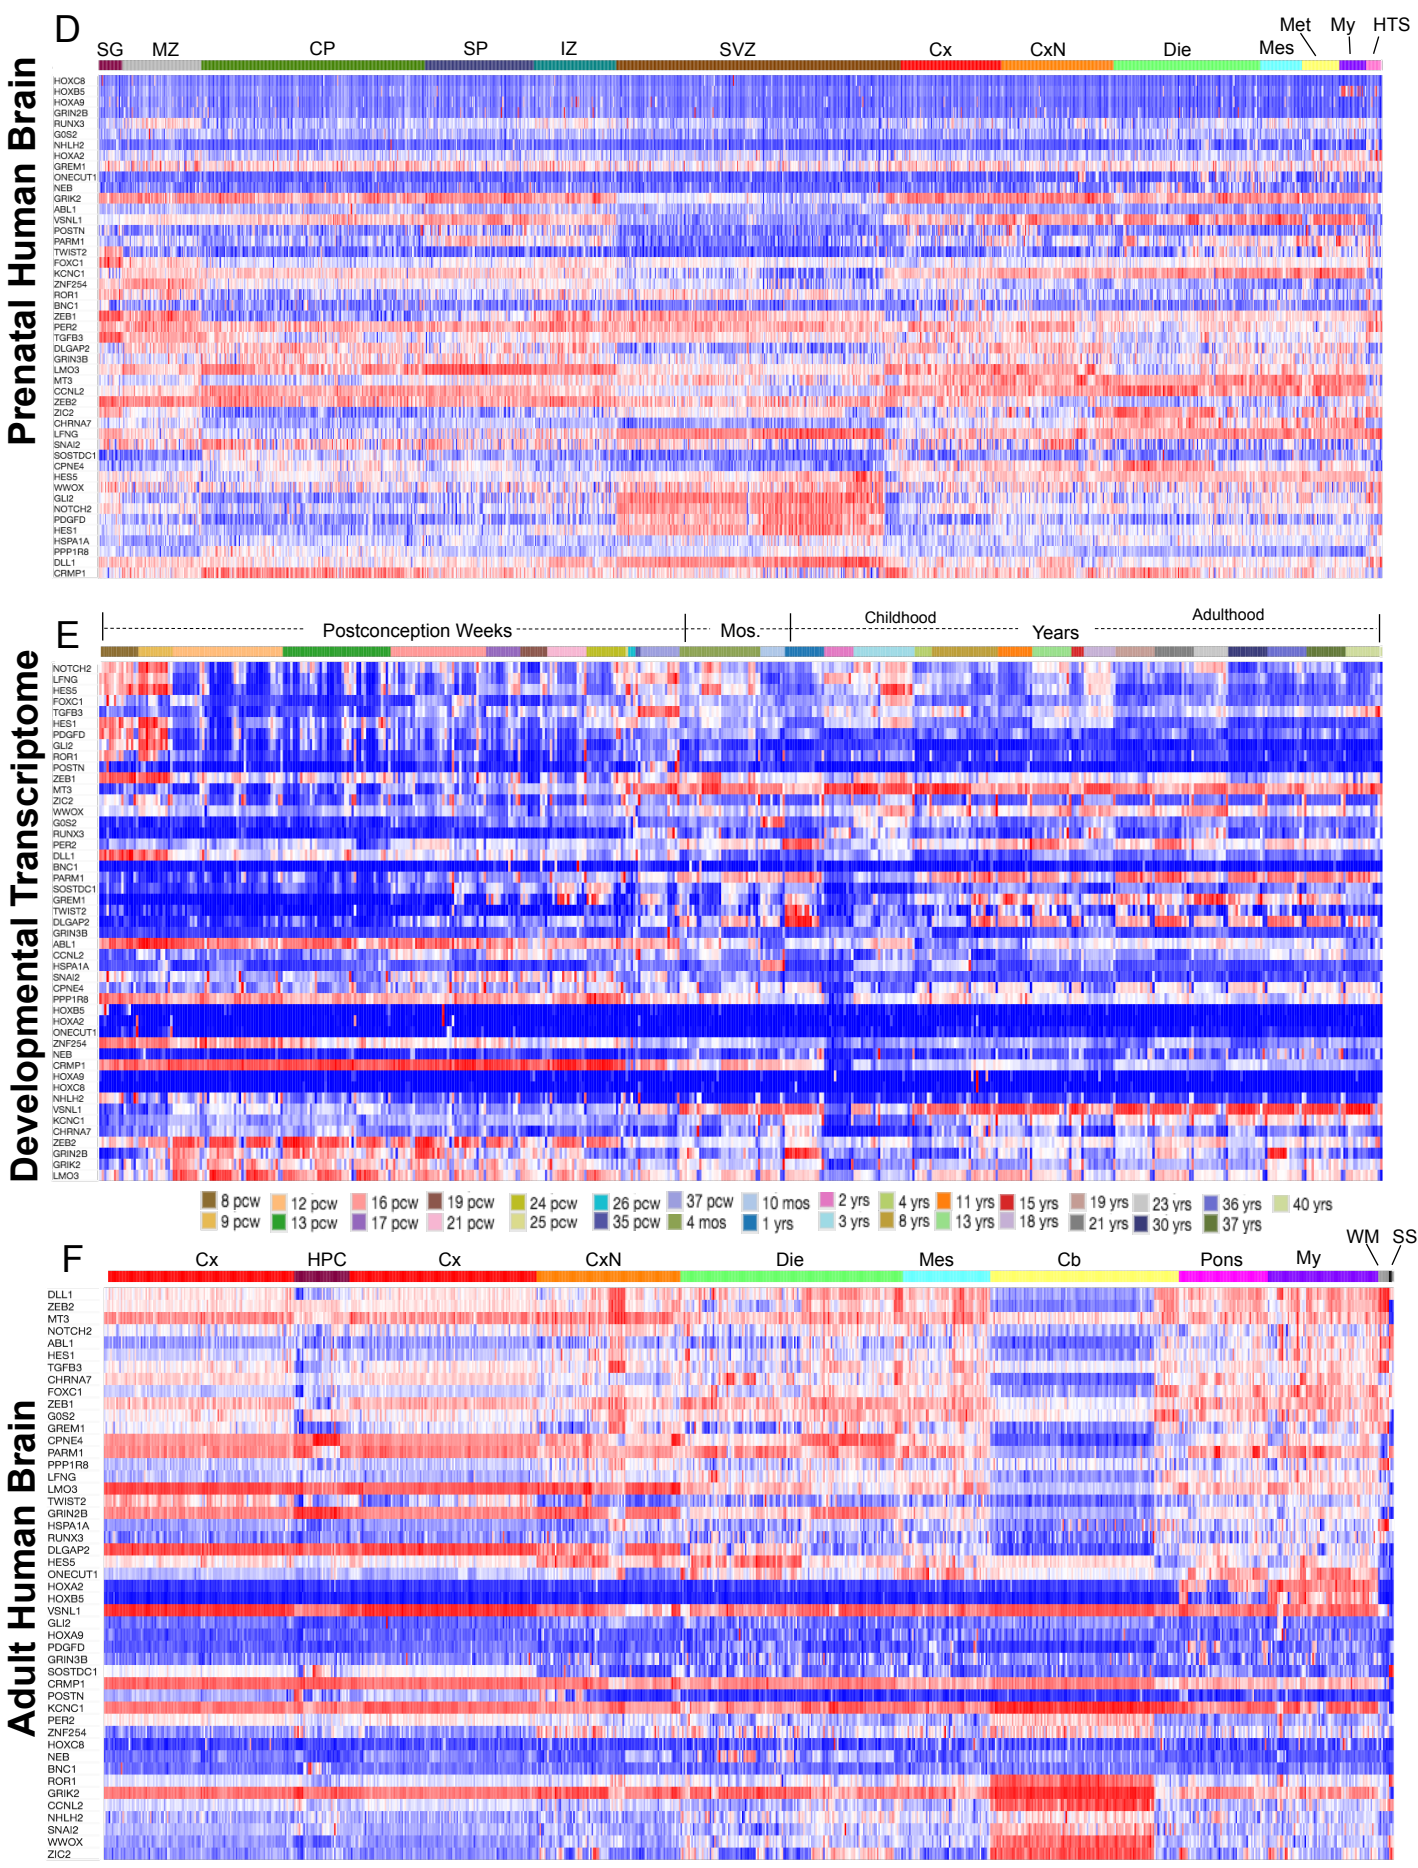

**Appendix Figure S9D-F. Expression patterning of dysregulated genes from iPSCs.** Heatmaps show localization of dysregulated gene expression in the developing cortex (CP, SP) and progenitor zones (SVZ) of the prenatal human brain, expression in the very early weeks of postconception during development, and in the cerebellum and globus pallidus (CxN) in the adult human brain from iPSCs with **D-F** *SNCA* gene mutations. HTS, Hindbrain transient structures; SG, Subpial granular zone; SP, subplate zone; SS, sulci and spaces.

**Appendix Table S1. List of Published Studies Included in Meta-Analysis**

| Disease Classification | First Author | Disease             | Gene/ Mutation                             | Species      | Year | Reprogramming Method                                                                  | Starting Cell Type | Number of Disease Patients Studied | Number of Control Patients | Utilization of Gene-Editing or Isogenetic Cell Lines | Generated Cell Type | GEO ID                   | Platform Name  | Platform GEO             | PMID                           |
|------------------------|--------------|---------------------|--------------------------------------------|--------------|------|---------------------------------------------------------------------------------------|--------------------|------------------------------------|----------------------------|------------------------------------------------------|---------------------|--------------------------|----------------|--------------------------|--------------------------------|
| Neurodegenerative      | Muratore     | Alzheimer's Disease | APP/ V717I                                 | Homo sapiens | 2014 | Lentiviruses encoding Oct4, SOX2, c-MYC and KLF4                                      | Fibroblast         | 2                                  | 4                          | No                                                   | Neurons             | -                        | -              | -                        | <a href="#">PMID: 24524897</a> |
| Neurodegenerative      | Kondo        | Alzheimer's Disease | APP/ E693Δ, APP/ V717I, Sporadic/ AD8K21 3 | Homo sapiens | 2013 | Human complementary DNA by episomal vectors                                           | Fibroblast         | 3, 2, 2                            | 3                          | No                                                   | Neurons, Astrocytes | <a href="#">GSE43326</a> | HuGene-1 0-st  | <a href="#">GPL6244</a>  | <a href="#">PMID: 23434393</a> |
| Neurodegenerative      | Yagi         | Alzheimer's Disease | PSEN1/ A246E, PSEN2/ N141I                 | Homo sapiens | 2011 | Retroviral transduction of OCT4, SOX2, KLF4, LIN28 and NANOG                          | Fibroblast         | 1, 1                               | 1                          | No                                                   | Neurons             | <a href="#">GSE28450</a> | Agilent-022060 | <a href="#">GPL10123</a> | <a href="#">PMID: 21900357</a> |
| Neurodegenerative      | Sproul       | Alzheimer's Disease | PSEN1/ A246E                               | Homo sapiens | 2014 | Oct4, KLF4, Sox2, and c-Myc retroviruses                                              | Fibroblast         | 4                                  | 1                          | No                                                   | NSCs                | -                        | -              | -                        | <a href="#">PMID: 24416243</a> |
| Neurodegenerative      | Koch         | Alzheimer's Disease | PSEN1/ L166P                               | Homo sapiens | 2012 | Lentiviral Backbone (1-α (EF1α) promoter and IRES)                                    | Fibroblast         | 1                                  | 1                          | No                                                   | Neurons             | -                        | -              | -                        | <a href="#">PMID: 22510327</a> |
| Neurodegenerative      | Isreal       | Alzheimer's Disease | APP/ Duplication                           | Homo sapiens | 2012 | MMLV vectors containing the complementary DNAs for OCT4, SOX2, KLF4, c-MYC and ± EGFP | Fibroblast         | 2                                  | 2                          | No                                                   | Neurons             | -                        | -              | -                        | <a href="#">PMID: 22278060</a> |
| Neurodegenerative      | Woodard      | Parkinson's Disease | GBA1/ N370S                                | Homo sapiens | 2014 | Sendai virus of OCT4, SOX2, KLF4 and c-MYC                                            | Fibroblast         | 2                                  | 4                          | Yes                                                  | Neurons             | <a href="#">GSE62642</a> | HiSeq 2500     | <a href="#">GPL16791</a> | <a href="#">PMID: 25456120</a> |
| Neurodegenerative      | Schöndorf    | Parkinson's Disease | GBA1/ L444P, GBA1/ N370S                   | Homo sapiens | 2014 | Retroviruses encoding OCT4, SOX2, KLF4 and c-MYC                                      | Fibroblast         | 4                                  | 2                          | Yes                                                  | Neurons             | -                        | -              | -                        | <a href="#">PMID: 24905578</a> |
| Neurodegenerative      | Liu          | Parkinson's Disease | LRRK2/ G2019S                              | Homo sapiens | 2012 | Retroviruses expressing OCT4, SOX2, KLF4                                              | Fibroblast         | 2                                  | 1                          | Yes                                                  | NSCs                | <a href="#">GSE34061</a> | HiSeq 2000     | <a href="#">GPL11154</a> | <a href="#">PMID: 23075850</a> |
| Neurodegenerative      | Nguyen       | Parkinson's Disease | LRRK2/ G2019S                              | Homo sapiens | 2011 | Retroviruses of OCT4, SOX2,                                                           | Fibroblast         | 1                                  | 1                          | No                                                   | Neurons             | -                        | -              | -                        | <a href="#">PMID: 21362567</a> |

|                   |               |                     |                                         |              |      |                                                                                                           |            |         |   |     |         |                          |                         |                          |                                |
|-------------------|---------------|---------------------|-----------------------------------------|--------------|------|-----------------------------------------------------------------------------------------------------------|------------|---------|---|-----|---------|--------------------------|-------------------------|--------------------------|--------------------------------|
|                   |               |                     |                                         |              |      | and KLF4                                                                                                  |            |         |   |     |         |                          |                         |                          |                                |
| Neurodegenerative | Reinhardt     | Parkinson's Disease | LRRK2/G2019S                            | Homo sapiens | 2013 | Retroviruses containing human Oct3/4, Sox2, Klf4, and c-Myc                                               | Fibroblast | 2       | 4 | Yes | Neurons | <a href="#">GSE43364</a> | illumina HumanH T-12 v4 | <a href="#">GPL10558</a> | <a href="#">PMID: 23472874</a> |
| Neurodegenerative | Sanders       | Parkinson's Disease | LRRK2/G2019S, LRRK2/R1441C              | Homo sapiens | 2013 | Retroviruses of OCT4, SOX2, KLF4 and CMYC                                                                 | Fibroblast | 5, 3    | 3 | Yes | NSCs    | -                        | -                       | -                        | <a href="#">PMID: 24148854</a> |
| Neurodegenerative | Sánchez-Danés | Parkinson's Disease | LRRK2/G2019S                            | Homo sapiens | 2012 | Retroviruses encoding FLAG-tagged OCT4, SOX2 and KLF4                                                     | Fibroblast | 4       | 4 | No  | Neurons | -                        | -                       | -                        | <a href="#">PMID: 22407749</a> |
| Neurodegenerative | Cooper        | Parkinson's Disease | LRRK2/G2019S, LRRK2/R1441C, PINK1/Q456X | Homo sapiens | 2012 | Retroviruses of OCT4, SOX2, KLF4 and c-MYC                                                                | Fibroblast | 3, 2, 2 | 2 | No  | Neurons | -                        | -                       | -                        | <a href="#">PMID: 22764206</a> |
| Neurodegenerative | Reyes         | Parkinson's Disease | SNCA/Triplication                       | Homo sapiens | 2014 | Retroviruses of Oct4, Sox2, c-Myc, Klf4                                                                   | Fibroblast | 3       | 1 | No  | Neurons | -                        | -                       | -                        | <a href="#">PMID: 25046995</a> |
| Neurodegenerative | Byers         | Parkinson's Disease | SNCA/Triplication                       | Homo sapiens | 2011 | Retroviral gene insertion of OCT4, SOX2, KLF4, and c-MYC                                                  | Fibroblast | 1       | 1 | No  | Neurons | -                        | -                       | -                        | <a href="#">PMID: 22110584</a> |
| Neurodegenerative | Devine        | Parkinson's Disease | SNCA/Triplication                       | Homo sapiens | 2011 | pMXs-cMyc #13375, pMXs-Klf4 #13370, pMXs-Oct4 #13366, pMXs-Sox2 #13367 reprogramming factors from Addgene | Fibroblast | 1       | 1 | No  | Neurons | <a href="#">GSE28366</a> | HumanO mni1-Quad        | <a href="#">GPL8882</a>  | <a href="#">PMID: 21863007</a> |
| Neurodegenerative | Chung         | Parkinson's Disease | SNCA/Triplication                       | Homo sapiens | 2013 | Cre-excisable polycistronic lentivirus encoding SOX2, KLF4, OCT4 and c-MYC                                | Fibroblast | 1       | 1 | Yes | Neurons | -                        | -                       | -                        | <a href="#">PMID: 24158904</a> |
| Neurodegenerative | Ryan          | Parkinson's Disease | SNCA/A53T                               | Homo sapiens | 2013 | Retroviruses of OCT4, KLF4, SOX2, and c-MYC                                                               | Fibroblast | 2       | 1 | Yes | Neurons | <a href="#">GSE46798</a> | illumina HumanH T-12 v4 | <a href="#">GPL10558</a> | <a href="#">PMID: 24290359</a> |
| Neurodegenerative | Jiang         | Parkinson's Disease | Parkin/Deletions on exons 3 and 5       | Homo sapiens | 2012 | FUW-tetO-LoxP lentiviruses: hOct4, hSox4, hKlf4 and hNanog                                                | Fibroblast | 2       | 2 | No  | Neurons | <a href="#">GSE35190</a> | RPC1 Human HB21K        | <a href="#">GPL15098</a> | <a href="#">PMID: 22314364</a> |



|                    |          |                             |                                    |              |      |                                                                                                 |            |   |   |     |                                  |                          |                |                        |                                |
|--------------------|----------|-----------------------------|------------------------------------|--------------|------|-------------------------------------------------------------------------------------------------|------------|---|---|-----|----------------------------------|--------------------------|----------------|------------------------|--------------------------------|
| Neurodegenerative  | Imaizumi | Parkinson's Disease         | Parkin/ Deletions on exons 3 and 5 | Homo sapiens | 2012 | Retroviruses carrying Oct4, Sox2, Klf4, and c-Myc                                               | Fibroblast | 2 | 2 | No  | Neurons                          | -                        | -              | -                      | <a href="#">PMID: 23039195</a> |
| Neurodegenerative  | Rakovic  | Parkinson's Disease         | PINK1/ Q456X                       | Homo sapiens | 2012 | Retroviral pMIG vectors OCT4, SOX2, cMYC and KLF4                                               | Fibroblast | 2 | 1 | No  | Neurons                          | -                        | -              | -                      | <a href="#">PMID: 23212910</a> |
| Neurodegenerative  | Seibler  | Parkinson's Disease         | PINK1/ Q456X, PINK1/ V170G         | Homo sapiens | 2011 | Retroviral pMIG vectors OCT4, SOX2, cMYC and KLF4                                               | Fibroblast | 3 | 1 | No  | Neurons                          | -                        | -              | -                      | <a href="#">PMID: 21508222</a> |
| Neurodevelopmental | Xia      | Dystrophia Myotonica type 1 | DMPK/ CTG repeats                  | Homo sapiens | 2013 | Retroviral transduction of hOct4, hSox2, hKlf4, and hc-Myc                                      | Fibroblast | 2 | 1 | No  | Neurons, NSCs, Astrocytes, iPSCs | -                        | -              | -                      | <a href="#">PMID: 23550732</a> |
| Neurodegenerative  | Corti    | Spinal Muscular Atrophy     | SMN1/ not specified                | Homo sapiens | 2012 | oriP/EBNA1-based episomal vectors of OCT4, SOX2, NANOG, LIN28, c-Myc, and KLF4 by nucleofection | Fibroblast | 2 | 2 | No  | Neurons                          | <a href="#">GSE27206</a> | HG-U133_Plus 2 | <a href="#">GPL570</a> | <a href="#">PMID: 23253609</a> |
| Neurodegenerative  | Chang    | Spinal Muscular Atrophy     | SMN1/ not specified                | Homo sapiens | 2011 | Retroviral vectors containing Oct4, Sox2, c-Myc, Klf4                                           | Fibroblast | 1 | 1 | Yes | Neurons                          | -                        | -              | -                      | <a href="#">PMID: 21956898</a> |
| Neurodegenerative  | Ebert    | Spinal Muscular Atrophy     | SMN1/ not specified                | Homo sapiens | 2009 | Lentiviral infection of primers for OCT 4, SOX 2, NANOG, LIN 28, HoxB4, SMN, and GAPDH          | Fibroblast | 1 | 1 | No  | Neurons, Astrocytes              | <a href="#">GSE13828</a> | HG-U133_Plus 2 | <a href="#">GPL570</a> | <a href="#">PMID: 19098894</a> |
| Neurodegenerative  | Sareen   | Spinal Muscular Atrophy     | SMN1/ not specified                | Homo sapiens | 2012 | Lentiviral infection of primers for OCT 4, SOX 2, NANOG, LIN 28, HoxB4, SMN, and GAPDH          | Fibroblast | 2 | 1 | No  | Neurons                          | -                        | -              | -                      | <a href="#">PMID: 22723941</a> |

|                    |           |                                                        |                                                             |              |      |                                                                                                                         |            |       |       |     |                                             |                          |                         |                          |                                |
|--------------------|-----------|--------------------------------------------------------|-------------------------------------------------------------|--------------|------|-------------------------------------------------------------------------------------------------------------------------|------------|-------|-------|-----|---------------------------------------------|--------------------------|-------------------------|--------------------------|--------------------------------|
| Viral Infection    | Lafaille  | Childhood HSE                                          | UNC-93-B/ not specified, TLR3/ not specified                | Homo sapiens | 2012 | Polycistronic lentiviral pHAGE-STEMCCA-LoxP vector, carrying the OCT4, SOX2, KLF4, and C-MYC reprogramming factor genes | Fibroblast | 1, 1  | 1     | No  | Neurons, NSCs, Astrocytes, Oligodendrocytes | <a href="#">GSE40593</a> | Illumina HumanWG-6 v3.0 | <a href="#">GPL6884</a>  | <a href="#">PMID: 23103873</a> |
| Neurodevelopmental | Marchetto | Rett Syndrome                                          | MeCP2/Q244X                                                 | Homo sapiens | 2010 | Retrovirus vectors containing the Oct4, c-Myc, Klf4 and Sox2                                                            | Fibroblast | 4     | 5     | No  | Neurons                                     | <a href="#">GSE21037</a> | HuGene-1.0-st           | <a href="#">GPL6244</a>  | <a href="#">PMID: 21074045</a> |
| Neurodevelopmental | Kim       | Rett Syndrome                                          | MeCP2/Q244X                                                 | Homo sapiens | 2011 | pMIG retrovirus expressing OCT4, SOX2, KLF4, and MYC                                                                    | Fibroblast | 5     | 5     | No  | Neurons, NSCs, iPSCs                        | -                        | -                       | -                        | <a href="#">PMID: 21807996</a> |
| Neurodevelopmental | Ricciardi | Rett Syndrome                                          | CDKL5/R59X, CDKL5/L220P                                     | Homo sapiens | 2012 | Retrovirus infection of OCT4, SOX2 and KLF4                                                                             | Fibroblast | 2, 2  | 2     | No  | Neurons                                     | -                        | -                       | -                        | <a href="#">PMID: 22922712</a> |
| Neurodevelopmental | Cheung    | Rett Syndrome                                          | MeCP2/deletions on exons 3 and 4, MeCP2/T158M, MeCP2/R306C, | Homo sapiens | 2011 | Lentiviral infection with EOS-vector and MoMLV-based retroviral vectors encoding OCT4, SOX2, KLF4 and c-MYC             | Fibroblast | 1,3,3 | 1,1,1 | Yes | iPSCs                                       | -                        | -                       | -                        | <a href="#">PMID: 21372149</a> |
| Neurodegenerative  | Koch      | Spinocerebellar Ataxia Type 3                          | ATXN3/CAG repeats                                           | Homo sapiens | 2011 | Retroviral plasmids for OCT4, SOX2, KLF4 and c-MYC                                                                      | Fibroblast | 1     | 2     | No  | Neurons                                     | -                        | -                       | -                        | <a href="#">PMID: 22113611</a> |
| Neurodegenerative  | Almeida   | Frontotemporal dementia                                | PGRN/S116X                                                  | Homo sapiens | 2012 | Retroviruses encoding human OCT3/4, SOX2, KLF4, and c-MYC                                                               | Fibroblast | 1     | 1     | No  | Neurons                                     | <a href="#">GSE40378</a> | Illumina HumanHT-12 v4  | <a href="#">GPL10558</a> | <a href="#">PMID: 23063362</a> |
| Neurodegenerative  | Almeida   | Frontotemporal dementia/ Amyotrophic lateral sclerosis | C9ORF72/ GGGGC C repeats                                    | Homo sapiens | 2013 | Retroviruses expressing human OCT3/4, SOX2, KLF4, and c-MYC                                                             | Fibroblast | 2     | 1     | No  | Neurons                                     | -                        | -                       | -                        | <a href="#">PMID: 23836290</a> |
| Neurodegenerative  | Sareen    | Frontotemporal dementia/                               | C9ORF72/ GGGGC                                              | Homo sapiens | 2013 | pCXLE-hUL, pCXLE-hSK, and pCXLE-                                                                                        | Fibroblast | 4     | 4     | No  | Neurons, NSCs, Astrocytes                   | <a href="#">GSE52202</a> | HiSeq 2000              | <a href="#">GPL11154</a> | <a href="#">PMID: 24154603</a> |

|                    |          |                               |                                          |              |      |                                                                                                                                       |            |         |   |     |            |                          |                                |                          |  |                                |
|--------------------|----------|-------------------------------|------------------------------------------|--------------|------|---------------------------------------------------------------------------------------------------------------------------------------|------------|---------|---|-----|------------|--------------------------|--------------------------------|--------------------------|--|--------------------------------|
|                    |          | Amyotrophic lateral sclerosis | C repeats                                |              |      | hOCT3/4-shp53-F vectors                                                                                                               |            |         |   |     |            |                          |                                |                          |  |                                |
| Neurodegenerative  | Bilican  | Amyotrophic lateral sclerosis | TDP-43/M337V                             | Homo sapiens | 2012 | Retroviral pMIG vectors OCT4, SOX2, cMYC and KLF4                                                                                     | Fibroblast | 1       | 2 | No  | Neurons    | -                        | -                              | -                        |  | <a href="#">PMID: 22451909</a> |
| Neurodegenerative  | Egawa    | Amyotrophic lateral sclerosis | TDP-43/M337V, TDP-43/Q343R, TDP-43/G298S | Homo sapiens | 2012 | Retrovirus of Sox2, Klf4, Oct3/4, and/or c-Myc or episomal vectors of Sox2, Klf4, Oct3/4, L-Myc, Lin28, and short hairpin RNA for p53 | Fibroblast | 3, 3, 3 | 5 | No  | Neurons    | -                        | -                              | -                        |  | <a href="#">PMID: 22855461</a> |
| Neurodegenerative  | Serio    | Amyotrophic lateral sclerosis | TDP-43/M337V                             | Homo sapiens | 2013 | Retroviruses encoding Oct4, Sox2, Klf4 and Myc                                                                                        | Fibroblast | 1       | 2 | No  | Astrocytes | -                        | -                              | -                        |  | <a href="#">PMID: 23401527</a> |
| Neurodegenerative  | Chen     | Amyotrophic lateral sclerosis | SOD1/D90A, SOD1/A4V                      | Homo sapiens | 2014 | Nonintegrating Sendai virus of OCT4, SOX2, KLF4 and c-MYC, Retroviral plasmids for OCT4, SOX2, KLF4 and c-MYC                         | Fibroblast | 1, 1    | 2 | Yes | Neurons    | -                        | -                              | -                        |  | <a href="#">PMID: 24704493</a> |
| Neurodegenerative  | Kiskinis | Amyotrophic lateral sclerosis | SOD1/A4V                                 | Homo sapiens | 2014 | Retroviral transduction of SOX2, OCT3/4, KLF4 and C-MYC                                                                               | Fibroblast | 2       | 2 | Yes | Neurons    | <a href="#">GSE54409</a> | HiSeq 2000                     | <a href="#">GPL11154</a> |  | <a href="#">PMID: 24704492</a> |
| Neurodevelopmental | Pasca    | Timothy Syndrome              | CACNA1C/Ca <sub>v</sub> 1.2              | Homo sapiens | 2012 | Retroviruses expressing SOX2, OCT3/4, KLF4 and C-MYC                                                                                  | Fibroblast | 2       | 3 | No  | Neurons    | <a href="#">GSE25542</a> | Illumina HumanRef-8 v3.0       | <a href="#">GPL6883</a>  |  | <a href="#">PMID: 22120178</a> |
| Neurodegenerative  | Zhang    | Huntington's Disease          | HTT/CAG repeats                          | Homo sapiens | 2010 | VSVg retroviruses of Sox2, Klf4, Oct3/4, and/or c-Myc                                                                                 | Fibroblast | 1       | 1 | No  | NSCs       | -                        | -                              | -                        |  | <a href="#">PMID: 21037797</a> |
| Neurodegenerative  | An       | Huntington's Disease          | HTT/CAG repeats                          | Homo sapiens | 2012 | VSVg retroviruses of Sox2, Klf4, Oct3/4, and/or c-Myc                                                                                 | Fibroblast | 1       | 1 | Yes | NSCs       | <a href="#">GSE37547</a> | Nimblegen Human HG18 (12x135k) | <a href="#">GPL15338</a> |  | <a href="#">PMID: 22748967</a> |
| Neurodegenerative  | Jeon     | Huntington's Disease          | HTT/CAG                                  | Homo sapiens | 2012 | VSVg retroviruses of                                                                                                                  | Fibroblast | 1       | 3 | No  | iPSCs      | -                        | -                              | -                        |  | <a href="#">PMID: 22628015</a> |

|                    |                    |                                      |                                                        |              |      |                                                                                                                       |            |      |   |    |                           |                          |                |                          |  |                                |
|--------------------|--------------------|--------------------------------------|--------------------------------------------------------|--------------|------|-----------------------------------------------------------------------------------------------------------------------|------------|------|---|----|---------------------------|--------------------------|----------------|--------------------------|--|--------------------------------|
|                    |                    |                                      | repeats                                                |              |      | Sox2, Klf4, Oct3/4, and/or c-Myc                                                                                      |            |      |   |    |                           |                          |                |                          |  |                                |
| Neurodegenerative  | Juopperi           | Huntington's Disease                 | HTT/CAG repeats                                        | Homo sapiens | 2012 | Retroviral transduction of Oct3/4, Sox2, c-MYC and Klf4                                                               | Fibroblast | 2    | 1 | No | Astrocytes                | -                        | -              | -                        |  | <a href="#">PMID: 22613578</a> |
| Neurodegenerative  | Chae               | Huntington's Disease                 | HTT/CAG repeats                                        | Homo sapiens | 2012 | VSVg retroviruses of Sox2, Klf4, Oct3/4, and/or c-Myc                                                                 | Fibroblast | 2    | 2 | No | iPSCs                     | -                        | -              | -                        |  | <a href="#">PMID: 24231356</a> |
| Neurodegenerative  | Guo                | Huntington's Disease                 | HTT/CAG repeats                                        | Homo sapiens | 2013 | VSV-g pseudotyped hSTEMCCA lentivirus containing a polycistronic coding sequence for Sox2, Klf4, Oct3/4, and/or c-Myc | Fibroblast | 2    | 2 | No | Neurons                   | -                        | -              | -                        |  | <a href="#">PMID: 24231356</a> |
| Neurodegenerative  | HD iPSC Consortium | Huntington's Disease                 | HTT/CAG repeats                                        | Homo sapiens | 2012 | Lentiviral transduction of Oct4, Sox2, Klf4, cMyc, Nanog and Lin2 8                                                   | Fibroblast | 2    | 2 | No | Neurons, NSCs             | <a href="#">GSE37517</a> | HuGene-1_0-st  | <a href="#">GPL10739</a> |  | <a href="#">PMID: 22748968</a> |
| Neurodevelopmental | Jang               | X-linked adrenoleukodystrophy        | ABCD1 or ALDP/AMN patient, ABCD1 or ALDP/CCALD patient | Homo sapiens | 2011 | Retroviral plasmids for OCT4, SOX2, KLF4 and c-MYC                                                                    | Fibroblast | 1, 1 | 1 | No | Neurons, Oligodendrocytes | -                        | -              | -                        |  | <a href="#">PMID: 21721033</a> |
| Neurodevelopmental | Liu                | Dravet Syndrome                      | SCN1A/IVS14+3 A>T                                      | Homo sapiens | 2013 | Retroviral infection of pMXs-Oct3/4, pMXs-Sox2, pMXs-Klf4, pMXs-c-Myc                                                 | Fibroblast | 2    | 3 | No | Neurons                   | -                        | -              | -                        |  | <a href="#">PMID: 23821540</a> |
| Neurodevelopmental | Higurashi          | Dravet Syndrome                      | SCN1A/ mutation on 4933C>T                             | Homo sapiens | 2013 | Retroviral plasmids for OCT4, SOX2, KLF4 and c-MYC                                                                    | Fibroblast | 1    | 1 | No | Neurons                   | -                        | -              | -                        |  | <a href="#">PMID: 23639079</a> |
| Neurodevelopmental | Liu                | Hutchinson-Gilford progeria syndrome | LMNA/ point mutation                                   | Homo sapiens | 2011 | Retroviruses encoding OCT4, SOX2, KLF4, c-MYC, and GFP                                                                | Fibroblast | 1    | 2 | No | iPSCs                     | <a href="#">GSE24487</a> | HG-U133_Plus 2 | <a href="#">GPL570</a>   |  | <a href="#">PMID: 21346760</a> |

|                    |                  |                              |                            |              |      |                                                                                                |            |   |   |     |                  |          |                           |         |                |
|--------------------|------------------|------------------------------|----------------------------|--------------|------|------------------------------------------------------------------------------------------------|------------|---|---|-----|------------------|----------|---------------------------|---------|----------------|
| Neurodegenerative  | Hick             | Friedreich's Ataxia          | FXN/ expanded GAA repeats  | Homo sapiens | 2012 | Lentivirus factors OCT4, SOX2, LIN28 and ANOAG                                                 | Fibroblast | 2 | 2 | No  | Neurons, iPSCs   | -        | -                         | -       | PMID: 23136396 |
| Neurodegenerative  | Sherman          | Friedreich's Ataxia          | FXN/ Long GAA-TT C repeats | Homo sapiens | 2010 | VSV-G Retrovirus vectors for Oct3/4, Sox2, Klf4, and c-Myc                                     | Fibroblast | 2 | 1 | No  | iPSCs            | GSE22651 | Illumina HumanH T-12 V3.0 | GPL6947 | PMID: 21040903 |
| Neurodevelopmental | Andrade          | Cockayne syndrome            | ERCC6/ not specified       | Homo sapiens | 2012 | pMXs retroviral vectors containing the human cDNA for c-Myc, Klf4, Oct3/4, Sox2 VSVG and CMVgp | Fibroblast | 1 | 2 | No  | Neurons, iPSCs   | GSE36648 | HuGene-1_0-st             | GPL6244 | PMID: 22661500 |
| Neurodegenerative  | Fong             | Tauopathies                  | MAPT/ A152T                | Homo sapiens | 2013 | Retroviral plasmids for OCT4, SOX2, KLF4 and c-MYC                                             | Fibroblast | 1 | 1 | Yes | Neurons          | -        | -                         | -       | PMID: 24319659 |
| Neurodevelopmental | Numasawa-Kuroiwa | Pelizaeus-Merzbacher disease | PLP1/ missense             | Homo sapiens | 2014 | Retroviral plasmids for OCT4, SOX2, KLF4 and c-MYC                                             | Fibroblast | 2 | 2 | No  | Oligodendrocytes | -        | -                         | -       | PMID: 24936452 |
| Neurodevelopmental | Doers            | Fragile X Syndrome           | FMR1/ CGG repeats          | Homo sapiens | 2014 | Retroviral transduction of Oct3/4, Sox2, c-MYC and Klf4                                        | Fibroblast | 3 | 1 | Yes | Neurons          | -        | -                         | -       | PMID: 24654675 |
| Neurodevelopmental | Sheridan         | Fragile X Syndrome           | FMR1/ CGG repeats          | Homo sapiens | 2011 | Retroviral pMIG vectors OCT4, SOX2, cMYC and KLF4                                              | Fibroblast | 3 | 2 | No  | Neurons          | -        | -                         | -       | PMID: 22022567 |
| Neurodevelopmental | Suh              | Menkes Disease               | ATP7A/ c4005 + G > A       | Homo sapiens | 2014 | Retroviral transduction of Oct3/4, Sox2, c-MYC and Klf4                                        | Fibroblast | 1 | 1 | No  | iPSCs            | -        | -                         | -       | PMID: 24468087 |
| Neurodevelopmental | Higuchi          | Pompe Disease                | GAA/ not specified         | Homo sapiens | 2014 | pMX retrovirus vectors OCT3/4, SOX2, KLF4, and c-MYC.                                          | Fibroblast | 2 | 1 | No  | iPSCs            | -        | -                         | -       | PMID: 24642446 |
| Neurodevelopmental | Maetzel          | Niemann-Pick Type C          | NPC1/ I1061T               | Homo sapiens | 2014 | Lentiviruses encoding a polycistronic doxycycline-inducible (DOX) for Oct4, Klf4, Sox2, c-Myc  | Fibroblast | 4 | 2 | Yes | Neurons          | -        | -                         | -       | PMID: 24936472 |
| Neurodevelopmental | Mazzulli         | Gaucher's Disease            | GBA1/ not                  | Homo sapiens | 2011 | Retroviral pMIG vectors OCT4,                                                                  | Fibroblast | 2 | 3 | No  | iPSCs, Neurons   | -        | -                         | -       | PMID: 21700325 |

|                    |           |                                          |                                                        |              |      |                                                                          |            |            |   |     |                      |                          |                          |                          |                                |
|--------------------|-----------|------------------------------------------|--------------------------------------------------------|--------------|------|--------------------------------------------------------------------------|------------|------------|---|-----|----------------------|--------------------------|--------------------------|--------------------------|--------------------------------|
|                    |           |                                          | specified                                              |              |      | SOX2, cMYC and KLF4                                                      |            |            |   |     |                      |                          |                          |                          |                                |
| Neurodevelopmental | Ananiev   | Rett Syndrome                            | MeCP2/R294X, MeCP2/T158M, MeCP2/V247X, MeCP2/R306C     | Homo sapiens | 2011 | Retroviral plasmids for OCT4, SOX2, KLF4 and c-MYC                       | Fibroblast | 1, 1, 1, 1 | 1 | Yes | Neurons, iPSCs       | -                        | -                        | -                        | <a href="#">PMID: 21966470</a> |
| Neurodevelopmental | Panicker  | Gaucher's Disease                        | GBA1/L444P, GBA1/N370S                                 | Homo sapiens | 2012 | Retroviral plasmids for OCT4, SOX2, KLF4 and c-MYC                       | Fibroblast | 2, 1       | 2 | No  | Neurons              | -                        | -                        | -                        | <a href="#">PMID: 23071332</a> |
| Neurodevelopmental | Krey      | Timothy Syndrome                         | CACNA1C/Ca <sub>v</sub> 1.2                            | Homo sapiens | 2013 | Retroviral transduction of Oct3/4, Sox2, c-MYC and Klf4                  | Fibroblast | 2          | 2 | No  | Neurons              | -                        | -                        | -                        | <a href="#">PMID: 23313911</a> |
| Psychiatric        | Yoon      | Schizophrenia                            | CYFIP1/15q11.2                                         | Homo sapiens | 2014 | Sendai Viral Infection                                                   | Fibroblast | 3          | 3 | No  | NSCs                 | -                        | -                        | -                        | <a href="#">PMID: 24996170</a> |
| Psychiatric        | Wen       | Schizophrenia/ Major Depressive Disorder | DISC1/4bp C-terminus deletion                          | Homo sapiens | 2014 | Non-integrating EBV-based vector transfection                            | Fibroblast | 2          | 3 | Yes | Neurons              | <a href="#">GSE57821</a> | Ion Torrent Proton       | <a href="#">GPL17303</a> | <a href="#">PMID: 25132547</a> |
| Neurodegenerative  | Liu       | Alzheimer's Disease                      | APP/Duplication, PSEN1/A246E, PSEN1/H163R, PSEN1/M146L | Homo sapiens | 2014 | Maloney Murine Leukemia Virus infection of Oct3/4, Sox2, Klf4, and c-Myc | Fibroblast | 1, 2, 1, 1 | 2 | No  | Neurons, NSCs, iPSCs | -                        | -                        | -                        | <a href="#">PMID: 25285942</a> |
| Neurodegenerative  | Ren       | Parkinson's Disease                      | Parkin/Deletions on exons 3 and 5                      | Homo sapiens | 2015 | Lentiviruses expressing human Oct4, Sox2, Klf4, c-Myc and Nanog          | Fibroblast | 2          | 2 | No  | Neurons              | -                        | -                        | -                        | <a href="#">PMID: 25332110</a> |
| Neurodegenerative  | Devlin    | Amyotrophic lateral sclerosis            | TDP-43/M337V, C9ORF72/GGGGC repeats                    | Homo sapiens | 2015 | Lentivirus or Sendai vectors for OCT4, SOX2, KLF4 and c-MYC              | Fibroblast | 1, 2       | 3 | No  | Neurons              | -                        | -                        | -                        | <a href="#">PMID: 25580746</a> |
| Neurodevelopmental | Efthymiou | Niemann-Pick Type C                      | NPC1 / I1061T                                          | Homo sapiens | 2015 | STEMCCA lentivirus system                                                | Fibroblast | 1          | 1 | No  | Neurons              | <a href="#">GSE55379</a> | Illumina HumanHT-12 V4.0 | <a href="#">GPL10558</a> | <a href="#">PMID: 25637190</a> |
| Neurodegenerative  | Liu       | Amyotrophic                              | FUS/P52                                                | Homo         | 2015 | Nucleofected                                                             | Fibroblast | 1          | 1 | No  | Neurons              | -                        | -                        | -                        | <a href="#">PMID: 25912081</a> |

|                    |                    |                               |                                                                   |              |      |                                                                                                                         |            |          |       |     |                |                          |                      |                          |  |  |                                |
|--------------------|--------------------|-------------------------------|-------------------------------------------------------------------|--------------|------|-------------------------------------------------------------------------------------------------------------------------|------------|----------|-------|-----|----------------|--------------------------|----------------------|--------------------------|--|--|--------------------------------|
|                    |                    | c lateral sclerosis           | 5L                                                                | sapiens      |      | with 15–20 µg EVplasmid DNA using a human CD34+ Cell Nucleofector™ Kit                                                  |            |          |       |     |                |                          |                      |                          |  |  |                                |
| Neurodegenerative  | Lenzi              | Amyotrophic lateral sclerosis | FUS/R514S, FUS/R521C, FUS/P525L                                   | Homo sapiens | 2015 | Lentiviral vector hSTEMCCA for OCT4, SOX2, KLF4 and c-MYC                                                               | Fibroblast | 1, 1, 1, | 2     | Yes | Neurons, iPSCs | -                        | -                    | -                        |  |  | <a href="#">PMID: 26035390</a> |
| Neurodegenerative  | Ehrlich            | Frontotemporal dementia       | MAPT/N279K, MAPT/V337M                                            | Homo sapiens | 2015 | Lentiviral transduction with a polycistronic vector encoding <i>OCT4</i> , <i>KLF4</i> , <i>SOX2</i> , and <i>C-MYC</i> | Fibroblast | 1, 1     | 3     | No  | Neurons        | -                        | -                    | -                        |  |  | <a href="#">PMID: 26143746</a> |
| Neurodegenerative  | Liu                | Spinal Muscular Atrophy       | SMN1/ Deletion of exons 7 and 8                                   | Homo sapiens | 2015 | Retrovirus for OCT4, SOX2, KLF-4 and c-MYC                                                                              | Fibroblast | 3        | 3     | No  | Neurons        | -                        | -                    | -                        |  |  | <a href="#">PMID: 26190808</a> |
| Neurodevelopmental | Shcheglovitov      | Phelan-McDermid Syndrome      | SHANK3 / Deletion                                                 | Homo sapiens | 2013 | Retroviruses carrying SOX2, OCT3/4, c-MYC and KLF4 transcription factors                                                | Fibroblast | 2        | 2     | No  | iPSCs, Neurons | -                        | -                    | -                        |  |  | <a href="#">PMID: 24132240</a> |
| Neurodegenerative  | HD iPSC Consortium | Huntington's Disease          | HTT / 46 CAG repeats, HTT / 53 CAG repeats, HTT / 109 CAG repeats | Homo sapiens | 217  | Non-integrating episomal plasmids containing OCT4, SOX2, KLF4, L-MYC, LIN28, and p53                                    | Fibroblast | 2,2,2    | 4,4,4 | No  | Neurons        | <a href="#">GSE95344</a> | Illumina HiSeq 2000) | <a href="#">GPL11154</a> |  |  | <a href="#">PMID: 28319609</a> |
| Neurodegenerative  | Grima              | Huntington's Disease          | HTT / 53 CAG repeats, HTT / 109 CAG repeats                       | Homo sapiens | 2017 | Non-integrating episomal plasmids containing OCT4, SOX2, KLF4, L-MYC, LIN28, and p53                                    | Fibroblast | 1,1      | 1,1   | No  | Neurons        | -                        | -                    | -                        |  |  | <a href="#">PMID: 28384479</a> |
| Neurodevelopmental | Bidinosti          | Phelan-McDermid Syndrome      | SHANK3 / Deletions                                                | Homo sapiens | 2016 | Nonintegrating Sendai virus of OCT4, SOX2, KLF4 and c-MYC                                                               | Fibroblast | 2        | 2     | No  | Neurons        | -                        | -                    | -                        |  |  | <a href="#">PMID: 26847545</a> |

|                    |             |                                                  |                                                                                                    |              |      |                                                                            |            |         |         |    |               |                          |                                          |                          |                                |
|--------------------|-------------|--------------------------------------------------|----------------------------------------------------------------------------------------------------|--------------|------|----------------------------------------------------------------------------|------------|---------|---------|----|---------------|--------------------------|------------------------------------------|--------------------------|--------------------------------|
| Neurodegenerative  | Sivadasan   | Amyotrophic lateral sclerosis                    | C9ORF72 / intronic GGGCC repeats                                                                   | Homo sapiens | 2016 | Retroviruses containing human Oct3/4, Sox2, Klf4, and c-Myc                | Fibroblast | 2       | 2       | No | Neurons       | -                        | -                                        | -                        | <a href="#">PMID: 27723745</a> |
| Neurodevelopmental | Francis     | Smith-Lemli-Opitz syndrome                       | DHCR7 / p.M1V; p.Q98X, DHCR7 / p.T154M; c.964-1G>C, DHCR7 / p.T93M; c.964-1G>C, DHCR7 / c.964-1G>C | Homo sapiens | 2016 | Lentiviral transduction with loxP-flanked STEMCCA polycistronic vector     | Fibroblast | 2,2,4,3 | 4,4,4,4 | No | iPSCs         | <a href="#">GSE61203</a> | Affymetrix Human Exon 1.0 ST Array       | <a href="#">GPL5175</a>  | <a href="#">PMID: 26998835</a> |
| Neurodegenerative  | Dickey      | Huntington's Disease                             | HTT / 60 CAG repeats                                                                               | Homo sapiens | 2016 | Lentiviral transduction of Oct4, Sox2, Klf4, cMyc, Nanog, and Lin28        | Fibroblast | 1       | 1       | No | Neurons       | -                        | -                                        | -                        | <a href="#">PMID: 26642438</a> |
| Neurodegenerative  | Martinez    | Multisystem proteinopathy                        | hnRNPA2/B1 / D290V, VCP / R155H                                                                    | Homo sapiens | 2016 | Nonintegrating Sendai virus of OCT4, SOX2, KLF4 and c-MYC                  | Fibroblast | 3, 2    | 1, 1    | No | Neurons       | <a href="#">GSE86464</a> | Affymetrix Human Transcriptome Array 2.0 | <a href="#">GPL17585</a> | <a href="#">PMID: 27773581</a> |
| Neurodegenerative  | Orellana    | Pantothenate kinase-associated neurodegeneration | PANK2 / c.1259delG, PANK2 / c.569insA                                                              | Homo sapiens | 2016 | Nonintegrating Sendai virus of OCT4, SOX2, KLF4 and c-MYC                  | Fibroblast | 2, 1    | 3, 3    | No | NSCs, Neurons | -                        | -                                        | -                        | <a href="#">PMID: 27516453</a> |
| Neurodegenerative  | Silva       | Frontotemporal dementia                          | MAPT / A152T                                                                                       | Homo sapiens | 2016 | Retroviral vector infection containing human Oct4, Sox2, Klf4, and c-Myc   | Fibroblast | 2       | 2       | No | Neurons       | -                        | -                                        | -                        | <a href="#">PMID: 27594585</a> |
| Neurodevelopmental | Aflaki      | Gaucher Disease                                  | GBA1 / N370S, GBA1 / IVS2+1G>T; L444P                                                              | Homo sapiens | 2016 | Cre-excisable polycistronic lentivirus encoding SOX2, KLF4, OCT4 and c-MYC | Fibroblast | 4, 1    | 1, 1    | No | NSCs, Neurons | -                        | -                                        | -                        | <a href="#">PMID: 27413154</a> |
| Neurodegenerative  | Stanslowsky | Chorea-Acanthocytosis                            | VPS13A / c.4282G>C, VPS13A                                                                         | Homo sapiens | 2016 | Retroviral transduction of Oct4, c-MYC Sox2, Klf4                          | Fibroblast | 1, 1    | 2, 2    | No | Neurons       | -                        | -                                        | -                        | <a href="#">PMID: 27881786</a> |



|                                                                                                                                                                                         |         |                             |                                               |              |      |                                                                                          |            |      |      |     |                     |   |   |   |                                |
|-----------------------------------------------------------------------------------------------------------------------------------------------------------------------------------------|---------|-----------------------------|-----------------------------------------------|--------------|------|------------------------------------------------------------------------------------------|------------|------|------|-----|---------------------|---|---|---|--------------------------------|
|                                                                                                                                                                                         |         |                             | /<br>c.7806G<br>>A                            |              |      |                                                                                          |            |      |      |     |                     |   |   |   |                                |
| Neurodevelopmental                                                                                                                                                                      | Trilck  | Niemann-Pick disease Type C | NPC1 / c.3182T>C, NPC1 / c.1836A>C/c.1628delC | Homo sapiens | 2017 | Retroviral transduction of Oct4, c-MYC Sox2, Klf4                                        | Fibroblast | 1, 1 | 1, 1 | No  | Neurons             | - | - | - | <a href="#">PMID: 27923633</a> |
| Neurodegenerative                                                                                                                                                                       | Hallman | Frontotemporal dementia     | MAPT / N279K                                  | Homo sapiens | 2017 | Lentiviral transduction with a polycistronic vector encoding OCT4, KLF4, SOX2, and C-MYC | Fibroblast | 1    | 1    | Yes | Neurons, Astrocytes | - | - | - | <a href="#">PMID: 28256506</a> |
| Neurodevelopmental                                                                                                                                                                      | Vessoni | Cockayne Syndrome           | ERCC6 / not specific                          | Homo sapiens | 2016 | Non-integrating Sendai vectors containing OCT4, KLF4, SOX2, and C-MYC                    | Fibroblast | 2    | 2    | No  | Neurons             | - | - | - | <a href="#">PMID: 26755826</a> |
| Note: In cases with multiple genes studied, the patient quantities reported under the "Number of Disease Patients Studied" are listed in the same order as the "Gene/ Mutation" column. |         |                             |                                               |              |      |                                                                                          |            |      |      |     |                     |   |   |   |                                |

| Appendix Table S2. <b>Categorical Cluster Descriptions</b>       |                                                                                                                                                                                                                                                                                                                               |
|------------------------------------------------------------------|-------------------------------------------------------------------------------------------------------------------------------------------------------------------------------------------------------------------------------------------------------------------------------------------------------------------------------|
| Impairment of expected cellular functions                        | This category contains any phenotype that can be described by the presence of a disrupted/changed state of a structure or process that is expected and found in a healthy version of the same cell and cannot be described in terms of increases or decreases. i.e. Impaired structure of adherens junctions (PMID: 24996170) |
| Absence of expected normal phenotype                             | This category contains any phenotype that can be described by the complete loss of a function that is found in a healthy version of the same cell. i.e. Absence of random X-inactivation (PMID: 21372419)                                                                                                                     |
| Decreased cellular processes and products                        | This category contains any phenotype that can be described by a decrease in the rate and/or the decreased output of any process and the products it creates within a cell. i.e. Decreased levels of co-localized LC3/LAMP-1 (PMID: 22407749)                                                                                  |
| Increased susceptibility to chemical exposure                    | This category contains any phenotype that can be described by an increase in a cell's susceptibility to death and other harmful events after being exposed to a specific chemical. i.e. Increased susceptibility of neurons to valinomycin (PMID: 22764206)                                                                   |
| Rescue/recovery from disease phenotypes after chemical treatment | This category contains any phenotype that can be described by the returning of a disease phenotype to the normal healthy cellular phenotype after the cell is treated with a certain chemical. i.e. Rescue of aberrant cellular parameters after treatment with LRRK2-In-1 (PMID: 23075850)                                   |
| Presence of abnormal cellular structures                         | This category contains any phenotype that can be described by the observation of a disrupted or altered cellular structure not observed in a healthy cell. i.e. Presence of constricted/ tapered neurites (PMID: 24319659)                                                                                                    |

|                                               |                                                                                                                                                                                                                                                                                            |
|-----------------------------------------------|--------------------------------------------------------------------------------------------------------------------------------------------------------------------------------------------------------------------------------------------------------------------------------------------|
| Decreased susceptibility to chemical exposure | This category contains any phenotype that can be described by the decreased in a cell's susceptibility to death and other harmful events after being exposed to a specific chemical. i.e. Decreased susceptibility to PI3K inhibitor after ectopic progranulin expression (PMID: 23063362) |
| Increased cellular processes and products     | This category contains any phenotype that can be described by an increase in the rate and/or the increased output of any process and the products it creates within a cell. i.e. Increased spontaneous dopamine release (PMID: 22314364)                                                   |
| Accumulation of molecules                     | This category contains any phenotype that can be described by the abnormal accumulation of molecules in a cell not seen in healthy cells. i.e. Accumulation of $\alpha$ -synuclein (PMID: 24905578)                                                                                        |

| Appendix Table S3. Phenotypic Distribution of Categorical Clusters Based on Developmental Stage |           |      |            |                  |       |       |
|-------------------------------------------------------------------------------------------------|-----------|------|------------|------------------|-------|-------|
| Phenotype Categories                                                                            | Cell Type |      |            |                  |       |       |
|                                                                                                 | Neurons   | NSCs | Astrocytes | Oligodendrocytes | iPSCs | Total |
| Rescue/Recovery from Disease Phenotypes After Chemical Treatment                                | 21        | 2    | 0          | 2                | 0     | 25    |
| Accumulation of Molecules                                                                       | 22        | 1    | 3          | 0                | 5     | 31    |
| Absence of Expected Normal Phenotypes                                                           | 4         | 0    | 1          | 0                | 4     | 9     |
| Presence of Abnormal Cellular Structures                                                        | 20        | 2    | 1          | 6                | 9     | 31    |
| Impairment of Expected Cellular Functions                                                       | 23        | 5    | 1          | 4                | 2     | 35    |
| Decreased Cellular Processes and Products                                                       | 197       | 18   | 6          | 4                | 22    | 247   |
| Decreased Susceptibility to Chemical Exposure                                                   | 11        | 0    | 0          | 1                | 0     | 12    |
| Increased Cellular Processes and Products                                                       | 181       | 10   | 17         | 5                | 19    | 232   |
| Increased Susceptibility to Chemical Exposure                                                   | 27        | 1    | 1          | 3                | 2     | 34    |
| Total                                                                                           | 506       | 39   | 22         | 25               | 63    | 663   |

| Appendix Table S4. MeV Plot Phenotypes with Identifying Numbers |                                                                                                                   |
|-----------------------------------------------------------------|-------------------------------------------------------------------------------------------------------------------|
| Number                                                          | Phenotype                                                                                                         |
| 1                                                               | Impairment of neuronal induction of IFN- $\beta$ and IFN- $\gamma$ in response to HSV-1 infection                 |
| 2                                                               | Impairment of neuronal induction of IFN- $\beta$ and IFN- $\gamma$ in response to polyinosinic:polycytidylic acid |
| 3                                                               | Increased susceptibility of neurons to HSV-1 infection                                                            |
| 4                                                               | Decreased susceptibility of neurons to HSV-1 infection after treatment with exogenous IFN- $\alpha$ / $\beta$     |
| 5                                                               | Increased replication speed of HSV-1-GFP in neurons                                                               |
| 6                                                               | Rescued replication speed of HSV-1-GFP in neurons after treatment with IFN- $\alpha$ 2b                           |
| 7                                                               | Rescued replication speed of HSV-1-GFP in neurons after treatment with IFN- $\beta$                               |
| 8                                                               | Decreased amount of basal autophagy in neurons                                                                    |
| 9                                                               | Increased amount of autophagosomes in neurons                                                                     |
| 10                                                              | Presence of fragmented nuclei in neurons                                                                          |
| 11                                                              | Impaired nuclear architecture in neurons                                                                          |
| 12                                                              | Decreased survival of neurons                                                                                     |
| 13                                                              | Decreased motor neuron survival                                                                                   |
| 14                                                              | Impairment of neuronal maturation                                                                                 |
| 15                                                              | Decreased dopamine reuptake by neurons                                                                            |
| 16                                                              | Increased spontaneous dopamine release by neurons                                                                 |
| 17                                                              | Increased secretion of dopamine in neurons                                                                        |
| 18                                                              | Increased secretion of norepinephrine in neurons                                                                  |
| 19                                                              | Decreased amount of neurons expressing lower layer markers (FOXP1 and ETV1)                                       |
| 20                                                              | Increase in sustained calcium ion rise following depolarization of neurons                                        |
| 21                                                              | Impaired calcium channel inactivation in neurons                                                                  |
| 22                                                              | Decreased amount of DAT-binding sites on neurons                                                                  |
| 23                                                              | Decreased electrical excitability of neurons                                                                      |
| 24                                                              | Decreased spike size upon depolarization of neurons                                                               |
| 25                                                              | Increased sodium current in neurons                                                                               |
| 26                                                              | Decrease in frequency/ amplitude of spontaneous postsynaptic currents of neurons                                  |
| 27                                                              | Impaired neuronal network connectivity in glutamatergic neurons                                                   |
| 28                                                              | Decreased amount of neuronal synapses                                                                             |
| 29                                                              | Decreased neuromuscular junction size of neurons                                                                  |
| 30                                                              | Decreased amount of the density of V-GLUT1 puncta in dendrites of neurons                                         |
| 31                                                              | Increased amount of large Rab5+ early endosomes in neurons                                                        |
| 32                                                              | Presence of vacuolated soma in neurons                                                                            |
| 33                                                              | Presence of Lewy neurite/body-like $\alpha$ -synuclein deposition in neurons                                      |
| 34                                                              | Decreased soma size of glutamatergic neurons                                                                      |
| 35                                                              | Decreased spine density in glutamatergic neurons                                                                  |
| 36                                                              | Presence of fewer/smaller end plates in motor neurons                                                             |
| 37                                                              | Decrease in growth cone size in neurons                                                                           |
| 38                                                              | Decreased neuron size                                                                                             |
| 39                                                              | Decrease in mean length of axons in neurons                                                                       |
| 40                                                              | Decrease in length/number of processes in neurons                                                                 |

|    |                                                                                                                  |
|----|------------------------------------------------------------------------------------------------------------------|
| 41 | Decreased neurite outgrowth by forebrain neurons                                                                 |
| 42 | Decrease in length/number of processes extended by forebrain neurons                                             |
| 43 | Decreased motility/slow rate of neurite extension in forebrain neurons                                           |
| 44 | Decreased neurite outgrowth in neurons                                                                           |
| 45 | Decreased average neurite length of DA neurons after exposure to rapamycin                                       |
| 46 | Decreased average neurite length of DA neurons after exposure to leupeptin                                       |
| 47 | Accumulation of monomeric $\alpha$ -synuclein in neurons                                                         |
| 48 | Accumulation of oligomerized $\alpha$ -synuclein in neurons                                                      |
| 49 | Accumulation of monomeric $\alpha$ -synuclein in midbrain dopaminergic neurons                                   |
| 50 | Increase in $\alpha$ -synuclein immunoreactivity in midbrain dopaminergic neurons                                |
| 51 | Accumulation of TDP-43 in neurons                                                                                |
| 52 | Increased percentage of neurons containing cytoplasmic TDP-43                                                    |
| 53 | Increased percentage of neurons with cytoplasmic TDP-43 after exposure to tunicamycin                            |
| 54 | Increased percentage of neurons with cytoplasmic TDP-43 after exposure to staurosporine                          |
| 55 | Increased levels of soluble and detergent-resistant TDP-43 protein in neurons                                    |
| 56 | Presence of SDS-insoluble ATXN3-containing fragments generation in neurons                                       |
| 57 | Partial impairment of $\gamma$ -secretase function in neurons                                                    |
| 58 | Accumulation of A $\beta$ oligomers in neurons                                                                   |
| 59 | Decreased amount of A $\beta$ -oligomers in neurons with $\beta$ -secretase inhibitor treatment                  |
| 60 | Increased A $\beta$ 42/40 ratio in neurons                                                                       |
| 61 | Increased extracellular A $\beta$ 42 in neurons                                                                  |
| 62 | Increased secretion of A $\beta$ (1-40) by neurons                                                               |
| 63 | Increase in basal levels of NO (RNS) in neurons                                                                  |
| 64 | Increased accumulation of NO in neurons after exposure to mitochondrial toxins (Paraquat or Maneb)               |
| 65 | Impaired reduction of mtDNA upon mitochondrial depolarization in neurons                                         |
| 66 | Increase in passive leak of protons from inner mitochondrial membrane of neurons                                 |
| 67 | Decrease in mitochondrion length in the proximal axon of neurons                                                 |
| 68 | Increase in mobility of mitochondria in the proximal axon of neurons                                             |
| 69 | Increase in bidirectional movement of mitochondria in the proximal axon of neurons                               |
| 70 | Decreased recruitment of Parkin to mitochondria in neurons                                                       |
| 71 | Increased electron density in matrix of the inner mitochondrial membrane of neurons                              |
| 72 | Increased perikaryal volume in mitochondria of neurons                                                           |
| 73 | Increased swelling of mitochondrial cristae in the inner mitochondrial membrane of neurons                       |
| 74 | Presence of energy substrate (ATP)- independent respiration in neurons                                           |
| 75 | Impaired maximal rate of mitochondrial respiration in neurons                                                    |
| 76 | Increased ROS levels in basal conditions in neurons                                                              |
| 77 | Decreased mROS production in neurons exposed to low concentrations of valinomycin after treatment with rapamycin |

|     |                                                                                                                                    |
|-----|------------------------------------------------------------------------------------------------------------------------------------|
| 78  | Decreased Basal Oxygen Consumption Rate (OCR) in neurons                                                                           |
| 79  | Increased Basal Oxygen Consumption Rate (OCR) in neurons                                                                           |
| 80  | Absence of nuclear gems (SMN protein nuclear foci) in neurons                                                                      |
| 81  | Decreased levels of extracellular A $\beta$ 42 in neurons                                                                          |
| 82  | Decreased levels of extracellular A $\beta$ 40 in neurons                                                                          |
| 83  | Decreased cell viability in neurons                                                                                                |
| 84  | Partial rescue of cell viability in neurons after treatment with DHA                                                               |
| 85  | Increased levels of binding protein (BiP) in neurons after treatment with high concentrations of DHA                               |
| 86  | Decreased levels of binding protein (BiP) in neurons after treatment with DHA                                                      |
| 87  | Decreased levels of ROS in neurons after treatment with DHA                                                                        |
| 88  | Decreased levels of cleaved caspase-4 in neurons after treatment with DHA                                                          |
| 89  | Decreased levels of binding protein (BiP) in neurons after treatment with $\beta$ -secretase inhibitor                             |
| 90  | Decreased levels of cleaved caspase-4 in neurons after treatment with $\beta$ -secretase inhibitor                                 |
| 91  | Accumulation of RNA foci in neurons                                                                                                |
| 92  | Presence of co-localization of RNA foci in neurons with hnRNPA1                                                                    |
| 93  | Presence of co-localization of RNA foci in neurons with Pur- $\alpha$                                                              |
| 94  | Decreased formation of RNA foci in neurons after treatment with antisense oligonucleotides                                         |
| 95  | Accumulation of intranuclear RNA foci in neurons                                                                                   |
| 96  | Increased susceptibility of neurons to antagonism of the PI3K pathway                                                              |
| 97  | Increased activation of Nrf2 pathway in neurons                                                                                    |
| 98  | Impairment of induced ubiquitination of Mfn2 protein after treatment with valinomycin in neurons                                   |
| 99  | Increased damage to neurons by inhibition of SOH-MEF2C (Sulfenated-myocyte enhancer factor 2C) after exposure to hydrogen peroxide |
| 100 | Increase in LC3-positive puncta (antibody) in neurons                                                                              |
| 101 | Increased positive staining for cleaved caspase-3 in neurons                                                                       |
| 102 | Increased levels of nucleoporin p62 protein in neurons                                                                             |
| 103 | Increased abundance of autophagic vacuoles in neurons                                                                              |
| 104 | Increased levels of pERK in neurons                                                                                                |
| 105 | Increased levels of TAU protein in neurons                                                                                         |
| 106 | Increased levels of phospho-Thr181 TAU in neurons                                                                                  |
| 107 | Increased amount of anti-glycogen synthase kinase 3 beta (aGSK-3 $\beta$ ) in neurons                                              |
| 108 | Increased p-tau/total tau ratios in neurons                                                                                        |
| 109 | Increased MAO A and B transcription in neurons                                                                                     |
| 110 | Increase in PGC-1 $\alpha$ levels in neurons                                                                                       |
| 111 | Increase in very long chain fatty acid (C26:0/C22:0 ratio) levels in neurons                                                       |
| 112 | Increase in fraction of neurons expressing TH                                                                                      |
| 113 | Increased proportion of CTIP2 expressing neurons in lower layer marker (FOXP1 and ETV1) expressing neurons                         |
| 114 | Increased levels of cleaved caspase-4 in neurons                                                                                   |
| 115 | Increased levels of binding protein (BiP) in neurons                                                                               |
| 116 | Increased caspase-3 activity in neurons after exposure to staurosporine                                                            |
| 117 | Increased caspase-3 activity in neurons after exposure to tunicamycin                                                              |
| 118 | Decreased amount of outer mitochondrial membrane (OMM) proteins of                                                                 |

|     |                                                                                                                               |
|-----|-------------------------------------------------------------------------------------------------------------------------------|
|     | increased molecular mass in neurons                                                                                           |
| 119 | Decreased protein expression levels of NURR1 and TH in neurons                                                                |
| 120 | Decreased levels of co-localized LC3/LAMP-1 in neurons                                                                        |
| 121 | Decreased levels of SNCG expression in neurons                                                                                |
| 122 | Decreased expression of C9ORF72 in neurons                                                                                    |
| 123 | Increased levels of S6K2 in neurons after ectopic progranulin expression                                                      |
| 124 | Decreased S6K2 protein levels in neurons                                                                                      |
| 125 | Decreased proportion of SATB2 expressing neurons in lower layer marker (FOXP1 and ETV1) expressing neurons                    |
| 126 | Decreased ATXN3 aggregate formation in neurons after treatment with calpeptin (calpain inhibitor)                             |
| 127 | Decreased ATXN3 aggregate formation in neurons after treatment with ALLN (calpain inhibitor)                                  |
| 128 | Decreased amount of extracellular A $\beta$ 42 by neurons by treatment with a selective A $\beta$ 42-lowering agent           |
| 129 | Decreased amount of extracellular A $\beta$ 42 by neurons after treatment with $\gamma$ -secretase inhibitor                  |
| 130 | Increased amount of A $\beta$ 42 in neurons                                                                                   |
| 131 | Decreased amount of A $\beta$ 42 in neurons after treatment with $\gamma$ -secretase modulator                                |
| 132 | Decreased amount of A $\beta$ 40 in neurons after treatment with $\gamma$ -secretase modulator                                |
| 133 | Decreased amount of A $\beta$ 38 in neurons after treatment with $\gamma$ -secretase modulator                                |
| 134 | Decreased A $\beta$ 42:A $\beta$ 40 ratio in neurons after treatment with $\gamma$ -secretase modulator                       |
| 135 | Decreased amount of extracellular A $\beta$ 42 by neurons after treatment with $\gamma$ -secretase modulator                  |
| 136 | Decreased amount of extracellular A $\beta$ 40 by neurons after treatment with $\gamma$ -secretase modulator                  |
| 137 | Decreased amount of A $\beta$ 42 in neurons after treatment with $\gamma$ -secretase inhibitor                                |
| 138 | Decreased amount of A $\beta$ 40 in neurons after treatment with $\gamma$ -secretase inhibitor                                |
| 139 | Decreased amount of A $\beta$ 38 in neurons after treatment with $\gamma$ -secretase inhibitor                                |
| 140 | Decreased amount of total A $\beta$ in neurons after treatment with $\gamma$ -secretase inhibitor                             |
| 141 | Increased production of A $\beta$ 39 in neurons after treatment with $\gamma$ -secretase modulator                            |
| 142 | Increased production of A $\beta$ 37 in neurons after treatment with $\gamma$ -secretase modulator                            |
| 143 | Increased generation of mROS in neurons after exposure to low concentrations of valinomycin                                   |
| 144 | Decrease production of mROS in neurons in response to valinomycin after treatment with LRRK2 inhibitor GW5074                 |
| 145 | Increase in DA neuron survival in the presence of LRRK2-IN1                                                                   |
| 146 | Decreased susceptibility of neurons to low concentrations of valinomycin induced cell death after treatment with coenzyme Q10 |
| 147 | Decreased susceptibility of neurons to low concentrations of concanamycin A                                                   |



|     |                                                                                                                                       |
|-----|---------------------------------------------------------------------------------------------------------------------------------------|
|     | induced cell death after treatment with coenzyme Q10                                                                                  |
| 148 | Decreased susceptibility of neurons to valinomycin induced cell death after treatment with LRRK2 inhibitor GW5074                     |
| 149 | Decreased susceptibility of neurons to concanamycin A induced cell death after treatment with LRRK2 inhibitor GW5074                  |
| 150 | Decreased susceptibility of neurons to valinomycin induced cell death after treatment with rapamycin                                  |
| 151 | Decreased pERK levels in neurons after treatment with LRRK2-IN1                                                                       |
| 152 | Increased neurite growth rates in neurons after treatment with LRRK2-IN1                                                              |
| 153 | Decreased neuronal oxidative-stress induced cytotoxicity with MEK kinase inhibitor treatment                                          |
| 154 | Increased neurite growth rates after treatment with MEK kinase inhibitor in neurons                                                   |
| 155 | Decreased degeneration of neurons after treatment with MEK kinase inhibitor                                                           |
| 156 | Increased levels of TH and cleaved CASPASE3 double positive neurons after treatment with rotenone                                     |
| 157 | Increased levels of TH and cleaved CASPASE3 double positive neurons after treatment with 6-OHDA                                       |
| 158 | Decreased percent of neurons expressing TH+ after treatment with roscovitine                                                          |
| 159 | Decrease in sustained calcium ion rise following depolarization of neurons after treatment with nimodipine                            |
| 160 | Increased amount of nuclear gems (SMN protein nuclear foci) in neurons after treatment with valproic acid                             |
| 161 | Increased amount of nuclear gems (SMN protein nuclear foci) in neurons after treatment of tobramycin                                  |
| 162 | Increased SMN protein levels in neurons after treatment of valproic acid                                                              |
| 163 | Increased SMN protein levels in neurons after treatment of tobramycin                                                                 |
| 164 | Decreased susceptibility of neurons to PI3K inhibitor after ectopic progranulin expression                                            |
| 165 | Decreased susceptibility to MEK kinase inhibitor after ectopic progranulin expression in neurons                                      |
| 166 | Decreased susceptibility to wortmannin after ectopic progranulin expression in neurons                                                |
| 167 | Increase in glutamatergic synapse amount in neurons after treatment of IGF1                                                           |
| 168 | Increased glutamatergic synapse amount and MeCP2 protein levels in neurons after treatment with gentamicin                            |
| 169 | Decreased p-tau/total tau ratio in neurons after treatment with $\beta$ -secretase inhibitors                                         |
| 170 | Decreased anti-glycogen synthase kinase 3 beta (aGSK-3 $\beta$ ) levels in neurons after treatment with $\beta$ -secretase inhibitors |
| 171 | Decreased amount of oxidative stress in neurons after treatment with $\beta$ -secretase inhibitor                                     |
| 172 | Increased neuronal susceptibility to oxidative stress when cultured in N2 medium without the supplement B27                           |
| 173 | Increased susceptibility of neurons to valinomycin                                                                                    |
| 174 | Increased susceptibility of neurons to MPP+                                                                                           |
| 175 | Increased susceptibility of neurons to concanamycin A                                                                                 |
| 176 | Increased oxidative stress in neurons after exposure to hydrogen peroxide                                                             |

|     |                                                                                                                                       |
|-----|---------------------------------------------------------------------------------------------------------------------------------------|
| 177 | Increased susceptibility of neurons to 6-OHDA exposure (DA neurons)                                                                   |
| 178 | Increased susceptibility of neurons to MG132 exposure (DA neurons)                                                                    |
| 179 | Increased oxidative stress in neurons                                                                                                 |
| 180 | Increased susceptibility of neurons to hydrogen peroxide                                                                              |
| 181 | Increased susceptibility to Manganese ethylnebisdithiocarbamate mediated-apoptosis in neurons                                         |
| 182 | Increased susceptibility to Paraquat mediated-apoptosis in neurons                                                                    |
| 183 | Increased susceptibility of neurons to rotenone mediated-apoptosis                                                                    |
| 184 | Increased susceptibility of neurons to wortmannin                                                                                     |
| 185 | Increased susceptibility of neurons to PI3K inhibitor                                                                                 |
| 186 | Increased susceptibility of neurons to MEK kinase inhibitor                                                                           |
| 187 | Increased susceptibility of neurons to ER stress by tunicamycin                                                                       |
| 188 | Increased susceptibility of neurons to proteasome activity inhibition due to lactacystin                                              |
| 189 | Increased dopamine-induced oxidative stress in neurons                                                                                |
| 190 | Increased amount of TH-positive neurons after exposure to MG132                                                                       |
| 191 | Decreased amount of dopaminergic neurons after exposure to valinomycin                                                                |
| 192 | Decreased amount of dopaminergic neurons after exposure to concanamycin A                                                             |
| 193 | Accumulation of SNCA in dopaminergic neurons                                                                                          |
| 194 | Impairment of mitochondrial translocation of Parkin in neurons after exposure to valinomycin                                          |
| 195 | Decreased levels of intracellular progranulin in neurons                                                                              |
| 196 | Decreased levels of secreted progranulin in neurons                                                                                   |
| 197 | Increased susceptibility in neurons to staurosporine                                                                                  |
| 198 | Increased proportion of neurons expressing upper layer markers (CUX1 and REELIN)                                                      |
| 199 | Decreased ROS in neurons after treatment with $\beta$ -secretase inhibitor                                                            |
| 200 | Impairment of Golgi function in neurons                                                                                               |
| 201 | Impairment of ER function in neurons                                                                                                  |
| 202 | Increased ER stress in neurons                                                                                                        |
| 203 | Increased susceptibility of neuronal intrinsic aberrant protein aggregation and stress                                                |
| 204 | Increased 2',7'- dichlorodihydrofluorescein (DCF) fluorescence in neurons                                                             |
| 205 | Accumulation of abnormal tubulovesicular structures in neurons                                                                        |
| 206 | Presence of repeat-associated non-ATG (RAN) translation products in neurons                                                           |
| 207 | Decreased binding of CFT in neurons                                                                                                   |
| 208 | Decreased levels of SMN protein in neurons                                                                                            |
| 209 | Increased amount of protein carbonyls in neurons                                                                                      |
| 210 | Increased MAO-A and MAO-B enzymatic activities in neurons                                                                             |
| 211 | Impaired reduction of inner mitochondrial membrane area in neurons after exposure to Carbonyl cyanide m-chlorophenyl hydrazone (CCCP) |
| 212 | Decreased secretion levels of A $\beta$ 40 and 42 in neurons after treatment with Dual Antiplatelet Therapy (DAPT)                    |
| 213 | Decreased production of endogenous A $\beta$ 40 in neurons                                                                            |
| 214 | Rescue of PI3k/AKT signaling pathway in neurons after ectopic progranulin expression                                                  |
| 215 | Rescue of MEK/MAPK signaling pathway in neurons after ectopic progranulin                                                             |

|     |                                                                                                                                 |
|-----|---------------------------------------------------------------------------------------------------------------------------------|
|     | expression                                                                                                                      |
| 216 | Decreased levels of glutathione in neurons after exposure to valinomycin                                                        |
| 217 | Decreased levels of glutathione in neurons after exposure to concanamycin A                                                     |
| 218 | Decreased levels of glutathione in neurons after exposure to MPP+                                                               |
| 219 | Decreased levels of glutathione in neurons after exposure to hydrogen peroxide                                                  |
| 220 | Increased susceptibility to caspase-3 activation in neurons                                                                     |
| 221 | Decreased capacity to generate motor neurons                                                                                    |
| 222 | Increased A $\beta$ 38 secretion in neurons                                                                                     |
| 223 | Increased A $\beta$ 38/40 ratio in neurons                                                                                      |
| 224 | Decreased ratio of secreted APPs- $\alpha$ to APPs- $\beta$ in neurons                                                          |
| 225 | Increased generation of APPs- $\alpha$ relative to APPs- $\beta$ in neurons after treatment with $\gamma$ -secretase inhibition |
| 226 | Increased $\beta$ -secretase cleavage at APP in neurons                                                                         |
| 227 | Increased colocalization coefficient of APP with endosomal marker EEA1 in neurons                                               |
| 228 | Increased levels of phospho-Tau at amino acid S262 in neurons                                                                   |
| 229 | Decreased tau protein levels in neurons after treatment with 3D6 antibody                                                       |
| 230 | Decreased Tau protein levels in neurons after treatment with AW7 antibody                                                       |
| 231 | Decrease in size of neurites in neurons                                                                                         |
| 232 | Presence of mild degeneration of neuronal processes                                                                             |
| 233 | Presence of AT8-positive p-TAU in predominant and punctate locations in axons of neurons                                        |
| 234 | Increased amount of caspase-cleaved TAU fragmentation in neurons                                                                |
| 235 | Increased susceptibility to MAPT-induced neurotoxicity in DA neurons                                                            |
| 236 | Increased neurite fragmentation/ degeneration in glutamate neurons                                                              |
| 237 | Increased neurite fragmentation/ degeneration in GABA neurons                                                                   |
| 238 | Increased amount of aberrant dendritic spines in neurons                                                                        |
| 239 | Decreased amount of synaptic contacts in neurons                                                                                |
| 240 | Presence of constricted/ tapered neurites in neurons                                                                            |
| 241 | Increase in detergent-insoluble TDP-43 in neurons                                                                               |
| 242 | Accumulation of TDP-43 pre-inclusion like aggregates in cytoplasm in neurons                                                    |
| 243 | Increased amount of SNRPB2 bound to TDP-43 in neurons                                                                           |
| 244 | Increased amount of TDP-43 insoluble fractions in neurons after exposure to arsenite                                            |
| 245 | Increase in susceptibility of neurons to death after exposure to arsenite                                                       |
| 246 | Decreased susceptibility of neurons to arsenite-induced death after exposure to anacardic acid                                  |
| 247 | Increased neurite length in neurons after exposure to anacardic acid                                                            |
| 248 | Decreased amount of TDP-43 insoluble fractions in neurons after exposure to anacardic acid                                      |
| 249 | Decreased amount of motor neurons                                                                                               |
| 250 | Decreased amount of total cell body volume in neurons                                                                           |
| 251 | Decreased amount of cellular processes from neurons                                                                             |
| 252 | Decreased amount of SMI-32+ neurons at time of late differentiation in neurons                                                  |
| 253 | Increased percentage of apoptotic neurons                                                                                       |
| 254 | Increase activation of initiator procaspase-8 to its cleaved form in neurons                                                    |

|     |                                                                                                                                                     |
|-----|-----------------------------------------------------------------------------------------------------------------------------------------------------|
| 255 | Increased amount of cleaved caspase-8 positive neurons                                                                                              |
| 256 | Increased amount of membrane bound Fas-ligand in neurons                                                                                            |
| 257 | Impairment of the Fas-mediated pathway in motor neurons after exposure to antagonist ZB4 clone of anti-FAS monoclonal antibody (FasNT Ab)           |
| 258 | Impairment of the Fas-mediated pathway in motor neurons after exposure to caspase-3 specific inhibitor Z-DVED-FMK                                   |
| 259 | Increased death of neurons with large CAG expansions                                                                                                |
| 260 | Absence of spontaneously firing neurons after two weeks of differentiation                                                                          |
| 261 | Increased risk of neuronal death                                                                                                                    |
| 262 | Increased risk of neuronal death with BDNF withdrawal                                                                                               |
| 263 | Increase in caspase-3/7 activity in neurons upon BDNF withdrawal                                                                                    |
| 264 | Increased calcium dyshomeostatis in neurons after exposure to pathological glutamate levels                                                         |
| 265 | Increased susceptibility to 3-methyladenine (3-MA) in neurons                                                                                       |
| 266 | Impaired lysosomal system in neurons                                                                                                                |
| 267 | Decreased amount of autophagic flux in neurons                                                                                                      |
| 268 | Impaired intracellular calcium homeostasis in neurons                                                                                               |
| 269 | Impaired autophagosome-lysosome fusion in neurons                                                                                                   |
| 270 | Decreased protein levels of Glucocerebrosidase (Gcase) in neurons                                                                                   |
| 271 | Decreased enzymatic activity of Glucocerebrosidase (Gcase) in neurons                                                                               |
| 272 | Decreased activity of GBA2 in neurons                                                                                                               |
| 273 | Decreased activity of $\beta$ -galactosidase in neurons                                                                                             |
| 274 | Accumulation of lysosomes in neurons (as shown by LAMP1 positive particles)                                                                         |
| 275 | Increased intracellular calcium levels in neurons                                                                                                   |
| 276 | Increased amount of cytosolic calcium induced by caffeine in neurons                                                                                |
| 277 | Increase in RyR-mediated calcium release in neurons                                                                                                 |
| 278 | Increased susceptibility to ER stress in neurons by calcimycin                                                                                      |
| 279 | Increased susceptibility to ER stress in neurons by rotenone                                                                                        |
| 280 | Decreased excitability of neurons                                                                                                                   |
| 281 | Presence of severe axonal degeneration in neurons                                                                                                   |
| 282 | Increased damage to neurons by inhibition of SOH-MEF2C (Sulfenated-myocyte enhancer factor 2C) after exposure to Paraquat                           |
| 283 | Increased damage to neurons by inhibition of SOH-MEF2C (Sulfenated-myocyte enhancer factor 2C) after exposure to Manganese ethylnbisdithiocarbamate |
| 284 | Decreased susceptibility to staurosporine after ectopic progranulin expression in neurons                                                           |
| 285 | Decreased caspase-3 activity in neurons after ectopic progranulin expression                                                                        |
| 286 | Increased mean sodium current densities in neurons                                                                                                  |
| 287 | Decreased threshold for action potential generation in neurons                                                                                      |
| 288 | Increased repetitive firing potential in neurons                                                                                                    |
| 289 | Presence of spontaneous repetitive firing activity in neurons                                                                                       |
| 290 | Increased excitability in neurons                                                                                                                   |
| 291 | Increased amount of depolarized resting membrane potentials (bipolar shaped neurons)                                                                |
| 292 | Decrease in action potentials in marked amplitude attenuation in GABAergic neurons                                                                  |

|     |                                                                                                                                                |
|-----|------------------------------------------------------------------------------------------------------------------------------------------------|
| 293 | Decreased amount of action potential firing in GABAergic neurons                                                                               |
| 294 | Decreased output capacity of GABAergic neurons during intense stimulation                                                                      |
| 295 | Increased neuronal death after exposure to 30 minute glutamate pulses                                                                          |
| 296 | Increased apoptotic susceptibility in dopaminergic neurons                                                                                     |
| 297 | Increased amount of caspase-3 positive TH neurons after exposure to hydrogen peroxide                                                          |
| 298 | Decreased size of motor neurons                                                                                                                |
| 299 | Accumulation of APP-CTFs upon exposure to DAPT in neurons                                                                                      |
| 300 | Accumulation of ER-associated degradation substances (Gcase, Nicastrin) in neurons                                                             |
| 301 | Decreased ratio of post ER-to-ER forms in neurons                                                                                              |
| 302 | Increase in levels of nitrate stress in neurons                                                                                                |
| 303 | Decreased accumulation of ER-associated degradation substrates (Gcase, Nicastrin) in neurons after treatment with NAB2                         |
| 304 | Decreased levels of ER stress in neurons after treatment with NAB2                                                                             |
| 305 | Decreased levels of nitrate stress in neurons after treatment with NAB2                                                                        |
| 306 | Increased ratio of post ER-to-ER forms in neurons after treatment with NAB2                                                                    |
| 307 | Increased cholesterol accumulation in LE/L compartment in neurons                                                                              |
| 308 | Impaired reduction of nSREBP-2 levels in neurons after exposure to HP- $\beta$ -cyclodextrin serum                                             |
| 309 | Decrease in autophagic clearance in neurons (increased p62 and LC3-II levels)                                                                  |
| 310 | Rescue to normal levels of LC3-II in neurons after treatment with bafilomycin A1                                                               |
| 311 | Rescue of defective autophagic levels in neurons after treatment with carbamazepine with or without HP- $\beta$ -cyclodextrin                  |
| 312 | Rescue of defective autophagic levels in neurons after treatment with rapamycin with or without HP- $\beta$ -cyclodextrin                      |
| 313 | Rescue of defective autophagic levels in neurons after treatment with verapamil with or without HP- $\beta$ -cyclodextrin                      |
| 314 | Rescue of defective autophagic levels in neurons after treatment with trehalose with or without HP- $\beta$ -cyclodextrin                      |
| 315 | Increased cell viability in neurons after treatment with carbamazepine with or without HP- $\beta$ -cyclodextrin                               |
| 316 | Increased cell viability in neurons after treatment with rapamycin with or without HP- $\beta$ -cyclodextrin                                   |
| 317 | Increased cell viability in neurons after treatment with trehalose with or without HP- $\beta$ -cyclodextrin                                   |
| 318 | Increased cell viability in neurons after treatment with verapamil with or without HP- $\beta$ -cyclodextrin                                   |
| 319 | Increased mitochondrial fragmentation along neurites of GABA neurons                                                                           |
| 320 | Decreased mitochondrial membrane potential in medium spiny neurons                                                                             |
| 321 | Increased mROS formation in medium spiny neurons                                                                                               |
| 322 | Decreased levels of ATP in medium spiny neurons                                                                                                |
| 323 | Decreased mitochondrial fragmentation along neurites in GABA neurons after treatment with dynamin-related protein 1 peptide inhibitor P110-TAT |
| 324 | Increased neurite length after treatment with dynamin-related protein 1 peptide inhibitor P110-TAT in neurons                                  |
| 325 | Decreased mROS formation in medium spiny neurons after treatment with                                                                          |

|     |                                                                                                                                                             |
|-----|-------------------------------------------------------------------------------------------------------------------------------------------------------------|
|     | dynamin-related protein 1 peptide inhibitor P110-TAT                                                                                                        |
| 326 | Increased mitochondrial membrane potential after treatment with dynamin-related protein 1 peptide inhibitor P110-TAT in medium spiny neurons                |
| 327 | Increased levels of ATP in medium spiny neurons after treatment with dynamin-related protein 1 peptide inhibitor P110-TAT                                   |
| 328 | Decreased levels of mitochondrial associated dynamin-related protein 1 after treatment with dynamin-related protein 1 peptide inhibitor P110-TAT in neurons |
| 329 | Decreased neuronal death upon BDNF withdrawal after treatment with dynamin-related protein 1 peptide inhibitor P110-TAT in neurons                          |
| 330 | Decreased levels of mitochondrial associated p53 after treatment with dynamin-related protein 1 peptide inhibitor P110-TAT in neurons                       |
| 331 | Decrease in proteolysis of long-lived proteins ( $\alpha$ -synuclein, Htt, Tau) in neurons                                                                  |
| 332 | Increased levels of secreted $\alpha$ -synuclein by neurons that can be reuptaken by neighboring neurons                                                    |
| 333 | Accumulation of neurofilament aggregation in motor neurons                                                                                                  |
| 334 | Increase in SOD1 aggregates in cytoplasm, nuclei and neurites of motor neurons                                                                              |
| 335 | Absence of neurofilament aggregation-induced mitochondrial swelling in motor neurons                                                                        |
| 336 | Absence of neurofilament aggregation-induced vacuole formation in motor neurons                                                                             |
| 337 | Increased neurite degeneration in motor neurons                                                                                                             |
| 338 | Recovery of neurofilament subunit proportion (NF-H, NF-M and NF-L) in motor neurons by induction of exogenous NF-L after treatment with Dox (doxycycline)   |
| 339 | Decreased neurofilament aggregation in motor neurons by induction of exogenous NF-L after treatment with Dox (doxycycline)                                  |
| 340 | Decreased neurite degeneration in motor neurons by induction of exogenous NF-L after treatment with Dox (doxycycline)                                       |
| 341 | Decreased nuclear size in neurons                                                                                                                           |
| 342 | Decreased glucocerebrosidase enzymatic activity in neurons                                                                                                  |
| 343 | Accumulation of glucosylsphingolipids in neurons                                                                                                            |
| 344 | Decrease in dendritic length upon depolarization in neurons                                                                                                 |
| 345 | Decreased number of terminals in neurons                                                                                                                    |
| 346 | Decreased number of branch points in neurons                                                                                                                |
| 347 | Decreased neurite complexity in neurons                                                                                                                     |
| 348 | Decreased microtubule stability in neurons                                                                                                                  |
| 349 | Increase in free tubulin in neurons                                                                                                                         |
| 350 | Decrease in polymerized tubulin in pellet fractions in neurons                                                                                              |
| 351 | Decreased neurite length in neurons after treatment with colchicine                                                                                         |
| 352 | Decreased number of terminals in neurons after treatment with colchicine                                                                                    |
| 353 | Decreased number of branch points in neurons after treatment with colchicine                                                                                |
| 354 | Decreased neurite complexity in neurons after treatment with colchicine                                                                                     |
| 355 | Increased neurite length after treatment with taxol in neurons                                                                                              |
| 356 | Increased number of terminals after treatment with taxol in neurons                                                                                         |
| 357 | Increased number of branch points after treatment with taxol in neurons                                                                                     |

|     |                                                                                                                 |
|-----|-----------------------------------------------------------------------------------------------------------------|
| 358 | Increased neurite complexity after treatment with taxol in neurons                                              |
| 359 | Decreased action potential output in motor neurons                                                              |
| 360 | Decreased synaptic input in motor neurons                                                                       |
| 361 | Decreased Na <sup>+</sup> currents in motor neurons                                                             |
| 362 | Decreased K <sup>+</sup> currents in motor neurons                                                              |
| 363 | Decreased synaptic activity in motor neurons                                                                    |
| 364 | Increase in early cell death in neurons                                                                         |
| 365 | Increased cell survival in neurons after treatment with curcumin                                                |
| 366 | Increased cell survival in neurons after treatment with dantrolene                                              |
| 367 | Presence of mis-localized FUS protein in the cytoplasm of motor neurons                                         |
| 368 | Accumulation of FUS cytoplasmic aggregates in motor neurons                                                     |
| 369 | Accumulation of high FUS protein levels within stress granules after treatment with sodium arsenite in neurons  |
| 370 | Accumulation of high FUS protein levels within stress granules after temperature stress in neurons              |
| 371 | Increased fragmentation of TAU protein in neurons                                                               |
| 372 | Increased susceptibility to oxidative stress after treatment with rotenone in neurons                           |
| 373 | Recovery from oxidative stress after treatment with antioxidant coenzyme Q10 in neurons                         |
| 374 | Increased immunoreactivity for AT8 in neurons                                                                   |
| 375 | Recovery from oxidative stress after treatment with GSK-3 inhibitor CHIR99021 in neurons                        |
| 376 | Increased membrane resistance in motor neurons                                                                  |
| 377 | Decrease in Na <sup>+</sup> channel inactivation recovery time in motor neurons                                 |
| 378 | Increased Na <sup>+</sup> current in motor neurons                                                              |
| 379 | Increased input resistance in neurons                                                                           |
| 380 | Decreased amplitude of spontaneous excitatory post-synaptic currents in neurons                                 |
| 381 | Decreased frequency of spontaneous excitatory post-synaptic currents in neurons                                 |
| 382 | Impairment of AMPA-mediated synaptic transmission in neurons                                                    |
| 383 | Impairment of NMDA-mediated synaptic transmission in neurons                                                    |
| 384 | Decreased amplitude of spontaneous synaptic events in neurons                                                   |
| 385 | Decreased frequency of spontaneous synaptic events in neurons                                                   |
| 386 | Decreased current size generation in response to focal application of AMPA in neurons                           |
| 387 | Decreased current size generation in response to focal application of NMDA in neurons                           |
| 388 | Decreased amount of excitatory synapses in neurons                                                              |
| 389 | Increased amplitude of spontaneous excitatory post-synaptic currents after treatment with IGF1 in neurons       |
| 390 | Increased frequency of spontaneous excitatory post-synaptic currents after treatment with IGF1 in neurons       |
| 391 | Decreased input resistance after treatment with IGF1 in neurons                                                 |
| 392 | Increased current size generation in response to focal application of NMDA after treatment with IGF1 in neurons |
| 393 | Restored amplitude of evoked AMPA excitatory post-synaptic currents after treatment with IGF1 in neurons        |

|     |                                                                                                                        |
|-----|------------------------------------------------------------------------------------------------------------------------|
| 394 | Restored amplitude of evoked NMDA excitatory post-synaptic currents after treatment with IGF1 in neurons               |
| 395 | Rescue of synaptic transmission after treatment with IGF1 in neurons                                                   |
| 396 | Increased rate of decay of NMDA-excitatory post-synaptic currents in neurons                                           |
| 397 | Restoration of the number of SYN1 HOMER1 puncta after treatment with IGF1 in neurons                                   |
| 398 | Increase in TUNEL-positive motor neurons                                                                               |
| 399 | Decreased soma size of motor neurons                                                                                   |
| 400 | Decrease in length/number of processes in motor neurons                                                                |
| 401 | Increased levels of soluble SOD1 in motor neurons after treatment with MG132                                           |
| 402 | Accumulation of detergent-insoluble SOD1 in motor neurons after treatment with MG132                                   |
| 403 | Decreased levels of SDHA protein in motor neurons                                                                      |
| 404 | Decreased levels of MT-COX1 protein in motor neurons                                                                   |
| 405 | Decreased amount of motile mitochondria in motor neurons                                                               |
| 406 | Increase in mitochondrial density in processes in motor neurons                                                        |
| 407 | Increased motor neuron survival after treatment with salubrinal                                                        |
| 408 | Decreased survival of motor neurons when cultured with control glia                                                    |
| 409 | Presence of abnormal mitochondrial morphology in motor neurons                                                         |
| 410 | Increased soma size in neurons at one and two weeks post-differentiation                                               |
| 411 | Increased total dendritic length in neurons at one and two weeks post-differentiation                                  |
| 412 | Decreased frequency of excitatory spontaneous synaptic currents in neurons                                             |
| 413 | Decreased density of SV2+ synaptic boutons in neurons                                                                  |
| 414 | Decreased depolarization-induced vesicle release in neurons                                                            |
| 415 | Decreased velocity of actin movement in axonal growth cones of motor neurons                                           |
| 416 | Increased LIMK-1/2 phosphorylation in motor neurons                                                                    |
| 417 | Increased levels of Rac1 in motor neurons                                                                              |
| 418 | Increased cofilin phosphorylation in motor neurons                                                                     |
| 419 | Partial rescue of cell death in neurons after treatment with isoxazole-9                                               |
| 420 | Increased neurite-like processes length in neurons                                                                     |
| 421 | Decreased neurite-like processes length in neurons after treatment with isoxazole-9                                    |
| 422 | Near complete rescue of cell death in neurons after treatment with isoxazole-9                                         |
| 423 | Decreased nuclear:cytoplasmic ratio of endogenous Ran in neurons                                                       |
| 424 | Increased nuclear:cytoplasmic ratio of endogenous MAP2 in neurons                                                      |
| 425 | Decreased nuclear:cytoplasmic ratio of endogenous RanGAP1 in neurons                                                   |
| 426 | Decreased nuclear:cytoplasmic ratio of endogenous NUP62 in neurons                                                     |
| 427 | Decreased medium spiny neuronal death after treatment with KD3010 (PPAR- $\delta$ agonist)                             |
| 428 | Impairment of Akt activity in neurons                                                                                  |
| 429 | Rescue of spontaneous excitatory post-synaptic current frequency in neurons after treatment with SC79 (Akt activator)  |
| 430 | Rescue of spontaneous excitatory post-synaptic current frequency in neurons after treatment with TG003 (Akt activator) |



|     |                                                                                                  |
|-----|--------------------------------------------------------------------------------------------------|
| 431 | Increased levels of exon-10 containing <i>4R-TAU</i> isoforms in neurons                         |
| 432 | Increased levels of insoluble P-tau protein in neurons                                           |
| 433 | Increased levels of insoluble tau in neurons                                                     |
| 434 | Increased levels of polyubiquitinated proteins in neurons                                        |
| 435 | Increased levels of autophagy markers in neurons                                                 |
| 436 | Increased levels of CHOP in neurons                                                              |
| 437 | Decreased cell viability of neurons after exposure to piperidin A                                |
| 438 | Decreased cell viability of neurons after exposure to glutamate                                  |
| 439 | Decreased cell viability of neurons after exposure to NMDA                                       |
| 440 | Decreased cell viability of neurons after exposure to MG132                                      |
| 441 | Decreased cell viability of neurons after exposure to epoxomicin                                 |
| 442 | Decreased cell viability of neurons after exposure to A $\beta$ (1–42)                           |
| 443 | Increased cell viability of neurons after treatment with rapamycin                               |
| 444 | Increased cell viability of neurons exposed to rotenone after treatment with rapamycin           |
| 445 | Increased cell viability of neurons exposed to NMDA after treatment with rapamycin               |
| 446 | Increased cell viability of neurons exposed to A $\beta$ (1-42) after treatment with rapamycin   |
| 447 | Accumulation of cholesterol in cell bodies of neurons                                            |
| 448 | Accumulation of cholesterol in cellular extensions of neurons                                    |
| 449 | Increased co-localization of cholesterol/ GM2 in neurons                                         |
| 450 | Increased accumulation of osmiophilic material in neurons                                        |
| 451 | Increased levels of GM2 in neurons                                                               |
| 452 | Decreased levels of GM3 in neurons                                                               |
| 453 | Increased levels of Hex A mRNA in neurons                                                        |
| 454 | Decreased Hex A enzymatic activity in neurons                                                    |
| 455 | Increased protein levels of Hex A in neurons                                                     |
| 456 | Increased levels of nuclear, insoluble of hnRNP A2/B1 in motor neurons                           |
| 457 | Decreased SRSF7 levels in motor neurons after treatment with an ASO targeting <i>Hnrnpa2b1</i>   |
| 458 | Accumulation of hnRNP A2/B1+ stress granules in motor neurons after exposure to puromycin        |
| 459 | Increased neurite outgrowth in GABAergic medium spiny neurons                                    |
| 460 | Increased neurite ramification in GABAergic medium spiny neurons                                 |
| 461 | Increased Na <sup>+</sup> current amplitudes in medium spiny neurons                             |
| 462 | Decreased voltage dependence of Na <sup>+</sup> channel activation in medium spiny neurons       |
| 463 | Increased amplitude of provoked action potentials in medium spiny neurons                        |
| 464 | Increased amplitude of spontaneous action potentials in medium spiny neurons                     |
| 465 | Increased amplitude of miniature postsynaptic currents in medium spiny neurons                   |
| 466 | Increased percentage of medium spiny neurons showing miniature postsynaptic currents             |
| 467 | Decreased frequency of synaptic currents in medium spiny neurons after treatment with phalloidin |
| 468 | Decreased amplitude of synaptic currents in medium spiny neurons after treatment with phalloidin |

|     |                                                                                                                            |
|-----|----------------------------------------------------------------------------------------------------------------------------|
| 469 | Decreased amplitude of action potentials in medium spiny neurons after treatment with phallocladin                         |
| 470 | Decreased frequency of synaptic currents in medium spiny neurons after treatment with PP2 (Src kinase inhibitor)           |
| 471 | Decreased amplitude of synaptic currents in medium spiny neurons after treatment with PP2 (Src kinase inhibitor)           |
| 472 | Decreased amplitude of action potentials in medium spiny neurons after treatment with PP2 (Src kinase inhibitor)           |
| 473 | Decreased number of medium spiny neurons at time of late differentiation                                                   |
| 474 | Increased G/F-actin ration in medium spiny neurons                                                                         |
| 475 | Increased phosphorylation of cofflin in medium spiny neurons                                                               |
| 476 | Decreased intracellular levels of dopamine in dopaminergic neurons                                                         |
| 477 | Decreased dopamine reuptake in dopaminergic neurons                                                                        |
| 478 | Decreased protein levels of Glucocerebrosidase (Gcase) in dopaminergic neurons                                             |
| 479 | Decreased levels of DAT1 mRNA in dopaminergic neurons                                                                      |
| 480 | Decreased levels of VMAT2 mRNA in dopaminergic neurons                                                                     |
| 481 | Decreased activity levels of Glucocerebrosidase (Gcase) in dopaminergic neurons                                            |
| 482 | Increased protein levels of Glucocerebrosidase (Gcase) in dopaminergic neurons after treatment with NCGC607                |
| 483 | Increased activity levels of Glucocerebrosidase (Gcase) in dopaminergic neurons after treatment with NCGC607               |
| 484 | Increased translocation of Glucocerebrosidase (Gcase) to the lysosome in dopaminergic neurons after treatment with NCGC607 |
| 485 | Increased levels of lysosomal GlcSph in dopaminergic neurons                                                               |
| 486 | Decreased levels of lysosomal GlcSph in dopaminergic neurons after treatment with NCGC607                                  |
| 487 | Presence of $\alpha$ -synuclein in soma of dopaminergic neurons                                                            |
| 488 | Decreased levels of $\alpha$ -synuclein in dopaminergic neurons after treatment with NCGC607                               |
| 489 | Presence of co-localized $\alpha$ -synuclein/Lamp2 in dopaminergic neurons                                                 |
| 490 | Decreased levels of colocalized $\alpha$ -synuclein/Lamp2 in dopaminergic neurons after treatment with NCGC607             |
| 491 | Decreased average maximal firing rate in neurons                                                                           |
| 492 | Presence of abnormal firing activity in neurons after injection of suprathreshold current steps                            |
| 493 | Decreased peak amplitudes of voltage-dependent Na <sup>+</sup> currents in neurons                                         |
| 494 | Presence of abnormal mitochondrial morphology (swollen, damaged cristae) in neurons                                        |
| 495 | Increased proportion of altered mitochondria in neurons                                                                    |
| 496 | Decreased mitochondrial membrane potential in neurons                                                                      |
| 497 | Decreased glutathione levels in neurons                                                                                    |
| 498 | Decreased aconitase activity in neurons                                                                                    |
| 499 | Increased TfR1 levels in neurons                                                                                           |
| 500 | Decreased ferritin levels in neurons                                                                                       |
| 501 | Decreased loss of neurons after treatment with CoA                                                                         |
| 502 | Increased mature firing rate of neurons after treatment with CoA                                                           |
| 503 | Decreased ROS levels in neurons after treatment with CoA                                                                   |

|     |                                                                                                                                                          |
|-----|----------------------------------------------------------------------------------------------------------------------------------------------------------|
| 504 | Decreased synaptic density in neurons                                                                                                                    |
| 505 | Decreased action potential spike number in neurons                                                                                                       |
| 506 | Decreased number of synchronized events in neurons                                                                                                       |
| 507 | Increased nuclear disruption in NSCs (enlarged nuclear area, decrease in circularity, and loss of lamin B1 and B2 on specific folds of nuclear envelope) |
| 508 | Accumulation of intranuclear RNA foci in NSCs                                                                                                            |
| 509 | Decreased clonal expansion in NSCs                                                                                                                       |
| 510 | Increased proteasomal stress in NSCs                                                                                                                     |
| 511 | Presence of spontaneous NSC differentiation at late passages                                                                                             |
| 512 | Impaired induction of IFN- $\beta$ and IFN- $\gamma$ by NSCs after exposure to polyinosinic:polycytidylic acid                                           |
| 513 | Decrease in average Oxygen Consumption Rate (OCR) in NSCs after exposure to Carbonyl cyanide-p-trifluoromethoxypheny (FCCP)                              |
| 514 | Increase in caspase-3/7 activity in NSCs upon growth factor deprivation                                                                                  |
| 515 | Increased susceptibility of NSCs to death after growth factor withdrawal                                                                                 |
| 516 | Increase in TUNEL-positive NSCs                                                                                                                          |
| 517 | Increased apoptosis in NSCs after exposure to MG132                                                                                                      |
| 518 | Partial rescue of normal nuclear morphology in NSCs after treatment with PI3K inhibitor                                                                  |
| 519 | Rescue of aberrant cellular parameters in NSCs after treatment with LRRK2-In-1                                                                           |
| 520 | Decreased phosphorylation of LRRK2 downstream targets in NSCs after treatment with LRRK2-In-1                                                            |
| 521 | Decreased protein levels of N-cadherin in NSCs                                                                                                           |
| 522 | Decreased binding of phalloidin-peptide to actin cytoskeleton in NSCs                                                                                    |
| 523 | Decreased cell-cell adhesion properties in NSCs                                                                                                          |
| 524 | Decreased intracellular ATP (energy metabolism compromised) in NSCs                                                                                      |
| 525 | Decreased ATP/ADP ratios (energy metabolism compromisation) in NSCs                                                                                      |
| 526 | Impaired reductions in HSV-1-GFP replication levels in NSCs after treatment with polyinosinic:polycytidylic acid                                         |
| 527 | Decreased TGF- $\beta$ 1 mRNA in NSCs                                                                                                                    |
| 528 | Increase in sustained calcium ion rise following depolarization of NSCs                                                                                  |
| 529 | Decrease in sustained calcium ion rise following depolarization of NSCs after treatment with nimodipine                                                  |
| 530 | Increased amount of centromeric signals accompanied by reorganization of centromeric heterochromatin in NSCs                                             |
| 531 | Increased phosphorylation of lamin B1 and B2 in NSCs                                                                                                     |
| 532 | Impaired formation of MAP2+ NSCs                                                                                                                         |
| 533 | Presence of aberrant non-neuronal cellular morphology in NSCs                                                                                            |
| 534 | Impaired ability to retain clonogenic and differentiation capacity in NSCs                                                                               |
| 535 | Decreased amount of TUJ1+ NSCs                                                                                                                           |
| 536 | Increased levels of mitochondrial DNA damage in NSCs                                                                                                     |
| 537 | Increased A $\beta$ 42/40 ratio in NSCs                                                                                                                  |
| 538 | Impaired structure of adherens junctions in NSCs                                                                                                         |
| 539 | Decreased amount of A $\beta$ 42 in NSCs after treatment with $\gamma$ -secretase modulator                                                              |
| 540 | Decreased amount of A $\beta$ 40 in NSCs after treatment with $\gamma$ -secretase modulator                                                              |
| 541 | Decreased amount of A $\beta$ 38 in NSCs after treatment with $\gamma$ -secretase                                                                        |

|     |                                                                                                                        |
|-----|------------------------------------------------------------------------------------------------------------------------|
|     | modulator                                                                                                              |
| 542 | Decreased A $\beta$ 42:A $\beta$ 40 ratio in NSCs after treatment with $\gamma$ -secretase modulator                   |
| 543 | Decreased protein levels of Glucocerebrosidase (Gcase) in NSCs                                                         |
| 544 | Decreased activity levels of Glucocerebrosidase (Gcase) in NSCs                                                        |
| 545 | Decreased heme levels in NSCs                                                                                          |
| 546 | Increased electron clear vacuoles under basal conditions in cytoplasm of astrocytes                                    |
| 547 | Accumulated A $\beta$ oligomers in astrocytes                                                                          |
| 548 | Decreased amount of A $\beta$ oligomers in astrocytes after treatment with $\beta$ -secretase inhibitor                |
| 549 | Increased binding protein (BiP) levels in astrocytes                                                                   |
| 550 | Increased ROS levels in basal conditions in astrocytes                                                                 |
| 551 | Increased levels of cleaved caspase-4 in astrocytes                                                                    |
| 552 | Increased ER stress in astrocytes                                                                                      |
| 553 | Increased oxidative stress in astrocytes                                                                               |
| 554 | Decreased levels of binding protein (BiP) in astrocytes after treatment with $\beta$ -secretase inhibitor              |
| 555 | Decreased levels of cleaved caspase-4 in astrocytes after treatment with $\beta$ -secretase inhibitor                  |
| 556 | Increased risk of death in astrocytes under basal conditions                                                           |
| 557 | Presence of mislocalization of TDP-43 protein in cytoplasm of astrocytes                                               |
| 558 | Decreased levels of SMN protein in astrocytes                                                                          |
| 559 | Absence of nuclear gems (SMN protein nuclear foci) in astrocytes                                                       |
| 560 | Accumulation of intranuclear RNA foci in astrocytes                                                                    |
| 561 | Impaired induction of IFN- $\beta$ and IFN- $\gamma$ by astrocytes after exposure to polyinosinic:polycytidylic acid   |
| 562 | Increased amounts of nuclear gems (SMN protein nuclear foci) in astrocytes after treatment with valproic acid          |
| 563 | Increased amounts of nuclear gems (SMN protein nuclear foci) in astrocytes after treatment with tobramycin             |
| 564 | Increased SMN protein levels in astrocytes after treatment with valproic acid                                          |
| 565 | Increased levels of SMN protein levels in astrocytes after treatment with tobramycin                                   |
| 566 | Decrease in ROS in astrocytes after treatment with $\beta$ -secretase inhibitor                                        |
| 567 | Accumulation of soluble TDP-43 in astrocytes                                                                           |
| 568 | Increased levels of exon-10 containing 4R-TAU isoforms in astrocytes                                                   |
| 569 | Increased astrocyte size                                                                                               |
| 570 | Decreased nucleus/cytoplasm ratio in astrocytes                                                                        |
| 571 | Increased levels of ubiquitinated proteins in astrocytes                                                               |
| 572 | Increased susceptibility to oxidative stress in astrocytes                                                             |
| 573 | Increased cell death in astrocytes after exposure to rotenone                                                          |
| 574 | Increased release of lactate dehydrogenase in astrocytes after exposure to rotenone                                    |
| 575 | Increased protein levels of ANXA2 in astrocytes                                                                        |
| 576 | Increased susceptibility of oligodendrocytes to HSV-1 infection                                                        |
| 577 | Decreased susceptibility of oligodendrocytes to HSV-1 infection after treatment with exogenous IFN- $\alpha$ / $\beta$ |
| 578 | Impaired induction of IFN- $\beta$ and IFN- $\gamma$ by oligodendrocytes after exposure to                             |

|     |                                                                                                                                              |
|-----|----------------------------------------------------------------------------------------------------------------------------------------------|
|     | polyinosinic:polycytidylic acid                                                                                                              |
| 579 | Impaired induction of IFN- $\beta$ and IFN- $\gamma$ by oligodendrocytes following HSV-1 infection                                           |
| 580 | Increased replication speed of HSV-1-GFP in oligodendrocytes                                                                                 |
| 581 | Rescued replication speed of HSV-1-GFP in oligodendrocytes after treatment with IFN- $\alpha$ 2b                                             |
| 582 | Rescued replication speed of HSV-1-GFP in oligodendrocytes after treatment with IFN- $\beta$                                                 |
| 583 | Increased very long chain fatty acid (C26:0/C22:0 ratio) levels in oligodendrocytes                                                          |
| 584 | Increased very long chain fatty acid levels in oligodendrocytes compared to AMN ABCD1 (X-linked Adrenoleukodystrophy) mutations              |
| 585 | Decreased C26:0/C22:0 ratio levels in oligodendrocytes by lovastatin (through induced upregulation of ABCD2 gene)                            |
| 586 | Decreased C26:0/C22:0 ratio levels in oligodendrocytes after treatment with 4-PBA (through induced upregulation of ABCD2 gene)               |
| 587 | Presence of mislocalization of PLP1 protein to the ER in oligodendrocytes                                                                    |
| 588 | Increased susceptibility to ER stress induced by exposure to tunicamycin in oligodendrocytes                                                 |
| 589 | Increased amount of apoptotic cells in oligodendrocytes                                                                                      |
| 590 | Decreased frequency of myelin formation in oligodendrocytes                                                                                  |
| 591 | Decreased thickness of myelin sheaths in oligodendrocytes                                                                                    |
| 592 | Presence of aberrant ER morphologies in oligodendrocytes                                                                                     |
| 593 | Impaired induction of MX1 (IFN-inducible molecule) by oligodendrocytes following HSV-1 infection                                             |
| 594 | Impaired induction of NF- $\kappa$ B1 and MX1 (IFN-inducible molecule) by oligodendrocytes after exposure to polyinosinic:polycytidylic acid |
| 595 | Presence of mislocalization of PLP1 protein in the perinuclear cytoplasm in oligodendrocytes                                                 |
| 596 | Presence of colocalization of PLP1 protein with KDEL in oligodendrocytes                                                                     |
| 597 | Increased susceptibility to ER stress in oligodendrocytes                                                                                    |
| 598 | Presence of scatter O4 staining in the processes of oligodendrocytes                                                                         |
| 599 | Increased nuclear condensation in apoptotic oligodendrocytes                                                                                 |
| 600 | Presence of increased ER intermembrane space dilation in oligodendrocytes                                                                    |
| 601 | Decreased expression of cytoskeleton-associated proteins in iPSCs                                                                            |
| 602 | Increased expression of MSH2 enzyme in iPSCs                                                                                                 |
| 603 | Decreased neuronal differentiation in iPSCs                                                                                                  |
| 604 | Presence of premature senescence phenotypes in iPSCs                                                                                         |
| 605 | Increased GAA-TTC repeat instability in iPSCs                                                                                                |
| 606 | Increased susceptibility to oxidative stress in iPSCs                                                                                        |
| 607 | Increased apoptotic cell death in iPSCs through activation of the p53-mediated apoptotic pathway                                             |
| 608 | Increased amount of peroxiredoxin1, peroxiredoxin2 and peroxiredoxin6 in iPSCs                                                               |
| 609 | Decreased formation of TuJ+ iPSCs                                                                                                            |
| 610 | Absence of progerin (truncated splicing mutant of Lamin A) in iPSCs                                                                          |
| 611 | Accumulation of intranuclear RNA foci in iPSCs                                                                                               |
| 612 | Decreased rosette forming efficiency in iPSCs                                                                                                |
| 613 | Increased iPSC death in absence of CSB                                                                                                       |

|     |                                                                                                                                                  |
|-----|--------------------------------------------------------------------------------------------------------------------------------------------------|
| 614 | Increased levels of ROS in iPSCs                                                                                                                 |
| 615 | Decreased growth rate in iPSCs                                                                                                                   |
| 616 | Increased instability of GAA repeats in iPSCs                                                                                                    |
| 617 | Decreased frataxin levels in iPSCs                                                                                                               |
| 618 | Presence of delayed development of electrophysiological functionality in iPSCs                                                                   |
| 619 | Decreased mitochondrial membrane potential in iPSCs                                                                                              |
| 620 | Increased susceptibility of iPSCs to form huntingtin aggregates after exposure to MG132                                                          |
| 621 | Decreased levels of representative antioxidant molecules (Superoxide dismutase1, Glutathione transferase, and Glutathione peroxidase 1) in iPSCs |
| 622 | Increased amount of TUNEL-positive iPSCs                                                                                                         |
| 623 | Increased expression of BTF3 and ATM in iPSCs                                                                                                    |
| 624 | Presence of an aberrant switch of E-cadherin to N-cadherin in iPSCs                                                                              |
| 625 | Presence of abnormal neural rosette during early differentiation in iPSCs                                                                        |
| 626 | Impaired structural integrity in the cell to cell junction (membrane recruitment/microdetachment) in iPSCs                                       |
| 627 | Decreased expression of ATP7A in iPSCs                                                                                                           |
| 628 | Increased distribution of ATP7A molecules throughout cytoplasm in iPSCs                                                                          |
| 629 | Presence of an abnormal reticular distribution of ATP7A in iPSCs                                                                                 |
| 630 | Increased opacity/density embryoid body structures in iPSCs                                                                                      |
| 631 | Presence of abnormal epithelial morphology of attached cells from embryoid bodies in iPSCs                                                       |
| 632 | Impaired gradual decrease of E-cadherin in iPSC derivatives                                                                                      |
| 633 | Decreased expression of NESTIN and aberrant rosette lumens during neurosphere development in iPSCs                                               |
| 634 | Decreased number of N-cad+/ Sox2+ neural rosettes in iPSCs                                                                                       |
| 635 | Absence of differentiation into TuJ1- expressing neurites in iPSCs                                                                               |
| 636 | Absence of differentiation into MAP2- expressing neurites in iPSCs                                                                               |
| 637 | Increased positive staining for Periodic acid-Schiff in iPSCs                                                                                    |
| 638 | Accumulation of glycogen granules in cytoplasm in iPSCs                                                                                          |
| 639 | Decreased amount of glycogen granules after treatment with acid- $\alpha$ -glucosidase in iPSCs                                                  |
| 640 | Decreased amount of A $\beta$ 42 in iPSCs after treatment with $\gamma$ -secretase modulator                                                     |
| 641 | Decreased amount of A $\beta$ 40 in iPSCs after treatment with $\gamma$ -secretase modulator                                                     |
| 642 | Decreased amount of A $\beta$ 38 in iPSCs after treatment with $\gamma$ -secretase modulator                                                     |
| 643 | Decreased A $\beta$ 42:A $\beta$ 40 ratio in iPSCs after treatment with $\gamma$ -secretase modulator                                            |
| 644 | Accumulation of high FUS protein levels within stress granules after treatment with sodium arsenite in iPSCs                                     |
| 645 | Accumulation of high FUS protein levels within stress granules after temperature stress in iPSCs                                                 |
| 646 | Increased punctuate cytoplasmic delocalization of FUS protein in iPSCs                                                                           |
| 647 | Accumulation of high FUS protein levels within stress granules in iPSCs after treatment with sorbitol                                            |

|     |                                                                                                                                                           |
|-----|-----------------------------------------------------------------------------------------------------------------------------------------------------------|
| 648 | Absence of random X-inactivation in iPSCs                                                                                                                 |
| 649 | Increased levels of mitochondrial associated dynamin-related protein 1 in iPSCs                                                                           |
| 650 | Increased levels of mitochondrial associated p53 in iPSCs                                                                                                 |
| 651 | Decreased levels of mitochondrial associated dynamin-related protein 1 after treatment with dynamin-related protein 1 peptide inhibitor P110-TAT in iPSCs |
| 652 | Decreased levels of mitochondrial associated p53 after treatment with dynamin-related protein 1 peptide inhibitor P110-TAT in iPSCs                       |
| 653 | Decreased production of neurons in iPSCs                                                                                                                  |
| 654 | Increased 7-, 8- DHC levels in iPSCs after exposure to cholesterol-deficient mTesR1 medium                                                                |
| 655 | Decreased cholesterol levels in iPSCs after exposure to cholesterol-deficient mTesR1 medium                                                               |
| 656 | Decreased rosette formation in iPSCs                                                                                                                      |
| 657 | Increased rates of neuronal differentiation in iPSCs                                                                                                      |
| 658 | Increased gap and tight junctions in iPSCs cultured in cholesterol-deficient mTesR1 medium after treatment with LDL                                       |
| 659 | Decreased formation of secondary filaments in iPSCs cultured in cholesterol-deficient mTesR1 medium after treatment with LDL                              |
| 660 | Increased formation of rosette structures in iPSCs iPSCs cultured in cholesterol-deficient mTesR1 medium after treatment with LDL                         |
| 661 | Presence of poorly defined SOX2+/ PAX6+ neural rosette structures in iPSCs                                                                                |
| 662 | Presence of long neuronal projections in iPSCs after extended differentiation                                                                             |
| 663 | Presence of spindled neural progenitor-like morphology in iPSCs when cultured in cholesterol-deficient mTesR1 medium                                      |

| Appendix Table S5. Phenotypes by Category with their Network Color |                                                                  |                  |
|--------------------------------------------------------------------|------------------------------------------------------------------|------------------|
| Phenotype Identifier Range                                         | Phenotypic Category                                              | Color in Network |
| 1-25                                                               | Rescue/Recovery from Disease Phenotypes After Chemical Treatment | Light Purple     |
| 26-34                                                              | Absence of Expected Normal Phenotypes                            | Red              |
| 35-65                                                              | Accumulation of Molecules                                        | Orange           |
| 66-103                                                             | Presence of Abnormal Cellular Structures                         | Dark Blue-Violet |
| 104-138                                                            | Impairment of Expected Cellular Functions                        | Pink             |
| 139-150                                                            | Decreased Susceptibility to Chemical Exposure                    | Light Green      |
| 151-184                                                            | Increased Susceptibility to Chemical Exposure                    | Cyan             |
| 185-416                                                            | Increased Cellular Processes and Products                        | Emerald-Green    |
| 417-663                                                            | Decreased Cellular Processes and Products                        | Burnt Yellow     |



| Appendix Table S6. Overlapping Neuronal Phenotypes                                                                               |                                                                                                                                                                                                       |
|----------------------------------------------------------------------------------------------------------------------------------|-------------------------------------------------------------------------------------------------------------------------------------------------------------------------------------------------------|
| Rescued replication speed of HSV-1-GFP in neurons after treatment with IFN- $\alpha$ 2b                                          | Childhood HSE, <i>UNC-93-B</i> , Not Specified<br>Childhood HSE, <i>TLR3</i> , Not Specified                                                                                                          |
| Rescued replication speed of HSV-1-GFP in neurons after treatment with IFN- $\beta$                                              | Childhood HSE, <i>UNC-93-B</i> , Not Specified<br>Childhood HSE, <i>TLR3</i> , Not Specified                                                                                                          |
| Accumulation of monomeric $\alpha$ -synuclein in neurons                                                                         | Gaucher's Disease, <i>GBA1</i> , Not Specified<br>Parkinson's Disease, <i>Parkin</i> , Not Specified<br>Parkinson's Disease, <i>SNCA</i> , Triplication<br>Parkinson's Disease, <i>LRRK2</i> , G2019S |
| Accumulation of A $\beta$ oligomers in neurons                                                                                   | Alzheimer's Disease, <i>APP</i> , E693 $\Delta$<br>Alzheimer's Disease, Sporadic, Not Specified                                                                                                       |
| Accumulation of intranuclear RNA foci in neurons                                                                                 | Frontotemporal Dementia/Amyotrophic Lateral Sclerosis, <i>C9ORF72</i> , GGGGCC Repeats<br>Dystrophia Myotonica type 1, <i>DMPK</i> , Not Specified                                                    |
| Accumulation of SNCA in dopaminergic neurons                                                                                     | Parkinson's Disease, <i>LRRK2</i> , G2019S<br>Parkinson's Disease, <i>SNCA</i> , A53T                                                                                                                 |
| Impaired neuronal network connectivity in glutamatergic neurons                                                                  | Rett's Syndrome, <i>MeCP2</i> , Q244X<br>Pelizaeus-Merzbacher Disease, <i>MAPT</i> , Missense                                                                                                         |
| Decreased susceptibility of neurons to HSV-1 infection after treatment with exogenous IFN- $\alpha$ / $\beta$                    | Childhood HSE, <i>UNC-93-B</i> , Not Specified<br>Childhood HSE, <i>TLR3</i> , Not Specified                                                                                                          |
| Decreased susceptibility of neurons to low concentrations of valinomycin induced cell death after treatment with coenzyme Q10    | Parkinson's Disease, <i>PINK1</i> , Q456X<br>Parkinson's Disease, <i>LRRK2</i> , R1441C<br>Parkinson's Disease, <i>LRRK2</i> , G2019S                                                                 |
| Decreased susceptibility of neurons to low concentrations of concanamycin A induced cell death after treatment with coenzyme Q10 | Parkinson's Disease, <i>PINK1</i> , Q456X<br>Parkinson's Disease, <i>LRRK2</i> , R1441C<br>Parkinson's Disease, <i>LRRK2</i> , G2019S                                                                 |
| Decreased susceptibility of neurons to valinomycin induced cell death after treatment with LRRK2 inhibitor GW5074                | Parkinson's Disease, <i>PINK1</i> , Q456X<br>Parkinson's Disease, <i>LRRK2</i> , R1441C<br>Parkinson's Disease, <i>LRRK2</i> , G2019S                                                                 |
| Increased susceptibility of                                                                                                      | Childhood HSE, <i>UNC-93-B</i> , Not Specified                                                                                                                                                        |

|                                                                    |                                                                                                                                                                                                                                                                                                                     |
|--------------------------------------------------------------------|---------------------------------------------------------------------------------------------------------------------------------------------------------------------------------------------------------------------------------------------------------------------------------------------------------------------|
| neurons to HSV-1 infection                                         | Childhood HSE, <i>TLR3</i> , Not Specified                                                                                                                                                                                                                                                                          |
| Increased susceptibility of neurons to valinomycin                 | Parkinson's Disease, <i>PINK1</i> , Q456X<br>Parkinson's Disease, <i>LRRK2</i> , R1441C<br>Parkinson's Disease, <i>LRRK2</i> , G2019S                                                                                                                                                                               |
| Increased susceptibility of neurons to MPP+                        | Parkinson's Disease, <i>PINK1</i> , Q456X<br>Parkinson's Disease, <i>LRRK2</i> , R1441C<br>Parkinson's Disease, <i>LRRK2</i> , G2019S                                                                                                                                                                               |
| Increased susceptibility of neurons to concanamycin A              | Parkinson's Disease, <i>PINK1</i> , Q456X<br>Parkinson's Disease, <i>LRRK2</i> , R1441C<br>Parkinson's Disease, <i>LRRK2</i> , G2019S                                                                                                                                                                               |
| Increased susceptibility of neurons to MG132 exposure (DA neurons) | Parkinson's Disease, <i>PINK1</i> , Q456X<br>Parkinson's Disease, <i>LRRK2</i> , R1441C<br>Parkinson's Disease, <i>LRRK2</i> , G2019S                                                                                                                                                                               |
| Increased susceptibility of neurons to hydrogen peroxide           | Huntington's Disease, <i>HTT</i> , CAG Repeats<br>Parkinson's Disease, <i>PINK1</i> , Q456X<br>Parkinson's Disease, <i>SNCA</i> , Triplication                                                                                                                                                                      |
| Increased susceptibility of neurons to rotenone mediated-apoptosis | Parkinson's Disease, <i>SNCA</i> , A53T<br>Frontotemporal Dementia, <i>MAPT</i> , N279K<br>Frontotemporal Dementia, <i>MAPT</i> , V337M<br>Frontotemporal Dementia, <i>MAPT</i> , A152T                                                                                                                             |
| Increased amount of autophagosomes in neurons                      | Parkinson's Disease, <i>GBA1</i> , Not Specified<br>Parkinson's Disease, <i>LRRK2</i> , G2019S<br>Niemann- Pick Type C, <i>NPC1</i> , I1061T                                                                                                                                                                        |
| Increased percentage of neurons containing cytoplasmic TDP-43      | Frontotemporal Dementia, <i>PGRN</i> , S116X<br>Amyotrophic Lateral Sclerosis, <i>TDP-43</i> , Q343R<br>Amyotrophic Lateral Sclerosis, <i>TDP-43</i> , M337V                                                                                                                                                        |
| Increased A $\beta$ 42/40 ratio in neurons                         | Alzheimer's Disease, <i>APP</i> , V171L<br>Alzheimer's Disease, <i>APP</i> , V171I<br>Alzheimer's Disease, <i>PSEN1</i> , L166P<br>Alzheimer's Disease, <i>PSEN2</i> , N141I<br>Alzheimer's Disease, <i>PSEN1</i> , M146L<br>Alzheimer's Disease, <i>PSEN1</i> , A246E<br>Alzheimer's Disease, <i>PSEN1</i> , H163R |
| Increased extracellular A $\beta$ 42 in neurons                    | Alzheimer's Disease, <i>PSEN1</i> , L166P<br>Alzheimer's Disease, <i>PSEN2</i> , N141I<br>Alzheimer's Disease, <i>APP</i> , V171L                                                                                                                                                                                   |

|                                                                              |                                                                                                                                                                                                                                                                                                                                                                                                                                                             |
|------------------------------------------------------------------------------|-------------------------------------------------------------------------------------------------------------------------------------------------------------------------------------------------------------------------------------------------------------------------------------------------------------------------------------------------------------------------------------------------------------------------------------------------------------|
| Increased positive staining for cleaved caspase-3 in neurons                 | Parkinson's Disease, <i>LRRK2</i> , G2019S<br>Spinal Muscular Atrophy, <i>SMN1</i> , Not Specified                                                                                                                                                                                                                                                                                                                                                          |
| Increased levels of TAU protein in neurons                                   | Alzheimer's Disease, <i>APP</i> , V171I<br>Parkinson's Disease, <i>LRRK2</i> , G2019S<br>Frontotemporal dementia, <i>MAPT</i> , A152T                                                                                                                                                                                                                                                                                                                       |
| Increase in very long chain fatty acid (C26:0/C22:0 ratio) levels in neurons | X-Linked Adrenoleukodystrophy, <i>ABCD1/ALDP</i> , AMN Patient<br>X-Linked Adrenoleukodystrophy, <i>ABCD1/ALDP</i> , CCALD Patient                                                                                                                                                                                                                                                                                                                          |
| Increased oxidative stress in neurons                                        | Alzheimer's Disease, <i>APP</i> , E693Δ<br>Alzheimer's Disease, Sporadic, Not Specified<br>Parkinson's Disease, <i>LRRK2</i> , G2019S<br>Parkinson's Disease, <i>SNCA</i> , Triplication<br>Parkinson's Disease, <i>Parkin</i> , Not Specified<br>Amyotrophic Lateral Sclerosis, <i>TDP-43</i> , M337V<br>Amyotrophic Lateral Sclerosis, <i>TDP-43</i> , Q343R<br>Parkinson's Disease, <i>PINK1</i> , Q456X<br>Frontotemporal Dementia, <i>MAPT</i> , A152T |
| Increased ER stress in neurons                                               | Alzheimer's Disease, <i>APP</i> , E693Δ<br>Parkinson's Disease, <i>SNCA</i> , Triplication<br>Frontotemporal Dementia, <i>MAPT</i> , V337M<br>Frontotemporal Dementia, <i>MAPT</i> , N279K<br>Alzheimer's Disease, Sporadic, Not Specified                                                                                                                                                                                                                  |
| Increased risk of neuronal death                                             | Niemann-Pick Type C, <i>NPC1</i> , I1061T<br>Huntington's Disease, <i>HTT</i> , CAG Repeats<br>Parkinson's Disease, <i>LRRK2</i> , G2019S<br>Pantothenate kinase-associated neurodegeneration, <i>PANK2</i> , c.1259delG                                                                                                                                                                                                                                    |
| Increased levels of binding protein (BiP) in neurons                         | Alzheimer's Disease, <i>APP</i> , E693Δ<br>Alzheimer's Disease, Sporadic, Not Specified<br>Frontotemporal Dementia, <i>MAPT</i> , A152T                                                                                                                                                                                                                                                                                                                     |
| Increased oxidative stress in neurons after exposure to hydrogen peroxide    | Alzheimer's Disease, <i>APP</i> , E693Δ<br>Parkinson's Disease, <i>LRRK2</i> , G2019S                                                                                                                                                                                                                                                                                                                                                                       |
| Increased ROS levels in basal conditions in neurons                          | Parkinson's Disease, <i>SNCA</i> , A53T<br>Alzheimer's Disease, <i>APP</i> , E693Δ<br>Alzheimer's Disease, Sporadic, Not Specified<br>Pantothenate kinase-associated neurodegeneration, <i>PANK2</i> , c.1259delG<br>Pantothenate kinase-associated neurodegeneration, <i>PANK2</i> , c.569insA                                                                                                                                                             |
| Increased excitability in neurons                                            | Dravet Syndrome, <i>SCN1A</i> , IVS14+3A>T                                                                                                                                                                                                                                                                                                                                                                                                                  |

|                                                                                                                     |                                                                                                                                                                                                                                                                                                                                                                             |
|---------------------------------------------------------------------------------------------------------------------|-----------------------------------------------------------------------------------------------------------------------------------------------------------------------------------------------------------------------------------------------------------------------------------------------------------------------------------------------------------------------------|
|                                                                                                                     | Amyotrophic Lateral Sclerosis, <i>C9ORF72</i> , GGGGCC Repeats<br>Amyotrophic Lateral Sclerosis, <i>TDP-43</i> , M337V<br>Spinal Muscular Atrophy, <i>SMN1</i> , Deletions of exons 7 and 8                                                                                                                                                                                 |
| Increased replication speed of HSV-1-GFP in neurons                                                                 | Childhood HSE, <i>UNC-93-B</i> , Not Specified<br>Childhood HSE, <i>TLR3</i> , Not Specified                                                                                                                                                                                                                                                                                |
| Decreased amount of extracellular A $\beta$ 42 by neurons by treatment with a selective A $\beta$ 42-lowering agent | Alzheimer's Disease, <i>PSEN1</i> , A246E<br>Alzheimer's Disease, <i>PSEN2</i> , N141I                                                                                                                                                                                                                                                                                      |
| Decreased amount of extracellular A $\beta$ 42 by neurons after treatment with $\gamma$ -secretase inhibitor        | Alzheimer's Disease, <i>PSEN1</i> , A246E<br>Alzheimer's Disease, <i>PSEN2</i> , N141I                                                                                                                                                                                                                                                                                      |
| Decreased amount of dopaminergic neurons after exposure to valinomycin                                              | Parkinson's Disease, <i>LRRK2</i> , R1441C<br>Parkinson's Disease, <i>PINK1</i> Q456X                                                                                                                                                                                                                                                                                       |
| Decreased amount of dopaminergic neurons after exposure to concanamycin A                                           | Parkinson's Disease, <i>LRRK2</i> , R1441C<br>Parkinson's Disease, <i>PINK1</i> , Q456X                                                                                                                                                                                                                                                                                     |
| Decreased ROS in neurons after treatment with $\beta$ -secretase inhibitor                                          | Alzheimer's Disease, <i>APP</i> , E693 $\Delta$<br>Alzheimer's Disease, Sporadic, Not Specified                                                                                                                                                                                                                                                                             |
| Decrease in size of neurites                                                                                        | Amyotrophic Lateral Sclerosis, <i>TDP-43</i> , Q343R<br>Amyotrophic Lateral Sclerosis, <i>TDP-43</i> , G298S<br>Amyotrophic Lateral Sclerosis, <i>TDP-43</i> , M337V<br>Parkinson's Disease, <i>Parkin</i> , Deletions on exons 7 and 8<br>Frontotemporal Dementia, <i>MAPT</i> , V337M<br>Frontotemporal Dementia, <i>MAPT</i> , N279K<br>Tauopathies, <i>MAPT</i> , A152T |
| Decreased amount of A $\beta$ -oligomers in neurons with $\beta$ -secretase inhibitor treatment                     | Alzheimer's Disease, <i>APP</i> , E693 $\Delta$<br>Alzheimer's Disease, Sporadic, Not Specified                                                                                                                                                                                                                                                                             |
| Decreased motor neuron survival                                                                                     | Spinal Muscular Atrophy, <i>SMN1</i> , Deletions on exon 7 and 8<br>Amyotrophic Lateral Sclerosis, <i>SOD1</i> , A4V<br>Multisystem proteinopathy, <i>hRNPA2B1</i> , D290V                                                                                                                                                                                                  |
| Decreased neurite outgrowth in neurons                                                                              | Huntington's Disease, <i>HTT</i> , CAG Repeats<br>Spinal Muscular Atrophy, <i>SMN1</i> , Not Specified<br>Parkinson's Disease, <i>LRRK2</i> , G2019S                                                                                                                                                                                                                        |
| Decreased neurite complexity in                                                                                     | Frontotemporal Dementia, <i>MAPT</i> , N279K                                                                                                                                                                                                                                                                                                                                |

|                                                                                                 |                                                                                                                                                                                                     |
|-------------------------------------------------------------------------------------------------|-----------------------------------------------------------------------------------------------------------------------------------------------------------------------------------------------------|
| neurons                                                                                         | Frontotemporal Dementia, <i>MAPT</i> , V337M<br>Parkinson's Disease, <i>Parkin</i> , Deletions on exon 7 and 8                                                                                      |
| Decreased action potential output in motor neurons                                              | Amyotrophic Lateral Sclerosis, <i>C9ORF72</i> , GGGGCC Repeats<br>Amyotrophic Lateral Sclerosis, <i>TDP-43</i> , M337V                                                                              |
| Decreased synaptic input in motor neurons                                                       | Amyotrophic Lateral Sclerosis, <i>C9ORF72</i> , GGGGCC Repeats<br>Amyotrophic Lateral Sclerosis, <i>TDP-43</i> , M337V                                                                              |
| Decrease Na <sup>+</sup> currents in motor neurons                                              | Amyotrophic Lateral Sclerosis, <i>C9ORF72</i> , GGGGCC Repeats<br>Amyotrophic Lateral Sclerosis, <i>TDP-43</i> , M337V                                                                              |
| Decreased K <sup>+</sup> currents in motor neurons                                              | Amyotrophic Lateral Sclerosis, <i>C9ORF72</i> , GGGGCC Repeats<br>Amyotrophic Lateral Sclerosis, <i>TDP-43</i> , M337V                                                                              |
| Decreased synaptic activity in motor neurons                                                    | Amyotrophic Lateral Sclerosis, <i>C9ORF72</i> , GGGGCC Repeats<br>Amyotrophic Lateral Sclerosis, <i>TDP-43</i> , M337V                                                                              |
| Decreased levels of binding protein (BiP) in neurons after treatment with DHA                   | Alzheimer's Disease, <i>APP</i> , E693Δ<br>Alzheimer's Disease, Sporadic, Not Specified                                                                                                             |
| Decreased levels of binding protein (BiP) in neurons after treatment with β-secretase inhibitor | Alzheimer's Disease, <i>APP</i> , E693Δ<br>Alzheimer's Disease, Sporadic, Not Specified                                                                                                             |
| Decreased amount of motor neurons                                                               | Amyotrophic Lateral Sclerosis, <i>SOD1</i> , A4V<br>Spinal Muscular Atrophy, <i>SMN1</i> , Not Specified                                                                                            |
| Increased levels of nuclear, insoluble of hnRNP A2/B1 in motor neurons                          | Multisystem proteinopathy, <i>hRNPA2B1</i> , D290V<br>Multisystem proteinopathy, <i>VCP</i> , R155H                                                                                                 |
| Decreased SRSF7 levels in motor neurons after treatment with an ASO targeting Hnrnpa2b1         | Multisystem proteinopathy, <i>hRNPA2B1</i> , D290V<br>Multisystem proteinopathy, <i>VCP</i> , R155H                                                                                                 |
| Accumulation of hnRNP A2/B1+ stress granules in motor neurons after exposure to puromycin       | Multisystem proteinopathy, <i>hRNPA2B1</i> , D290V<br>Multisystem proteinopathy, <i>VCP</i> , R155H                                                                                                 |
| Decreased Basal Oxygen Consumption Rate (OCR) in neurons                                        | <i>PANK2</i> , c.1259delG<br>Pantothenate kinase-associated neurodegeneration, <i>PANK2</i> , c.569insA<br>Parkinson's Disease, <i>LRRK2</i> , G2019S<br>Parkinson's Disease, <i>LRRK2</i> , R1441C |
| Increased neurite outgrowth in GABAergic medium spiny neurons                                   | Chorea-Acanthocytosis, <i>VPS13A</i> , c.7806G>A<br>Chorea-Acanthocytosis, <i>VPS13A</i> , c.4282G>C                                                                                                |

|                                                                                                                  |                                                                                                      |
|------------------------------------------------------------------------------------------------------------------|------------------------------------------------------------------------------------------------------|
| Increased neurite ramification in GABAergic medium spiny neurons                                                 | Chorea-Acanthocytosis, <i>VPS13A</i> , c.7806G>A<br>Chorea-Acanthocytosis, <i>VPS13A</i> , c.4282G>C |
| Increased Na <sup>+</sup> current amplitudes in medium spiny neurons                                             | Chorea-Acanthocytosis, <i>VPS13A</i> , c.7806G>A<br>Chorea-Acanthocytosis, <i>VPS13A</i> , c.4282G>C |
| Decreased voltage dependence of Na <sup>+</sup> channel activation in medium spiny neurons                       | Chorea-Acanthocytosis, <i>VPS13A</i> , c.7806G>A<br>Chorea-Acanthocytosis, <i>VPS13A</i> , c.4282G>C |
| Increased amplitude of provoked action potentials in medium spiny neurons                                        | Chorea-Acanthocytosis, <i>VPS13A</i> , c.7806G>A<br>Chorea-Acanthocytosis, <i>VPS13A</i> , c.4282G>C |
| Increased amplitude of spontaneous action potentials in medium spiny neurons                                     | Chorea-Acanthocytosis, <i>VPS13A</i> , c.7806G>A<br>Chorea-Acanthocytosis, <i>VPS13A</i> , c.4282G>C |
| Increased amplitude of miniature postsynaptic currents in medium spiny neurons                                   | Chorea-Acanthocytosis, <i>VPS13A</i> , c.7806G>A<br>Chorea-Acanthocytosis, <i>VPS13A</i> , c.4282G>C |
| Increased percentage of medium spiny neurons showing miniature postsynaptic currents                             | Chorea-Acanthocytosis, <i>VPS13A</i> , c.7806G>A<br>Chorea-Acanthocytosis, <i>VPS13A</i> , c.4282G>C |
| Decreased frequency of synaptic currents in medium spiny neurons after treatment with phallacadin                | Chorea-Acanthocytosis, <i>VPS13A</i> , c.7806G>A<br>Chorea-Acanthocytosis, <i>VPS13A</i> , c.4282G>C |
| Decreased amplitude of synaptic currents in medium spiny neurons after treatment with phallacadin                | Chorea-Acanthocytosis, <i>VPS13A</i> , c.7806G>A<br>Chorea-Acanthocytosis, <i>VPS13A</i> , c.4282G>C |
| Decreased amplitude of action potentials in medium spiny neurons after treatment with phallacadin                | Chorea-Acanthocytosis, <i>VPS13A</i> , c.7806G>A<br>Chorea-Acanthocytosis, <i>VPS13A</i> , c.4282G>C |
| Decreased frequency of synaptic currents in medium spiny neurons after treatment with PP2 (Src kinase inhibitor) | Chorea-Acanthocytosis, <i>VPS13A</i> , c.7806G>A<br>Chorea-Acanthocytosis, <i>VPS13A</i> , c.4282G>C |
| Decreased amplitude of synaptic currents in medium spiny neurons after treatment with PP2 (Src kinase inhibitor) | Chorea-Acanthocytosis, <i>VPS13A</i> , c.7806G>A<br>Chorea-Acanthocytosis, <i>VPS13A</i> , c.4282G>C |
| Decreased amplitude of action potentials in medium spiny neurons after treatment with PP2 (Src kinase inhibitor) | Chorea-Acanthocytosis, <i>VPS13A</i> , c.7806G>A<br>Chorea-Acanthocytosis, <i>VPS13A</i> , c.4282G>C |
| Decreased number of medium spiny neurons at time of late differentiation                                         | Chorea-Acanthocytosis, <i>VPS13A</i> , c.7806G>A<br>Chorea-Acanthocytosis, <i>VPS13A</i> , c.4282G>C |
| Increased G/F-actin ration in medium spiny neurons                                                               | Chorea-Acanthocytosis, <i>VPS13A</i> , c.7806G>A<br>Chorea-Acanthocytosis, <i>VPS13A</i> , c.4282G>C |

|                                                                                                 |                                                                                                                                                           |
|-------------------------------------------------------------------------------------------------|-----------------------------------------------------------------------------------------------------------------------------------------------------------|
| Increased phosphorylation of cofilin in medium spiny neurons                                    | Chorea-Acanthocytosis, <i>VPS13A</i> , c.7806G>A<br>Chorea-Acanthocytosis, <i>VPS13A</i> , c.4282G>C                                                      |
| Decreased average maximal firing rate in neurons                                                | Pantothenate kinase-associated neurodegeneration, <i>PANK2</i> , c.1259delG<br>Pantothenate kinase-associated neurodegeneration, <i>PANK2</i> , c.569insA |
| Presence of abnormal firing activity in neurons after injection of suprathreshold current steps | Pantothenate kinase-associated neurodegeneration, <i>PANK2</i> , c.1259delG<br>Pantothenate kinase-associated neurodegeneration, <i>PANK2</i> , c.569insA |
| Decreased peak amplitudes of voltage-dependent Na <sup>+</sup> currents in neurons              | Pantothenate kinase-associated neurodegeneration, <i>PANK2</i> , c.1259delG<br>Pantothenate kinase-associated neurodegeneration, <i>PANK2</i> , c.569insA |
| Presence of abnormal mitochondrial morphology (swollen, damaged cristae) in neurons             | Pantothenate kinase-associated neurodegeneration, <i>PANK2</i> , c.1259delG<br>Pantothenate kinase-associated neurodegeneration, <i>PANK2</i> , c.569insA |
| Increased proportion of altered mitochondria in neurons                                         | Pantothenate kinase-associated neurodegeneration, <i>PANK2</i> , c.1259delG<br>Pantothenate kinase-associated neurodegeneration, <i>PANK2</i> , c.569insA |
| Decreased mitochondrial membrane potential in neurons                                           | Pantothenate kinase-associated neurodegeneration, <i>PANK2</i> , c.1259delG<br>Pantothenate kinase-associated neurodegeneration, <i>PANK2</i> , c.569insA |
| Decreased glutathione levels in neurons                                                         | Pantothenate kinase-associated neurodegeneration, <i>PANK2</i> , c.1259delG<br>Pantothenate kinase-associated neurodegeneration, <i>PANK2</i> , c.569insA |
| Decreased aconitase activity in neurons                                                         | Pantothenate kinase-associated neurodegeneration, <i>PANK2</i> , c.1259delG<br>Pantothenate kinase-associated neurodegeneration, <i>PANK2</i> , c.569insA |
| Increased TfR1 levels in neurons                                                                | Pantothenate kinase-associated neurodegeneration, <i>PANK2</i> , c.1259delG<br>Pantothenate kinase-associated neurodegeneration, <i>PANK2</i> , c.569insA |
| Decreased ferritin levels in neurons                                                            | Pantothenate kinase-associated neurodegeneration, <i>PANK2</i> , c.1259delG<br>Pantothenate kinase-associated neurodegeneration,                          |

|                                                                                |                                                                                                                                                                                 |
|--------------------------------------------------------------------------------|---------------------------------------------------------------------------------------------------------------------------------------------------------------------------------|
|                                                                                | <i>PANK2</i> , c.569insA                                                                                                                                                        |
| Decreased loss of neurons after treatment with CoA                             | Pantothenate kinase-associated neurodegeneration, <i>PANK2</i> , c.1259delG<br>Pantothenate kinase-associated neurodegeneration, <i>PANK2</i> , c.569insA                       |
| Increased mature firing rate of neurons after treatment with CoA               | Pantothenate kinase-associated neurodegeneration, <i>PANK2</i> , c.1259delG<br>Pantothenate kinase-associated neurodegeneration, <i>PANK2</i> , c.569insA                       |
| Decreased ROS levels in neurons after treatment with CoA                       | Pantothenate kinase-associated neurodegeneration, <i>PANK2</i> , c.1259delG<br>Pantothenate kinase-associated neurodegeneration, <i>PANK2</i> , c.569insA                       |
| Accumulation of cholesterol in cell bodies of neurons                          | Niemann-Pick disease Type C, <i>NPC1</i> , c.3182T>C<br>Niemann-Pick disease Type C, <i>NPC1</i> , c.1836A>C/c.1628delC                                                         |
| Accumulation of cholesterol in cellular extensions of neurons                  | Niemann-Pick disease Type C, <i>NPC1</i> , c.3182T>C<br>Niemann-Pick disease Type C, <i>NPC1</i> , c.1836A>C/c.1628delC                                                         |
| Increased co-localization of cholesterol/ GM2 in neurons                       | Niemann-Pick disease Type C, <i>NPC1</i> , c.1180T>C<br>Niemann-Pick disease Type C, <i>NPC1</i> , c.3182T>C<br>Niemann-Pick disease Type C, <i>NPC1</i> , c.1836A>C/c.1628delC |
| Increased accumulation of osmiophilic material in neurons                      | Niemann-Pick disease Type C, <i>NPC1</i> , c.3182T>C<br>Niemann-Pick disease Type C, <i>NPC1</i> , c.1836A>C/c.1628delC                                                         |
| Increased levels of GM2 in neurons                                             | Niemann-Pick disease Type C, <i>NPC1</i> , c.3182T>C<br>Niemann-Pick disease Type C, <i>NPC1</i> , c.1836A>C/c.1628delC                                                         |
| Decreased levels of GM3 in neurons                                             | Niemann-Pick disease Type C, <i>NPC1</i> , c.3182T>C<br>Niemann-Pick disease Type C, <i>NPC1</i> , c.1836A>C/c.1628delC                                                         |
| Increased protein levels of Hex A in neurons                                   | Niemann-Pick disease Type C, <i>NPC1</i> , c.3182T>C<br>Niemann-Pick disease Type C, <i>NPC1</i> , c.1836A>C/c.1628delC                                                         |
| Decreased Hex A enzymatic activity in neurons                                  | Niemann-Pick disease Type C, <i>NPC1</i> , c.1180T>C<br>Niemann-Pick disease Type C, <i>NPC1</i> , c.3182T>C<br>Niemann-Pick disease Type C, <i>NPC1</i> , c.1836A>C/c.1628delC |
| Decreased intracellular levels of dopamine in dopaminergic neurons             | Gaucher Disease, <i>GBA1</i> , VS2+1G>T/L444P<br>Gaucher Disease, <i>GBA1</i> , N370S                                                                                           |
| Decreased protein levels of Glucocerebrosidase (Gcase) in dopaminergic neurons | Gaucher Disease, <i>GBA1</i> , VS2+1G>T/L444P<br>Gaucher Disease, <i>GBA1</i> , N370S                                                                                           |
| Decreased activity levels of                                                   | Gaucher Disease, <i>GBA1</i> , VS2+1G>T/L444P                                                                                                                                   |



|                                                                                                                            |                                                                                       |
|----------------------------------------------------------------------------------------------------------------------------|---------------------------------------------------------------------------------------|
| Glucocerebrosidase (Gcase) in dopaminergic neurons                                                                         | Gaucher Disease, <i>GBA1</i> , N370S                                                  |
| Increased protein levels of Glucocerebrosidase (Gcase) in dopaminergic neurons after treatment with NCGC607                | Gaucher Disease, <i>GBA1</i> , VS2+1G>T/L444P<br>Gaucher Disease, <i>GBA1</i> , N370S |
| Increased activity levels of Glucocerebrosidase (Gcase) in dopaminergic neurons after treatment with NCGC607               | Gaucher Disease, <i>GBA1</i> , VS2+1G>T/L444P<br>Gaucher Disease, <i>GBA1</i> , N370S |
| Increased translocation of Glucocerebrosidase (Gcase) to the lysosome in dopaminergic neurons after treatment with NCGC607 | Gaucher Disease, <i>GBA1</i> , VS2+1G>T/L444P<br>Gaucher Disease, <i>GBA1</i> , N370S |
| Increased levels of lysosomal GlcSph in dopaminergic neurons                                                               | Gaucher Disease, <i>GBA1</i> , VS2+1G>T/L444P<br>Gaucher Disease, <i>GBA1</i> , N370S |
| Decreased levels of lysosomal GlcSph in dopaminergic neurons after treatment with NCGC607                                  | Gaucher Disease, <i>GBA1</i> , VS2+1G>T/L444P<br>Gaucher Disease, <i>GBA1</i> , N370S |
| Presence of $\alpha$ -synuclein in soma of dopaminergic neurons                                                            | Gaucher Disease, <i>GBA1</i> , VS2+1G>T/L444P<br>Gaucher Disease, <i>GBA1</i> , N370S |
| Decreased levels of $\alpha$ -synuclein in dopaminergic neurons after treatment with NCGC607                               | Gaucher Disease, <i>GBA1</i> , VS2+1G>T/L444P<br>Gaucher Disease, <i>GBA1</i> , N370S |
| Presence of co-localized $\alpha$ -synuclein/Lamp2 in dopaminergic neurons                                                 | Gaucher Disease, <i>GBA1</i> , VS2+1G>T/L444P<br>Gaucher Disease, <i>GBA1</i> , N370S |
| Decreased levels of colocalized $\alpha$ -synuclein/Lamp2 in dopaminergic neurons after treatment with NCGC607             | Gaucher Disease, <i>GBA1</i> , VS2+1G>T/L444P<br>Gaucher Disease, <i>GBA1</i> , N370S |

| Appendix Table S7. Overlapping NSC Phenotypes                                               |                                                                                                                                                           |
|---------------------------------------------------------------------------------------------|-----------------------------------------------------------------------------------------------------------------------------------------------------------|
| Accumulation of intranuclear RNA foci in NSCs                                               | Dystrophia Myotonica type 1, <i>DMPK</i> , Not Specified, Frontotemporal Dementia/Amyotrophic Lateral Sclerosis, <i>C9ORF72</i> , GGGGCC Repeats          |
| Decreased amount of TUJ1+ NSCs                                                              | Parkinson's Disease, <i>LRRK2</i> , G2019S<br>Rett Syndrome, <i>MeCP2</i> , Q244X                                                                         |
| Decreased amount of A $\beta$ 42 in NSCs after treatment with $\gamma$ -secretase modulator | Alzheimer's Disease, <i>PSEN1</i> , A246E<br>Alzheimer's Disease, <i>APP</i> , Duplication                                                                |
| Decreased amount of A $\beta$ 40 in NSCs after treatment with $\gamma$ -secretase modulator | Alzheimer's Disease, <i>PSEN1</i> , A246E<br>Alzheimer's Disease, <i>APP</i> , Duplication                                                                |
| Decreased amount of A $\beta$ 38 in NSCs after treatment with $\gamma$ -secretase modulator | Alzheimer's Disease, <i>PSEN1</i> , A246E<br>Alzheimer's Disease, <i>APP</i> , Duplication                                                                |
| Decreased heme levels in NSCs                                                               | Pantothenate kinase-associated neurodegeneration, <i>PANK2</i> , c.1259delG<br>Pantothenate kinase-associated neurodegeneration, <i>PANK2</i> , c.569insA |
| Decreased protein levels of Glucocerebrosidase (Gcase) in NSCs                              | Gaucher Disease, <i>GBA1</i> , N370S<br>Gaucher Disease, <i>GBA1</i> , IVS2+1G>T/L444P                                                                    |
| Decreased activity levels of Glucocerebrosidase (Gcase) in NSCs                             | Gaucher Disease, <i>GBA1</i> , N370S<br>Gaucher Disease, <i>GBA1</i> , IVS2+1G>T/L444P                                                                    |

| Appendix Table S8. Overlapping Astrocyte Phenotypes                                                       |                                                                                                                                                     |
|-----------------------------------------------------------------------------------------------------------|-----------------------------------------------------------------------------------------------------------------------------------------------------|
| Accumulation of intranuclear RNA foci in astrocytes                                                       | Frontotemporal Dementia/ Amyotrophic Lateral Sclerosis, <i>C9ORF72</i> , GGGGCC Repeats<br>Dystrophia Myotonica type 1, <i>DMPK</i> , Not Specified |
| Accumulated A $\beta$ oligomers in astrocytes                                                             | Alzheimer's Disease, <i>APP</i> , E693 $\Delta$<br>Alzheimer's Disease, Sporadic, Not Specified                                                     |
| Increased binding protein (BiP) levels in astrocytes                                                      | Alzheimer's Disease, <i>APP</i> , E693 $\Delta$<br>Alzheimer's Disease, Sporadic, Not Specified                                                     |
| Increased ROS levels in basal conditions in astrocytes                                                    | Alzheimer's Disease, <i>APP</i> , E693 $\Delta$<br>Alzheimer's Disease, Sporadic, Not Specified                                                     |
| Increased ER stress in astrocytes                                                                         | Alzheimer's Disease, <i>APP</i> , E693 $\Delta$<br>Alzheimer's Disease, Sporadic, Not Specified                                                     |
| Increased oxidative stress in astrocytes                                                                  | Alzheimer's Disease, <i>APP</i> , E693 $\Delta$<br>Alzheimer's Disease, Sporadic, Not Specified                                                     |
| Decreased amount of A $\beta$ oligomers in astrocytes after treatment with $\beta$ -secretase inhibitor   | Alzheimer's Disease, <i>APP</i> , E693 $\Delta$<br>Alzheimer's Disease, Sporadic, Not Specified                                                     |
| Decrease in ROS in astrocytes after treatment with $\beta$ -secretase inhibitor                           | Alzheimer's Disease, <i>APP</i> , E693 $\Delta$<br>Alzheimer's Disease, Sporadic, Not Specified                                                     |
| Decreased levels of binding protein (BiP) in astrocytes after treatment with $\beta$ -secretase inhibitor | Alzheimer's Disease, <i>APP</i> , E693 $\Delta$<br>Alzheimer's Disease, Sporadic, Not Specified                                                     |

| <b>Appendix Table S9. Overlapping Oligodendrocyte Phenotypes</b>                                                                       |                                                                                                                                    |
|----------------------------------------------------------------------------------------------------------------------------------------|------------------------------------------------------------------------------------------------------------------------------------|
| Increased very long chain fatty acid (C26:0/C22:0 ratio) levels in oligodendrocytes                                                    | X-Linked Adrenoleukodystrophy, <i>ABCD1/ALDP</i> , AMN Patient<br>X-Linked Adrenoleukodystrophy, <i>ABCD1/ALDP</i> , CCALD Patient |
| Increased very long chain fatty acid levels in oligodendrocytes compared to AMN <i>ABCD1</i> (X-linked Adrenoleukodystrophy) mutations | X-Linked Adrenoleukodystrophy, <i>ABCD1/ALDP</i> , AMN Patient<br>X-Linked Adrenoleukodystrophy, <i>ABCD1/ALDP</i> , CCALD Patient |
| Decreased C26:0/C22:0 ratio levels in oligodendrocytes by lovastatin (through induced upregulation of <i>ABCD2</i> gene)               | X-Linked Adrenoleukodystrophy, <i>ABCD1/ALDP</i> , AMN Patient<br>X-Linked Adrenoleukodystrophy, <i>ABCD1/ALDP</i> , CCALD Patient |
| Decreased C26:0/C22:0 ratio levels in oligodendrocytes after treatment with 4-PBA (through induced upregulation of <i>ABCD2</i> gene)  | X-Linked Adrenoleukodystrophy, <i>ABCD1/ALDP</i> , AMN Patient<br>X-Linked Adrenoleukodystrophy, <i>ABCD1/ALDP</i> , CCALD Patient |

Appendix Table S10. Phenotypic Organization for Cytoscape Network

| Gene            | Node Number | Phenotype                                                                                                                                                 | Level of Evidence |
|-----------------|-------------|-----------------------------------------------------------------------------------------------------------------------------------------------------------|-------------------|
| <i>SOD1</i>     | 1           | Recovery of neurofilament subunit proportion (NF-H, NF-M and NF-L) in motor neurons by induction of exogenous NF-L after treatment with Dox (doxycycline) | 1                 |
| <i>LRRK2</i>    | 2           | Partial rescue of normal nuclear morphology in NSCs after treatment with PI3K inhibitor                                                                   | 1                 |
| <i>LRRK2</i>    | 3           | Rescue of aberrant cellular parameters in NSCs after treatment with LRRK2-In-1                                                                            | 1                 |
| <i>PGRN</i>     | 4           | Rescue of PI3k/AKT signaling pathway in neurons after ectopic progranulin expression                                                                      | 1                 |
| <i>PGRN</i>     | 5           | Rescue of MEK/MAPK signaling pathway in neurons after ectopic progranulin expression                                                                      | 1                 |
| <i>NPC1</i>     | 6           | Rescue to normal levels of LC3-II in neurons after treatment with bafilomycin A1                                                                          | 1                 |
| <i>NPC1</i>     | 7           | Rescue of defective autophagic levels in neurons after treatment with carbamazepine with or without HP- $\beta$ -cyclodextrin                             | 1                 |
| <i>NPC1</i>     | 8           | Rescue of defective autophagic levels in neurons after treatment with rapamycin with or without HP- $\beta$ -cyclodextrin                                 | 1                 |
| <i>NPC1</i>     | 9           | Rescue of defective autophagic levels in neurons after treatment with verapamil with or without HP- $\beta$ -cyclodextrin                                 | 1                 |
| <i>NPC1</i>     | 10          | Rescue of defective autophagic levels in neurons after treatment with trehalose with or without HP- $\beta$ -cyclodextrin                                 | 1                 |
| <i>MAPT</i>     | 11          | Recovery from oxidative stress after treatment with antioxidant coenzyme Q10 in neurons                                                                   | 1                 |
| <i>MAPT</i>     | 12          | Recovery from oxidative stress after treatment with GSK-3 inhibitor CHIR99021 in neurons                                                                  | 1                 |
| <i>SHANK3</i>   | 13          | Rescue of synaptic transmission after treatment with IGF1 in neurons                                                                                      | 1                 |
| <i>APP</i>      | 14          | Partial rescue of cell viability in neurons after treatment with DHA                                                                                      | 1                 |
| <i>UNC-93-B</i> | 15          | Rescued replication speed of HSV-1-GFP in neurons after treatment with IFN- $\alpha$ 2b                                                                   | 1                 |
| <i>TLR3</i>     | 15          | Rescued replication speed of HSV-1-GFP in neurons after treatment with IFN- $\alpha$ 2b                                                                   | 1                 |
| <i>UNC-93-B</i> | 16          | Rescued replication speed of HSV-1-GFP in neurons after treatment with IFN- $\beta$                                                                       | 1                 |
| <i>TLR3</i>     | 16          | Rescued replication speed of HSV-1-GFP in neurons after treatment with IFN- $\beta$                                                                       | 1                 |
| <i>SHANK3</i>   | 17          | Restored amplitude of evoked AMPA excitatory post-synaptic currents after treatment with IGF1 in neurons                                                  | 1                 |
| <i>SHANK3</i>   | 18          | Restored amplitude of evoked NMDA excitatory post-synaptic currents after treatment with IGF1 in neurons                                                  | 1                 |
| <i>SHANK3</i>   | 19          | Restoration of the number of SYN1 HOMER1 puncta after treatment with IGF1 in neurons                                                                      | 1                 |
| <i>UNC-93-B</i> | 20          | Rescued replication speed of HSV-1-GFP in oligodendrocytes after treatment with IFN- $\alpha$ 2b                                                          | 1                 |
| <i>UNC-93-B</i> | 21          | Rescued replication speed of HSV-1-GFP in oligodendrocytes after treatment with IFN- $\beta$                                                              | 1                 |
| <i>SHANK3</i>   | 22          | Rescue of spontaneous excitatory post-synaptic current frequency in neurons after treatment with SC79 (Akt activator)                                     | 1                 |
| <i>SHANK3</i>   | 23          | Rescue of spontaneous excitatory post-synaptic current frequency                                                                                          | 1                 |

|                      |    |                                                                                      |   |
|----------------------|----|--------------------------------------------------------------------------------------|---|
|                      |    | in neurons after treatment with TG003 (Akt activator)                                |   |
| <i>HTT</i>           | 24 | Near complete rescue of cell death in neurons after treatment with isoxazole-9       | 1 |
| <i>HTT</i>           | 25 | Partial rescue of cell death in neurons after treatment with isoxazole-9             | 2 |
| <i>HTT</i>           | 26 | Absence of spontaneously firing neurons after two weeks of differentiation           | 1 |
| <i>LMNA</i>          | 27 | Absence of progerin (truncated splicing mutant of Lamin A) in iPSCs                  | 1 |
| <i>SMN1</i>          | 28 | Absence of nuclear gems (SMN protein nuclear foci) in neurons                        | 1 |
| <i>SMN1</i>          | 29 | Absence of nuclear gems (SMN protein nuclear foci) in astrocytes                     | 1 |
| <i>SOD1</i>          | 30 | Absence of neurofilament aggregation-induced mitochondrial swelling in motor neurons | 1 |
| <i>SOD1</i>          | 31 | Absence of neurofilament aggregation-induced vacuole formation in motor neurons      | 1 |
| <i>MeCP2</i>         | 32 | Absence of random X-inactivation in iPSCs                                            | 1 |
| <i>ATP7A</i>         | 33 | Absence of differentiation into TuJ1- expressing neurites in iPSCs                   | 1 |
| <i>ATP7A</i>         | 34 | Absence of differentiation into MAP2- expressing neurites in iPSCs                   | 1 |
| <i>GAA</i>           | 35 | Accumulation of glycogen granules in cytoplasm in iPSCs                              | 1 |
| <i>GBA1</i>          | 36 | Accumulation of monomeric $\alpha$ -synuclein in neurons                             | 1 |
| <i>Parkin</i>        | 36 | Accumulation of monomeric $\alpha$ -synuclein in neurons                             | 1 |
| <i>SNCA</i>          | 36 | Accumulation of monomeric $\alpha$ -synuclein in neurons                             | 1 |
| <i>LRRK2</i>         | 36 | Accumulation of monomeric $\alpha$ -synuclein in neurons                             | 1 |
| <i>APP</i>           | 37 | Accumulation of A $\beta$ oligomers in neurons                                       | 1 |
| <i>Sporadic (AD)</i> | 37 | Accumulation of A $\beta$ oligomers in neurons                                       | 1 |
| <i>C9ORF72</i>       | 38 | Accumulation of intranuclear RNA foci in neurons                                     | 1 |
| <i>DMPK</i>          | 38 | Accumulation of intranuclear RNA foci in neurons                                     | 1 |
| <i>LRRK2</i>         | 39 | Accumulation of SNCA in dopaminergic neurons                                         | 1 |
| <i>SNCA</i>          | 39 | Accumulation of SNCA in dopaminergic neurons                                         | 1 |
| <i>DMPK</i>          | 40 | Accumulation of intranuclear RNA foci in NSCs                                        | 1 |
| <i>C9ORF72</i>       | 40 | Accumulation of intranuclear RNA foci in NSCs                                        | 1 |
| <i>C9ORF72</i>       | 41 | Accumulation of intranuclear RNA foci in astrocytes                                  | 1 |
| <i>DMPK</i>          | 41 | Accumulation of intranuclear RNA foci in astrocytes                                  | 1 |
| <i>GBA1</i>          | 42 | Accumulation of lysosomes in neurons (as shown by LAMP1 positive particles)          | 1 |
| <i>SNCA</i>          | 43 | Accumulation of oligomerized $\alpha$ -synuclein in neurons                          | 1 |
| <i>SNCA</i>          | 44 | Accumulation of ER-associated degradation substances (Gcase, Nicastrin) in neurons   | 1 |
| <i>Parkin</i>        | 45 | Accumulation of abnormal tubulovesicular structures in neurons                       | 1 |
| <i>DMPK</i>          | 46 | Accumulation of intranuclear RNA foci in iPSCs                                       | 1 |
| <i>TDP-43</i>        | 47 | Accumulation of TDP-43 pre-inclusion like aggregates in cytoplasm in neurons         | 1 |
| <i>TDP-43</i>        | 48 | Accumulation of soluble TDP-43 in astrocytes                                         | 1 |

|                      |    |                                                                                                                |   |
|----------------------|----|----------------------------------------------------------------------------------------------------------------|---|
| <i>C9ORF72</i>       | 49 | Accumulation of RNA foci in neurons                                                                            | 1 |
| <i>TDP-43</i>        | 50 | Accumulation of TDP43 in neurons                                                                               | 1 |
| <i>SOD1</i>          | 51 | Accumulation of neurofilament aggregation in motor neurons                                                     | 1 |
| <i>APP</i>           | 52 | Accumulated A $\beta$ oligomers in astrocytes                                                                  | 1 |
| <i>Sporadic (AD)</i> | 52 | Accumulated A $\beta$ oligomers in astrocytes                                                                  | 1 |
| <i>PSEN1</i>         | 53 | Accumulation of APP-CTFs upon exposure to DAPT in neurons                                                      | 1 |
| <i>GBA1</i>          | 54 | Accumulation of glucosylsphingolipids in neurons                                                               | 1 |
| <i>FUS</i>           | 55 | Accumulation of FUS cytoplasmic aggregates in motor neurons                                                    | 1 |
| <i>FUS</i>           | 56 | Accumulation of high FUS protein levels within stress granules after treatment with sodium arsenite in neurons | 1 |
| <i>FUS</i>           | 57 | Accumulation of high FUS protein levels within stress granules after treatment with sodium arsenite in iPSCs   | 1 |
| <i>FUS</i>           | 58 | Accumulation of high FUS protein levels within stress granules after temperature stress in neurons             | 1 |
| <i>FUS</i>           | 59 | Accumulation of high FUS protein levels within stress granules after temperature stress in iPSCs               | 1 |
| <i>FUS</i>           | 60 | Accumulation of high FUS protein levels within stress granules in iPSCs after treatment with sorbitol          | 1 |
| <i>GBA1</i>          | 61 | Accumulation of monomeric $\alpha$ -synuclein in midbrain dopaminergic neurons                                 | 1 |
| <i>SOD1</i>          | 62 | Accumulation of detergent-insoluble SOD1 in motor neurons after treatment with MG132                           | 1 |
| <i>hnRNPA2B1</i>     | 63 | Accumulation of hnRNP A2/B1+ stress granules in motor neurons after exposure to puromycin                      | 1 |
| <i>VCP</i>           | 63 | Accumulation of hnRNP A2/B1+ stress granules in motor neurons after exposure to puromycin                      | 1 |
| <i>NPC1</i>          | 64 | Accumulation of cholesterol in cell bodies of neurons                                                          | 2 |
| <i>NPC1</i>          | 65 | Accumulation of cholesterol in cellular extensions of neurons                                                  | 2 |
| <i>TDP-43</i>        | 66 | Presence of mislocalization of TDP-43 protein in cytoplasm of astrocytes                                       | 1 |
| <i>SCN1A</i>         | 67 | Presence of spontaneous repetitive firing activity in neurons                                                  | 1 |
| <i>LMNA</i>          | 68 | Presence of premature senescence phenotypes in iPSCs                                                           | 1 |
| <i>FXN</i>           | 69 | Presence of delayed development of electrophysiological functionality in iPSCs                                 | 1 |
| <i>MAPT</i>          | 70 | Presence of mild degeneration of neuronal processes                                                            | 1 |
| <i>MAPT</i>          | 71 | Presence of AT8-positive p-TAU in predominant and punctate locations in axons of neurons                       | 1 |
| <i>MAPT</i>          | 72 | Presence of constricted/ tapered neurites in neurons                                                           | 1 |
| <i>MAPT</i>          | 73 | Presence of severe axonal degeneration in neurons                                                              | 1 |
| <i>PLP1</i>          | 74 | Presence of mislocalization of PLP1 protein to the ER in oligodendrocytes                                      | 1 |
| <i>PLP1</i>          | 75 | Presence of aberrant ER morphologies in oligodendrocytes                                                       | 1 |
| <i>ATP7A</i>         | 76 | Presence of an aberrant switch of E-cadherin to N-cadherin in                                                  | 1 |

|                |     |                                                                                                                      |   |
|----------------|-----|----------------------------------------------------------------------------------------------------------------------|---|
|                |     | iPSCs                                                                                                                |   |
| <i>ATP7A</i>   | 77  | Presence of abnormal neural rosette during early differentiation in iPSCs                                            | 1 |
| <i>ATP7A</i>   | 78  | Presence of an abnormal reticular distribution of ATP7A in iPSCs                                                     | 1 |
| <i>LRRK2</i>   | 79  | Presence of fragmented nuclei in neurons                                                                             | 1 |
| <i>LRRK2</i>   | 80  | Presence of vacuolated soma in neurons                                                                               | 1 |
| <i>LRRK2</i>   | 81  | Presence of spontaneous NSC differentiation at late passages                                                         | 1 |
| <i>LRRK2</i>   | 82  | Presence of aberrant non-neuronal cellular morphology in NSCs                                                        | 1 |
| <i>SNCA</i>    | 83  | Presence of Lewy neurite/body-like $\alpha$ -synuclein deposition in neurons                                         | 1 |
| <i>PINK1</i>   | 84  | Presence of energy substrate (ATP)- independent respiration in neurons                                               | 1 |
| <i>SMN1</i>    | 85  | Presence of fewer/smaller end plates in motor neurons                                                                | 1 |
| <i>ATXN3</i>   | 86  | Presence of SDS-insoluble ATXN3-containing fragments generation in neurons                                           | 1 |
| <i>C9ORF72</i> | 87  | Presence of co-localization of RNA foci in neurons with hnRNPA1                                                      | 1 |
| <i>C9ORF72</i> | 88  | Presence of co-localization of RNA foci in neurons with Pur- $\alpha$                                                | 1 |
| <i>C9ORF72</i> | 89  | Presence of repeat-associated non-ATG (RAN) translation products in neurons                                          | 1 |
| <i>PLP1</i>    | 90  | Presence of mis-localization of PLP1 protein in the perinuclear cytoplasm in oligodendrocytes                        | 1 |
| <i>PLP1</i>    | 91  | Presence of co-localization of PLP1 protein with KDEL in oligodendrocytes                                            | 1 |
| <i>PLP1</i>    | 92  | Presence of scatter O4 staining in the processes of oligodendrocytes                                                 | 1 |
| <i>PLP1</i>    | 93  | Presence of increased ER intermembrane space dilation in oligodendrocytes                                            | 1 |
| <i>FUS</i>     | 94  | Presence of mis-localized FUS protein in the cytoplasm of motor neurons                                              | 1 |
| <i>ATP7A</i>   | 95  | Presence of abnormal epithelial morphology of attached cells from embryoid bodies in iPSCs                           | 1 |
| <i>SOD1</i>    | 96  | Presence of abnormal mitochondrial morphology in motor neurons                                                       | 1 |
| <i>DHCR7</i>   | 97  | Presence of poorly defined SOX2+/ PAX6+ neural rosette structures in iPSCs                                           | 1 |
| <i>DHCR7</i>   | 98  | Presence of long neuronal projections in iPSCs after extended differentiation                                        | 1 |
| <i>DHCR7</i>   | 99  | Presence of spindled neural progenitor-like morphology in iPSCs when cultured in cholesterol-deficient mTesR1 medium | 1 |
| <i>PANK2</i>   | 100 | Presence of abnormal mitochondrial morphology (swollen, damaged cristae) in neurons                                  | 2 |
| <i>GBA1</i>    | 101 | Presence of $\alpha$ -synuclein in soma of dopaminergic neurons                                                      | 2 |
| <i>GBA1</i>    | 102 | Presence of co-localized $\alpha$ -synuclein/Lamp2 in dopaminergic neurons                                           |   |



|                 |     |                                                                                                                                              |   |
|-----------------|-----|----------------------------------------------------------------------------------------------------------------------------------------------|---|
| <i>PANK2</i>    | 103 | Presence of abnormal firing activity in neurons after injection of suprathreshold current steps                                              | 2 |
| <i>CACNA1C</i>  | 104 | Impaired calcium channel inactivation in neurons                                                                                             | 1 |
| <i>ATP7A</i>    | 105 | Impaired structural integrity in the cell to cell junction (membrane recruitment/microdetachment) in iPSCs                                   | 1 |
| <i>ATP7A</i>    | 106 | Impaired gradual decrease of E-cadherin in iPSC derivatives                                                                                  | 1 |
| <i>NPC1</i>     | 107 | Impaired reduction of nSREBP-2 levels in neurons after exposure to HP- $\beta$ -cyclodextrin serum                                           | 1 |
| <i>MeCP2</i>    | 108 | Impaired neuronal network connectivity in glutamatergic neurons                                                                              | 1 |
| <i>MAPT</i>     | 108 | Impaired neuronal network connectivity in glutamatergic neurons                                                                              | 1 |
| <i>UNC-93-B</i> | 109 | Impaired induction of IFN- $\beta$ and IFN- $\gamma$ by NSCs after exposure to polyinosinic:polycytidylic acid                               | 1 |
| <i>UNC-93-B</i> | 110 | Impaired induction of IFN- $\beta$ and IFN- $\gamma$ by astrocytes after exposure to polyinosinic:polycytidylic acid                         | 1 |
| <i>UNC-93-B</i> | 111 | Impaired induction of IFN- $\beta$ and IFN- $\gamma$ by oligodendrocytes after exposure to polyinosinic:polycytidylic acid                   | 1 |
| <i>GBA1</i>     | 112 | Impaired lysosomal system in neurons                                                                                                         | 1 |
| <i>GBA1</i>     | 113 | Impaired intracellular calcium homeostasis in neurons                                                                                        | 1 |
| <i>GBA1</i>     | 114 | Impaired autophagosome-lysosome fusion in neurons                                                                                            | 1 |
| <i>LRRK2</i>    | 115 | Impaired nuclear architecture in neurons                                                                                                     | 1 |
| <i>LRRK2</i>    | 116 | Impaired formation of MAP2+ NSCs                                                                                                             | 1 |
| <i>LRRK2</i>    | 117 | Impaired ability to retain clonogenic and differentiation capacity in NSCs                                                                   | 1 |
| <i>SNCA</i>     | 118 | Impaired maximal rate of mitochondrial respiration in neurons                                                                                | 1 |
| <i>Parkin</i>   | 119 | Impaired reduction of inner mitochondrial membrane area in neurons after exposure to Carbonyl cyanide m-chlorophenyl hydrazone (CCCP)        | 1 |
| <i>PINK1</i>    | 120 | Impaired reduction of mtDNA upon mitochondrial depolarization in neurons                                                                     | 1 |
| <i>UNC-93-B</i> | 121 | Impaired induction of IFN- $\beta$ and IFN- $\gamma$ by oligodendrocytes following HSV-1 infection                                           | 1 |
| <i>UNC-93-B</i> | 122 | Impaired induction of MX1 (IFN-inducible molecule) by oligodendrocytes following HSV-1 infection                                             | 1 |
| <i>UNC-93-B</i> | 123 | Impaired induction of NF- $\kappa$ B1 and MX1 (IFN-inducible molecule) by oligodendrocytes after exposure to polyinosinic:polycytidylic acid | 1 |
| <i>MeCP2</i>    | 124 | Impairment of neuronal maturation                                                                                                            | 1 |
| <i>UNC-93-B</i> | 125 | Impairment of neuronal induction of IFN- $\beta$ and IFN- $\gamma$ in response to polyinosinic:polycytidylic acid                            | 1 |
| <i>APP</i>      | 126 | Impairment of Golgi function in neurons                                                                                                      | 1 |
| <i>APP</i>      | 127 | Impairment of ER function in neurons                                                                                                         | 1 |
| <i>PSEN1</i>    | 128 | Partial impairment of $\gamma$ -secretase function in neurons                                                                                | 1 |
| <i>PINK1</i>    | 129 | Impairment of induced ubiquitination of Mfn2 protein after treatment with valinomycin in neurons                                             | 1 |

|                 |     |                                                                                                                                           |   |
|-----------------|-----|-------------------------------------------------------------------------------------------------------------------------------------------|---|
| <i>PINK1</i>    | 130 | Impairment of mitochondrial translocation of Parkin in neurons after exposure to valinomycin                                              | 1 |
| <i>SMN1</i>     | 131 | Impairment of the Fas-mediated pathway in motor neurons after exposure to antagonist ZB4 clone of anti-FAS monoclonal antibody (FasNT Ab) | 1 |
| <i>SMN1</i>     | 132 | Impairment of the Fas-mediated pathway in motor neurons after exposure to caspase-3 specific inhibitor Z-DVED-FMK                         | 1 |
| <i>UNC-93-B</i> | 133 | Impairment of neuronal induction of IFN- $\beta$ and IFN- $\gamma$ in response to HSV-1 infection                                         | 1 |
| <i>CYFIP1</i>   | 134 | Impaired structure of adherens junctions in NSCs                                                                                          | 1 |
| <i>UNC-93-B</i> | 135 | Impaired reductions in HSV-1-GFP replication levels in NSCs after treatment with polyinosinic:polycytidylic acid                          | 1 |
| <i>SHANK3</i>   | 136 | Impairment of AMPA-mediated synaptic transmission in neurons                                                                              | 1 |
| <i>SHANK3</i>   | 137 | Impairment of NMDA-mediated synaptic transmission in neurons                                                                              | 1 |
| <i>SHANK3</i>   | 138 | Impairment of Akt activity in neurons                                                                                                     | 1 |
| <i>UNC-93-B</i> | 139 | Decreased susceptibility of neurons to HSV-1 infection after treatment with exogenous IFN- $\alpha$ / $\beta$                             | 1 |
| <i>TLR3</i>     | 139 | Decreased susceptibility of neurons to HSV-1 infection after treatment with exogenous IFN- $\alpha$ / $\beta$                             | 1 |
| <i>PINK1</i>    | 140 | Decreased susceptibility of neurons to low concentrations of valinomycin induced cell death after treatment with coenzyme Q10             | 1 |
| <i>LRRK2</i>    | 140 | Decreased susceptibility of neurons to low concentrations of valinomycin induced cell death after treatment with coenzyme Q10             | 2 |
| <i>LRRK2</i>    | 141 | Decreased susceptibility of neurons to low concentrations of concanamycin A induced cell death after treatment with coenzyme Q10          | 2 |
| <i>PINK1</i>    | 141 | Decreased susceptibility of neurons to low concentrations of concanamycin A induced cell death after treatment with coenzyme Q10          | 1 |
| <i>LRRK2</i>    | 142 | Decreased susceptibility of neurons to valinomycin induced cell death after treatment with LRRK2 inhibitor GW5074                         | 2 |
| <i>PINK1</i>    | 142 | Decreased susceptibility of neurons to valinomycin induced cell death after treatment with LRRK2 inhibitor GW5074                         | 1 |
| <i>LRRK2</i>    | 143 | Decreased susceptibility of neurons to concanamycin A induced cell death after treatment with LRRK2 inhibitor GW5074                      | 1 |
| <i>LRRK2</i>    | 144 | Decreased susceptibility of neurons to valinomycin induced cell death after treatment with rapamycin                                      | 1 |
| <i>UNC-93-B</i> | 145 | Decreased susceptibility of oligodendrocytes to HSV-1 infection after treatment with exogenous IFN- $\alpha$ / $\beta$                    | 1 |
| <i>PGRN</i>     | 146 | Decreased susceptibility of neurons to PI3K inhibitor after ectopic progranulin expression                                                | 1 |
| <i>PGRN</i>     | 147 | Decreased susceptibility to MEK kinase inhibitor after ectopic progranulin expression in neurons                                          | 1 |
| <i>PGRN</i>     | 148 | Decreased susceptibility to wortmannin after ectopic progranulin                                                                          | 1 |

|                 |     |                                                                                                |   |
|-----------------|-----|------------------------------------------------------------------------------------------------|---|
|                 |     | expression in neurons                                                                          |   |
| <i>PGRN</i>     | 149 | Decreased susceptibility to staurosporine after ectopic progranulin expression in neurons      | 1 |
| <i>TDP-43</i>   | 150 | Decreased susceptibility of neurons to arsenite-induced death after exposure to anacardic acid | 1 |
| <i>TDP-43</i>   | 151 | Increase in susceptibility of neurons to death after exposure to arsenite                      | 1 |
| <i>LRRK2</i>    | 152 | Increased susceptibility of neurons to 6-OHDA exposure (DA neurons)                            | 1 |
| <i>SNCA</i>     | 153 | Increased apoptotic susceptibility in dopaminergic neurons                                     | 1 |
| <i>UNC-93-B</i> | 154 | Increased susceptibility of neurons to HSV-1 infection                                         | 1 |
| <i>TLR3</i>     | 154 | Increased susceptibility of neurons to HSV-1 infection                                         | 1 |
| <i>LRRK2</i>    | 155 | Increased susceptibility of neurons to valinomycin                                             | 2 |
| <i>PINK1</i>    | 155 | Increased susceptibility of neurons to valinomycin                                             | 1 |
| <i>LRRK2</i>    | 156 | Increased susceptibility of neurons to MPP+                                                    | 2 |
| <i>PINK1</i>    | 156 | Increased susceptibility of neurons to MPP+                                                    | 1 |
| <i>LRRK2</i>    | 157 | Increased susceptibility of neurons to concanamycin A                                          | 2 |
| <i>PINK1</i>    | 157 | Increased susceptibility of neurons to concanamycin A                                          | 1 |
| <i>LRRK2</i>    | 158 | Increased susceptibility of neurons to MG132 exposure (DA neurons)                             | 2 |
| <i>PINK1</i>    | 158 | Increased susceptibility of neurons to MG132 exposure (DA neurons)                             | 1 |
| <i>HTT</i>      | 159 | Increased susceptibility of neurons to hydrogen peroxide                                       | 1 |
| <i>PINK1</i>    | 159 | Increased susceptibility of neurons to hydrogen peroxide                                       | 1 |
| <i>SNCA</i>     | 159 | Increased susceptibility of neurons to hydrogen peroxide                                       | 1 |
| <i>GBA1</i>     | 160 | Increased susceptibility to ER stress in neurons by calcimycin                                 | 1 |
| <i>GBA1</i>     | 161 | Increased susceptibility to ER stress in neurons by rotenone                                   | 1 |
| <i>LRRK2</i>    | 162 | Increased susceptibility to caspase-3 activation in neurons                                    | 1 |
| <i>SNCA</i>     | 163 | Increased susceptibility to Manganese ethylnebisdithiocarbamate mediated-apoptosis in neurons  | 1 |
| <i>SNCA</i>     | 164 | Increased susceptibility to Paraquat mediated-apoptosis in neurons                             | 1 |
| <i>SNCA</i>     | 165 | Increased susceptibility of neurons to rotenone mediated-apoptosis                             | 1 |
| <i>MAPT</i>     | 165 | Increased susceptibility of neurons to rotenone mediated-apoptosis                             | 3 |
| <i>SNCA</i>     | 166 | Increased susceptibility of neuronal intrinsic aberrant protein aggregation and stress         | 1 |
| <i>UNC-93-B</i> | 167 | Increased susceptibility of oligodendrocytes to HSV-1 infection                                | 1 |
| <i>PGRN</i>     | 168 | Increased susceptibility of neurons to wortmannin                                              | 1 |
| <i>PGRN</i>     | 169 | Increased susceptibility of neurons to MEK kinase inhibitor                                    | 1 |
| <i>PGRN</i>     | 170 | Increased susceptibility of neurons to ER stress by tunicamycin                                | 1 |
| <i>PGRN</i>     | 171 | Increased susceptibility of neurons to proteasome activity inhibition due to lactacystin       | 1 |
| <i>PGRN</i>     | 172 | Increased susceptibility in neurons to staurosporine                                           | 1 |
| <i>TDP-43</i>   | 173 | Increased susceptibility of neurons to antagonism of the PI3K                                  | 1 |

|                      |     |                                                                                                             |   |
|----------------------|-----|-------------------------------------------------------------------------------------------------------------|---|
|                      |     | pathway                                                                                                     |   |
| <i>HTT</i>           | 174 | Increased susceptibility to 3-methyladenine (3-MA) in neurons                                               | 1 |
| <i>HTT</i>           | 175 | Increased susceptibility of NSCs to death after growth factor withdrawal                                    | 1 |
| <i>LRRK2</i>         | 176 | Increased neuronal susceptibility to oxidative stress when cultured in N2 medium without the supplement B27 | 1 |
| <i>HTT</i>           | 177 | Increased susceptibility to oxidative stress in iPSCs                                                       | 1 |
| <i>PGRN</i>          | 178 | Increased susceptibility of neurons to PI3K inhibitor                                                       | 1 |
| <i>HTT</i>           | 179 | Increased susceptibility of iPSCs to form huntingtin aggregates after exposure to MG132                     | 1 |
| <i>MAPT</i>          | 180 | Increased susceptibility to MAPT-induced neurotoxicity in DA neurons                                        | 1 |
| <i>PLP1</i>          | 181 | Increased susceptibility to ER stress induced by exposure to tunicamycin in oligodendrocytes                | 1 |
| <i>PLP1</i>          | 182 | Increased susceptibility to ER stress in oligodendrocytes                                                   | 1 |
| <i>MAPT</i>          | 183 | Increased susceptibility to oxidative stress in neurons after treatment with rotenone                       | 1 |
| <i>MAPT</i>          | 184 | Increased susceptibility to oxidative stress in astrocytes                                                  | 1 |
| <i>GBA1</i>          | 185 | Increased amount of autophagosomes in neurons                                                               | 1 |
| <i>LRRK2</i>         | 185 | Increased amount of autophagosomes in neurons                                                               | 1 |
| <i>NPC1</i>          | 185 | Increased amount of autophagosomes in neurons                                                               | 1 |
| <i>PGRN</i>          | 186 | Increased percentage of neurons containing cytoplasmic TDP-43                                               | 1 |
| <i>TDP-43</i>        | 186 | Increased percentage of neurons containing cytoplasmic TDP-43                                               | 2 |
| <i>APP</i>           | 187 | Increased A $\beta$ 42/40 ratio in neurons                                                                  | 2 |
| <i>PSEN2</i>         | 187 | Increased A $\beta$ 42/40 ratio in neurons                                                                  | 1 |
| <i>PSEN1</i>         | 187 | Increased A $\beta$ 42/40 ratio in neurons                                                                  | 4 |
| <i>PSEN1</i>         | 188 | Increased extracellular A $\beta$ 42 in neurons                                                             | 1 |
| <i>PSEN2</i>         | 188 | Increased extracellular A $\beta$ 42 in neurons                                                             | 1 |
| <i>APP</i>           | 188 | Increased extracellular A $\beta$ 42 in neurons                                                             | 1 |
| <i>LRRK2</i>         | 189 | Increased positive staining for cleaved caspase-3 in neurons                                                | 1 |
| <i>SMN1</i>          | 189 | Increased positive staining for cleaved caspase-3 in neurons                                                | 1 |
| <i>APP</i>           | 190 | Increased levels of TAU protein in neurons                                                                  | 1 |
| <i>MAPT</i>          | 190 | Increased levels of TAU protein in neurons                                                                  | 1 |
| <i>LRRK2</i>         | 190 | Increased levels of TAU protein in neurons                                                                  | 1 |
| <i>ABCD1</i>         | 191 | Increase in very long chain fatty acid (C26:0/C22:0 ratio) levels in neurons                                | 1 |
| <i>ALDP</i>          | 191 | Increase in very long chain fatty acid (C26:0/C22:0 ratio) levels in neurons                                | 1 |
| <i>APP</i>           | 192 | Increased oxidative stress in neurons                                                                       | 1 |
| <i>Sporadic (AD)</i> | 192 | Increased oxidative stress in neurons                                                                       | 1 |
| <i>LRRK2</i>         | 192 | Increased oxidative stress in neurons                                                                       | 1 |
| <i>SNCA</i>          | 192 | Increased oxidative stress in neurons                                                                       | 1 |
| <i>Parkin</i>        | 192 | Increased oxidative stress in neurons                                                                       | 1 |

|                      |     |                                                                                                                                 |   |
|----------------------|-----|---------------------------------------------------------------------------------------------------------------------------------|---|
| <i>TDP-43</i>        | 192 | Increased oxidative stress in neurons                                                                                           | 2 |
| <i>PINK1</i>         | 192 | Increased oxidative stress in neurons                                                                                           | 1 |
| <i>MAPT</i>          | 192 | Increased oxidative stress in neurons                                                                                           | 1 |
| <i>APP</i>           | 193 | Increased ER stress in neurons                                                                                                  | 1 |
| <i>SNCA</i>          | 193 | Increased ER stress in neurons                                                                                                  | 1 |
| <i>MAPT</i>          | 193 | Increased ER stress in neurons                                                                                                  | 2 |
| <i>Sporadic (AD)</i> | 193 | Increased ER stress in neurons                                                                                                  | 1 |
| <i>NPC1</i>          | 194 | Increased risk of neuronal death                                                                                                | 1 |
| <i>HTT</i>           | 194 | Increased risk of neuronal death                                                                                                | 3 |
| <i>LRRK2</i>         | 194 | Increased risk of neuronal death                                                                                                | 1 |
| <i>PANK2</i>         | 194 | Increased risk of neuronal death                                                                                                | 1 |
| <i>ABCD1</i>         | 195 | Increased very long chain fatty acid (C26:0/C22:0 ratio) levels in oligodendrocytes                                             | 1 |
| <i>ALDP</i>          | 195 | Increased very long chain fatty acid (C26:0/C22:0 ratio) levels in oligodendrocytes                                             | 1 |
| <i>APP</i>           | 196 | Increased levels of cleaved caspase-4 in neurons                                                                                | 1 |
| <i>APP</i>           | 197 | Increased levels of binding protein (BiP) in neurons                                                                            | 1 |
| <i>Sporadic (AD)</i> | 197 | Increased levels of binding protein (BiP) in neurons                                                                            | 1 |
| <i>MAPT</i>          | 197 | Increased levels of binding protein (BiP) in neurons                                                                            | 1 |
| <i>APP</i>           | 198 | Increased amount of large Rab5+ early endosomes in neurons                                                                      | 1 |
| <i>APP</i>           | 199 | Increased A $\beta$ 38 secretion in neurons                                                                                     | 1 |
| <i>APP</i>           | 200 | Increased A $\beta$ 38/40 ratio in neurons                                                                                      | 1 |
| <i>APP</i>           | 201 | Increased generation of APPs- $\alpha$ relative to APPs- $\beta$ in neurons after treatment with $\gamma$ -secretase inhibition | 1 |
| <i>APP</i>           | 202 | Increased $\beta$ -secretase cleavage at APP in neurons                                                                         | 1 |
| <i>APP</i>           | 203 | Increased colocalization coefficient of APP with endosomal marker EEA1 in neurons                                               | 1 |
| <i>APP</i>           | 204 | Increased levels of phospho-Tau at amino acid S262 in neurons                                                                   | 1 |
| <i>APP</i>           | 205 | Increased secretion of A $\beta$ (1-40) by neurons                                                                              | 1 |
| <i>APP</i>           | 206 | Increased amount of anti-glycogen synthase kinase 3 beta (aGSK-3 $\beta$ ) in neurons                                           | 1 |
| <i>APP</i>           | 207 | Increased p-tau/total tau ratios in neurons                                                                                     | 1 |
| <i>GBA1</i>          | 208 | Increased intracellular calcium levels in neurons                                                                               | 1 |
| <i>GBA1</i>          | 209 | Increased amount of cytosolic calcium induced by caffeine in neurons                                                            | 1 |
| <i>GBA1</i>          | 210 | Increase in RyR-mediated calcium release in neurons                                                                             | 1 |
| <i>LRRK2</i>         | 211 | Increase in bidirectional movement of mitochondria in the proximal axon of neurons                                              | 1 |
| <i>LRRK2</i>         | 212 | Increase in LC3-positive puncta (antibody) in neurons                                                                           | 1 |
| <i>LRRK2</i>         | 213 | Increased levels of nucleoporin p62 protein in neurons                                                                          | 1 |
| <i>LRRK2</i>         | 214 | Increased abundance of autophagic vacuoles in neurons                                                                           | 1 |
| <i>LRRK2</i>         | 215 | Increased amount of TH-positive neurons after exposure to MG132                                                                 | 1 |
| <i>LRRK2</i>         | 216 | Increased levels of pERK in neurons                                                                                             | 1 |

|                      |     |                                                                                                                                                          |   |
|----------------------|-----|----------------------------------------------------------------------------------------------------------------------------------------------------------|---|
| <i>LRRK2</i>         | 217 | Increased levels of phospho-Thr181 TAU in neurons                                                                                                        | 1 |
| <i>LRRK2</i>         | 218 | Increase in DA neuron survival in the presence of LRRK2-IN1                                                                                              | 1 |
| <i>LRRK2</i>         | 219 | Increased neurite growth rates in neurons after treatment with LRRK2-IN1                                                                                 | 1 |
| <i>LRRK2</i>         | 220 | Increased neurite growth rates after treatment with MEK kinase inhibitor in neurons                                                                      | 1 |
| <i>LRRK2</i>         | 221 | Increased levels of TH and cleaved CASPASE3 double positive neurons after treatment with rotenone                                                        | 1 |
| <i>LRRK2</i>         | 222 | Increased levels of TH and cleaved CASPASE3 double positive neurons after treatment with 6-OHDA                                                          | 1 |
| <i>LRRK2</i>         | 223 | Increased nuclear disruption in NSCs (enlarged nuclear area, decrease in circularity, and loss of lamin B1 and B2 on specific folds of nuclear envelope) | 1 |
| <i>LRRK2</i>         | 224 | Increased proteasomal stress in NSCs                                                                                                                     | 1 |
| <i>APP</i>           | 225 | Increased oxidative stress in neurons after exposure to hydrogen peroxide                                                                                | 1 |
| <i>LRRK2</i>         | 225 | Increased oxidative stress in neurons after exposure to hydrogen peroxide                                                                                | 1 |
| <i>LRRK2</i>         | 226 | Increased apoptosis in NSCs after exposure to MG132                                                                                                      | 1 |
| <i>LRRK2</i>         | 227 | Increased amount of centromeric signals accompanied by reorganization of centromeric heterochromatin in NSCs                                             | 1 |
| <i>SNCA</i>          | 228 | Increase in basal levels of NO (RNS) in neurons                                                                                                          | 1 |
| <i>LRRK2</i>         | 229 | Increased phosphorylation of lamin B1 and B2 in NSCs                                                                                                     | 1 |
| <i>SNCA</i>          | 230 | Increased accumulation of NO in neurons after exposure to mitochondrial toxins (Paraquat or Maneb)                                                       | 1 |
| <i>SNCA</i>          | 231 | Increased ROS levels in basal conditions in neurons                                                                                                      | 1 |
| <i>APP</i>           | 231 | Increased ROS levels in basal conditions in neurons                                                                                                      | 1 |
| <i>Sporadic (AD)</i> | 231 | Increased ROS levels in basal conditions in neurons                                                                                                      | 1 |
| <i>PANK2</i>         | 231 | Increased ROS levels in basal conditions in neurons                                                                                                      | 2 |
| <i>SNCA</i>          | 232 | Increased damage to neurons by inhibition of SOH-MEF2C (Sulfenated-myocyte enhancer factor 2C) after exposure to hydrogen peroxide                       | 1 |
| <i>SNCA</i>          | 233 | Increased damage to neurons by inhibition of SOH-MEF2C (Sulfenated-myocyte enhancer factor 2C) after exposure to Paraquat                                | 1 |
| <i>SNCA</i>          | 234 | Increased damage to neurons by inhibition of SOH-MEF2C (Sulfenated-myocyte enhancer factor 2C) after exposure to Manganese ethylnbisdithiocarbamate      | 1 |
| <i>SNCA</i>          | 235 | Increased amount of caspase-3 positive TH neurons after exposure to hydrogen peroxide                                                                    | 1 |
| <i>SNCA</i>          | 236 | Increase in levels of nitrative stress in neurons                                                                                                        | 1 |
| <i>SNCA</i>          | 237 | Increased ratio of post ER-to-ER forms in neurons after treatment with NAB2                                                                              | 1 |

|               |     |                                                                                                               |   |
|---------------|-----|---------------------------------------------------------------------------------------------------------------|---|
| <i>SNCA</i>   | 238 | Increased levels of secreted $\alpha$ -synuclein by neurons that can be reuptaken by neighboring neurons      | 1 |
| <i>Parkin</i> | 239 | Increased spontaneous dopamine release by neurons                                                             | 1 |
| <i>Parkin</i> | 240 | Increased MAO A and B transcription in neurons                                                                | 1 |
| <i>Parkin</i> | 241 | Increased dopamine-induced oxidative stress in neurons                                                        | 1 |
| <i>Parkin</i> | 242 | Increased amount of protein carbonyls in neurons                                                              | 1 |
| <i>Parkin</i> | 243 | Increased MAO-A and MAO-B enzymatic activities in neurons                                                     | 1 |
| <i>Parkin</i> | 244 | Increased electron density in matrix of the inner mitochondrial membrane of neurons                           | 1 |
| <i>Parkin</i> | 245 | Increased perikaryal volume in mitochondria of neurons                                                        | 1 |
| <i>Parkin</i> | 246 | Increased swelling of mitochondrial cristae in the inner mitochondrial membrane of neurons                    | 1 |
| <i>Parkin</i> | 247 | Increased activation of Nrf2 pathway in neurons                                                               | 1 |
| <i>Parkin</i> | 248 | Increased 2',7'- dichlorodihydrofluorescein (DCF) fluorescence in neurons                                     | 1 |
| <i>PINK1</i>  | 249 | Increase in passive leak of protons from inner mitochondrial membrane of neurons                              | 1 |
| <i>PINK1</i>  | 250 | Increased Basal Oxygen Consumption Rate (OCR) in neurons                                                      | 1 |
| <i>PINK1</i>  | 251 | Increase in PGC-1 $\alpha$ levels in neurons                                                                  | 1 |
| <i>PINK1</i>  | 252 | Increased generation of mROS after exposure to low concentrations of valinomycin in neurons                   | 1 |
| <i>SMN1</i>   | 253 | Increased amount of nuclear gems (SMN protein nuclear foci) in neurons after treatment with valproic acid     | 1 |
| <i>SMN1</i>   | 254 | Increased amount of nuclear gems (SMN protein nuclear foci) in neurons after treatment of tobramycin          | 1 |
| <i>SMN1</i>   | 255 | Increased SMN protein levels in neurons after treatment of valproic acid                                      | 1 |
| <i>SMN1</i>   | 256 | Increased SMN protein levels in neurons after treatment of tobramycin                                         | 1 |
| <i>SMN1</i>   | 257 | Increased percentage of apoptotic neurons                                                                     | 1 |
| <i>SMN1</i>   | 258 | Increase activation of initiator procaspase-8 to its cleaved form in neurons                                  | 1 |
| <i>SMN1</i>   | 259 | Increased amount of cleaved caspase-8 positive neurons                                                        | 1 |
| <i>SMN1</i>   | 260 | Increased amount of membrane bound Fas-ligand in neurons                                                      | 1 |
| <i>SMN1</i>   | 261 | Increased amounts of nuclear gems (SMN protein nuclear foci) in astrocytes after treatment with valproic acid | 1 |
| <i>SMN1</i>   | 262 | Increased amounts of nuclear gems (SMN protein nuclear foci) in astrocytes after treatment with tobramycin    | 1 |
| <i>SMN1</i>   | 263 | Increased SMN protein levels in astrocytes after treatment with valproic acid                                 | 1 |
| <i>SMN1</i>   | 264 | Increased SMN protein levels in astrocytes after treatment with tobramycin                                    | 1 |
| <i>MeCP2</i>  | 265 | Increase in glutamatergic synapse amount in neurons after                                                     | 1 |

|                |     |                                                                                                               |   |
|----------------|-----|---------------------------------------------------------------------------------------------------------------|---|
|                |     | treatment of IGF1                                                                                             |   |
| <i>MeCP2</i>   | 266 | Increased glutamatergic synapse amount and MeCP2 protein levels in neurons after treatment with gentamicin    | 1 |
| <i>CDKL5</i>   | 267 | Increased amount of aberrant dendritic spines in neurons                                                      | 1 |
| <i>PGRN</i>    | 268 | Increased percentage of neurons with cytoplasmic TDP-43 after exposure to tunicamycin                         | 1 |
| <i>PGRN</i>    | 269 | Increased percentage of neurons with cytoplasmic TDP-43 after exposure to staurosporine                       | 1 |
| <i>PGRN</i>    | 270 | Increased caspase-3 activity in neurons after exposure to staurosporine                                       | 1 |
| <i>PGRN</i>    | 271 | Increased caspase-3 activity in neurons after exposure to tunicamycin                                         | 1 |
| <i>PGRN</i>    | 272 | Increased levels of S6K2 in neurons after ectopic progranulin expression                                      | 1 |
| <i>TDP-43</i>  | 273 | Increased levels of soluble and detergent-resistant TDP-43 protein in neurons                                 | 1 |
| <i>TDP-43</i>  | 274 | Increase in detergent-insoluble TDP-43 in neurons                                                             | 1 |
| <i>TDP-43</i>  | 275 | Increased amount of SNRPB2 bound to TDP-43 in neurons                                                         | 1 |
| <i>TDP-43</i>  | 276 | Increased neurite length in neurons after exposure to anacardic acid                                          | 1 |
| <i>TDP-43</i>  | 277 | Increased risk of death in astrocytes under basal conditions                                                  | 1 |
| <i>SOD1</i>    | 278 | Increase in SOD1 aggregates in cytoplasm, nuclei and neurites of motor neurons                                | 1 |
| <i>SOD1</i>    | 279 | Increased neurite degeneration in motor neurons                                                               | 1 |
| <i>CACNA1C</i> | 280 | Increased secretion of dopamine in neurons                                                                    | 1 |
| <i>CACNA1C</i> | 281 | Increased secretion of norepinephrine in neurons                                                              | 1 |
| <i>CACNA1C</i> | 282 | Increase in sustained calcium ion rise following depolarization of neurons                                    | 1 |
| <i>CACNA1C</i> | 283 | Increase in fraction of neurons expressing TH                                                                 | 1 |
| <i>CACNA1C</i> | 284 | Increased proportion of neurons expressing upper layer markers (CUX1 and REELIN)                              | 1 |
| <i>HTT</i>     | 285 | Increased death of neurons with large CAG expansions                                                          | 1 |
| <i>HTT</i>     | 286 | Increased risk of neuronal death with BDNF withdrawal                                                         | 2 |
| <i>HTT</i>     | 287 | Increased calcium dyshomeostasis in neurons after exposure to pathological glutamate levels                   | 1 |
| <i>HTT</i>     | 288 | Increased neuronal death after exposure to 30 minute glutamate pulses                                         | 1 |
| <i>HTT</i>     | 289 | Increased mitochondrial fragmentation along neurites of GABA neurons                                          | 1 |
| <i>HTT</i>     | 290 | Increased mROS formation in medium spiny neurons                                                              | 1 |
| <i>HTT</i>     | 291 | Increased neurite length after treatment with dynamin-related protein 1 peptide inhibitor P110-TAT in neurons | 1 |
| <i>HTT</i>     | 292 | Increased levels of ATP in medium spiny neurons after treatment                                               | 1 |



|                |     |                                                                                                                                              |   |
|----------------|-----|----------------------------------------------------------------------------------------------------------------------------------------------|---|
|                |     | with dynamin-related protein 1 peptide inhibitor P110-TAT                                                                                    |   |
| <i>HTT</i>     | 293 | Increased mitochondrial membrane potential after treatment with dynamin-related protein 1 peptide inhibitor P110-TAT in medium spiny neurons | 1 |
| <i>HTT</i>     | 294 | Increase in caspase-3/7 activity in NSCs upon growth factor deprivation                                                                      | 1 |
| <i>HTT</i>     | 295 | Increase in TUNEL-positive NSCs                                                                                                              | 1 |
| <i>HTT</i>     | 296 | Increased electron clear vacuoles under basal conditions in cytoplasm of astrocytes                                                          | 1 |
| <i>HTT</i>     | 297 | Increased apoptotic cell death in iPSCs through activation of the p53-mediated apoptotic pathway                                             | 1 |
| <i>HTT</i>     | 298 | Increased amount of peroxiredoxin1, peroxiredoxin2 and peroxiredoxin6 in iPSCs                                                               | 1 |
| <i>HTT</i>     | 299 | Increased amount of TUNEL-positive iPSCs                                                                                                     | 1 |
| <i>HTT</i>     | 300 | Increased expression of BTF3 and ATM in iPSCs                                                                                                | 1 |
| <i>ALDP</i>    | 301 | Increased very long chain fatty acid levels in oligodendrocytes compared to AMN ABCD1 (X-linked Adrenoleukodystrophy) mutations              | 1 |
| <i>ABCD1</i>   | 301 | Increased very long chain fatty acid levels in oligodendrocytes compared to AMN ABCD1 (X-linked Adrenoleukodystrophy) mutations              | 1 |
| <i>SCN1A</i>   | 302 | Increased sodium current in neurons                                                                                                          | 1 |
| <i>SCN1A</i>   | 303 | Increased mean sodium current densities in neurons                                                                                           | 1 |
| <i>SCN1A</i>   | 304 | Increased repetitive firing potential in neurons                                                                                             | 1 |
| <i>SCN1A</i>   | 305 | Increased excitability in neurons                                                                                                            | 1 |
| <i>C9ORF72</i> | 305 | Increased excitability in neurons                                                                                                            | 1 |
| <i>TDP-43</i>  | 305 | Increased excitability in neurons                                                                                                            | 1 |
| <i>SMN1</i>    | 305 | Increased excitability in neurons                                                                                                            | 1 |
| <i>SCN1A</i>   | 306 | Increased amount of depolarized resting membrane potentials (bipolar shaped neurons)                                                         | 1 |
| <i>FXN</i>     | 307 | Increased expression of MSH2 enzyme in iPSCs                                                                                                 | 1 |
| <i>FXN</i>     | 308 | Increased GAA-TTC repeat instability in iPSCs                                                                                                | 1 |
| <i>FXN</i>     | 309 | Increased instability of GAA repeats in iPSCs                                                                                                | 1 |
| <i>MAPT</i>    | 310 | Increased amount of caspase-cleaved TAU fragmentation in neurons                                                                             | 1 |
| <i>MAPT</i>    | 311 | Increased neurite fragmentation/ degeneration in glutamatergic neurons                                                                       | 1 |
| <i>MAPT</i>    | 312 | Increased neurite fragmentation/ degeneration in GABAergic neurons                                                                           | 1 |
| <i>PLP1</i>    | 313 | Increased amount of apoptotic cells in oligodendrocytes                                                                                      | 1 |
| <i>ATP7A</i>   | 314 | Increased distribution of ATP7A molecules throughout cytoplasm in iPSCs                                                                      | 1 |
| <i>ATP7A</i>   | 315 | Increased opacity/density embryoid body structures in iPSCs                                                                                  | 1 |

|                      |     |                                                                                                                 |   |
|----------------------|-----|-----------------------------------------------------------------------------------------------------------------|---|
| <i>CACNA1C</i>       | 316 | Increased proportion of CTIP2 expressing neurons in lower layer marker (FOXP1 and ETV1) expressing neurons      | 1 |
| <i>GAA</i>           | 317 | Increased positive staining for Periodic acid-Schiff in iPSCs                                                   | 1 |
| <i>ERCC6</i>         | 318 | Increased iPSC death in absence of CSB                                                                          | 1 |
| <i>ERCC6</i>         | 319 | Increased levels of ROS in iPSCs                                                                                | 1 |
| <i>LRRK2</i>         | 320 | Increased levels of mitochondrial DNA damage in NSCs                                                            | 1 |
| <i>LRRK2</i>         | 321 | Increase in mobility of mitochondria in the proximal axon of neurons                                            | 1 |
| <i>APP</i>           | 322 | Increased levels of cleaved caspase-4 in astrocytes                                                             | 1 |
| <i>APP</i>           | 323 | Increased binding protein (BiP) levels in astrocytes                                                            | 1 |
| <i>Sporadic (AD)</i> | 323 | Increased binding protein (BiP) levels in astrocytes                                                            | 1 |
| <i>APP</i>           | 324 | Increased ROS levels in basal conditions in astrocytes                                                          | 1 |
| <i>Sporadic (AD)</i> | 324 | Increased ROS levels in basal conditions in astrocytes                                                          | 1 |
| <i>APP</i>           | 325 | Increased ER stress in astrocytes                                                                               | 1 |
| <i>Sporadic (AD)</i> | 325 | Increased ER stress in astrocytes                                                                               | 1 |
| <i>APP</i>           | 326 | Increased oxidative stress in astrocytes                                                                        | 1 |
| <i>Sporadic (AD)</i> | 326 | Increased oxidative stress in astrocytes                                                                        | 1 |
| <i>HTT</i>           | 327 | Increase in caspase-3/7 activity in neurons upon BDNF withdrawal                                                | 1 |
| <i>NPC1</i>          | 328 | Increased cholesterol accumulation in LE/L compartment in neurons                                               | 1 |
| <i>PLP1</i>          | 329 | Increased nuclear condensation in apoptotic oligodendrocytes                                                    | 1 |
| <i>PSEN1</i>         | 330 | Increased amount of A $\beta$ 42 in neurons                                                                     | 1 |
| <i>PSEN1</i>         | 331 | Increased production of A $\beta$ 39 in neurons after treatment with $\gamma$ -secretase modulator              | 1 |
| <i>PSEN1</i>         | 332 | Increased production of A $\beta$ 37 in neurons after treatment with $\gamma$ -secretase modulator              | 1 |
| <i>Parkin</i>        | 333 | Increase in free tubulin in neurons                                                                             | 1 |
| <i>Parkin</i>        | 334 | Increased neurite length after treatment with taxol in neurons                                                  | 1 |
| <i>Parkin</i>        | 335 | Increased number of terminals after treatment with taxol in neurons                                             | 1 |
| <i>Parkin</i>        | 336 | Increased number of branch points after treatment with taxol in neurons                                         | 1 |
| <i>Parkin</i>        | 337 | Increased neurite complexity after treatment with taxol in neurons                                              | 1 |
| <i>NPC1</i>          | 338 | Increase in early cell death in neurons                                                                         | 1 |
| <i>NPC1</i>          | 339 | Increased cell survival in neurons after treatment with curcumin                                                | 1 |
| <i>NPC1</i>          | 340 | Increased cell survival in neurons after treatment with dantrolene                                              | 1 |
| <i>MAPT</i>          | 341 | Increased fragmentation of TAU protein in neurons                                                               | 1 |
| <i>SMN1</i>          | 342 | Increased membrane resistance in motor neurons                                                                  | 1 |
| <i>SMN1</i>          | 343 | Increased Na <sup>+</sup> current in motor neurons                                                              | 1 |
| <i>PSEN1</i>         | 344 | Increased A $\beta$ 42/40 ratio in NSCs                                                                         | 1 |
| <i>SHANK3</i>        | 345 | Increased amplitude of spontaneous excitatory post-synaptic currents after treatment with IGF1 in neurons       | 1 |
| <i>SHANK3</i>        | 346 | Increased frequency of spontaneous excitatory post-synaptic currents after treatment with IGF1 in neurons       | 1 |
| <i>SHANK3</i>        | 347 | Increased current size generation in response to focal application of NMDA after treatment with IGF1 in neurons | 1 |

|                 |     |                                                                                                                  |   |
|-----------------|-----|------------------------------------------------------------------------------------------------------------------|---|
| <i>SHANK3</i>   | 348 | Increased rate of decay of NMDA-excitatory post-synaptic currents in neurons                                     | 1 |
| <i>SHANK3</i>   | 349 | Increased input resistance in neurons                                                                            | 1 |
| <i>NPC1</i>     | 350 | Increased cell viability in neurons after treatment with carbamazepine with or without HP- $\beta$ -cyclodextrin | 1 |
| <i>NPC1</i>     | 351 | Increased cell viability in neurons after treatment with rapamycin with or without HP- $\beta$ -cyclodextrin     | 1 |
| <i>NPC1</i>     | 352 | Increased cell viability in neurons after treatment with trehalose with or without HP- $\beta$ -cyclodextrin     | 1 |
| <i>MAPT</i>     | 353 | Increased immunoreactivity for AT8 in neurons                                                                    | 1 |
| <i>NPC1</i>     | 354 | Increased cell viability in neurons after treatment with verapamil with or without HP- $\beta$ -cyclodextrin     | 1 |
| <i>CACNA1C</i>  | 355 | Increase in sustained calcium ion rise following depolarization of NSCs                                          | 1 |
| <i>UNC-93-B</i> | 356 | Increased replication speed of HSV-1-GFP in oligodendrocytes                                                     | 1 |
| <i>UNC-93-B</i> | 357 | Increased replication speed of HSV-1-GFP in neurons                                                              | 1 |
| <i>TLR3</i>     | 357 | Increased replication speed of HSV-1-GFP in neurons                                                              | 1 |
| <i>APP</i>      | 358 | Increased levels of binding protein (BiP) in neurons after treatment with high concentrations of DHA             | 1 |
| <i>HTT</i>      | 359 | Increased levels of mitochondrial associated dynamin-related protein 1 in iPSCs                                  | 1 |
| <i>HTT</i>      | 360 | Increased levels of mitochondrial associated p53 in iPSCs                                                        | 1 |
| <i>FUS</i>      | 361 | Increased punctuate cytoplasmic delocalization of FUS protein in iPSCs                                           | 1 |
| <i>TDP-43</i>   | 362 | Increased amount of TDP-43 insoluble fractions in neurons after exposure to arsenite                             | 1 |
| <i>SOD1</i>     | 363 | Increase in TUNEL-positive motor neurons                                                                         | 1 |
| <i>SOD1</i>     | 364 | Increased levels of soluble SOD1 in motor neurons after treatment with MG132                                     | 1 |
| <i>SOD1</i>     | 365 | Increase in mitochondrial density in processes in motor neurons                                                  | 1 |
| <i>SOD1</i>     | 366 | Increased motor neuron survival after treatment with salubrial                                                   | 1 |
| <i>GBA1</i>     | 367 | Increase in $\alpha$ -synuclein immunoreactivity in midbrain dopaminergic neurons                                | 1 |
| <i>DISC1</i>    | 368 | Increased soma size in neurons at one and two weeks post-differentiation                                         | 1 |
| <i>HTT</i>      | 369 | Increased neurite-like processes length in neurons                                                               | 3 |
| <i>HTT</i>      | 370 | Increased nuclear:cytoplasmic ratio of endogenous MAP2 in neurons                                                | 2 |
| <i>C9ORF72</i>  | 371 | Increased LIMK-1/2 phosphorylation in motor neurons                                                              | 1 |
| <i>C9ORF72</i>  | 372 | Increased levels of Rac1 in motor neurons                                                                        | 1 |
| <i>C9ORF72</i>  | 373 | Increased cofilin phosphorylation in motor neurons                                                               | 1 |
| <i>DHCR7</i>    | 374 | Increased 7-, 8- DHC levels in iPSCs after exposure to cholesterol-deficient mTesR1 medium                       | 4 |

|                  |     |                                                                                                                                   |   |
|------------------|-----|-----------------------------------------------------------------------------------------------------------------------------------|---|
| <i>DHCR7</i>     | 375 | Increased rates of neuronal differentiation in iPSCs                                                                              | 2 |
| <i>DHCR7</i>     | 376 | Increased gap and tight junctions in iPSCs cultured in cholesterol-deficient mTesR1 medium after treatment with LDL               | 2 |
| <i>DHCR7</i>     | 377 | Increased formation of rosette structures in iPSCs iPSCs cultured in cholesterol-deficient mTesR1 medium after treatment with LDL | 2 |
| <i>hnRNPA2B1</i> | 378 | Increased levels of nuclear, insoluble of hnRNP A2/B1 in motor neurons                                                            | 1 |
| <i>VCP</i>       | 378 | Increased levels of nuclear, insoluble of hnRNP A2/B1 in motor neurons                                                            | 1 |
| <i>PANK2</i>     | 379 | Increased proportion of altered mitochondria in neurons                                                                           | 1 |
| <i>PANK2</i>     | 380 | Increased TfR1 levels in neurons                                                                                                  | 1 |
| <i>PANK2</i>     | 381 | Increased mature firing rate of neurons after treatment with CoA                                                                  | 1 |
| <i>MAPT</i>      | 382 | Increased levels of insoluble P-tau protein in neurons                                                                            | 1 |
| <i>MAPT</i>      | 383 | Increased levels of insoluble tau in neurons                                                                                      | 1 |
| <i>MAPT</i>      | 384 | Increased levels of polyubiquitinated proteins in neurons                                                                         | 1 |
| <i>MAPT</i>      | 385 | Increased levels of autophagy markers in neurons                                                                                  | 1 |
| <i>MAPT</i>      | 386 | Increased levels of CHOP protein in neurons                                                                                       | 1 |
| <i>MAPT</i>      | 387 | Increased cell viability of neurons after treatment with rapamycin                                                                | 1 |
| <i>MAPT</i>      | 388 | Increased cell viability of neurons exposed to rotenone after treatment with rapamycin                                            | 1 |
| <i>MAPT</i>      | 389 | Increased cell viability of neurons exposed to NMDA after treatment with rapamycin                                                | 1 |
| <i>MAPT</i>      | 390 | Increased cell viability of neurons exposed to A $\beta$ (1-42) after treatment with rapamycin                                    | 1 |
| <i>GBA1</i>      | 391 | Increased protein levels of Glucocerebrosidase (Gcase) in dopaminergic neurons after treatment with NCGC607                       | 2 |
| <i>GBA1</i>      | 392 | Increased activity levels of Glucocerebrosidase (Gcase) in dopaminergic neurons after treatment with NCGC607                      | 2 |
| <i>GBA1</i>      | 393 | Increased translocation of Glucocerebrosidase (Gcase) to the lysosome in dopaminergic neurons after treatment with NCGC607        | 2 |
| <i>GBA1</i>      | 394 | Increased levels of lysosomal GlcSph in dopaminergic neurons                                                                      | 2 |
| <i>VPS13A</i>    | 395 | Increased neurite outgrowth in GABAergic medium spiny neurons                                                                     | 2 |
| <i>VPS13A</i>    | 396 | Increased neurite ramification in GABAergic medium spiny neurons                                                                  | 2 |
| <i>VPS13A</i>    | 397 | Increased Na <sup>+</sup> current amplitudes in medium spiny neurons                                                              | 2 |
| <i>VPS13A</i>    | 398 | Increased amplitude of provoked action potentials in medium spiny neurons                                                         | 2 |
| <i>VPS13A</i>    | 399 | Increased amplitude of spontaneous action potentials in medium spiny neurons                                                      | 2 |
| <i>VPS13A</i>    | 400 | Increased amplitude of miniature postsynaptic currents in medium spiny neurons                                                    | 2 |
| <i>VPS13A</i>    | 401 | Increased percentage of medium spiny neurons showing miniature postsynaptic currents                                              | 2 |
| <i>VPS13A</i>    | 402 | Increased G/F-actin ration in medium spiny neurons                                                                                | 2 |

|                      |     |                                                                                                                     |   |
|----------------------|-----|---------------------------------------------------------------------------------------------------------------------|---|
| <i>VPS13A</i>        | 403 | Increased phosphorylation of cofflin in medium spiny neurons                                                        | 2 |
| <i>NPC1</i>          | 404 | Increased co-localization of cholesterol/ GM2 in neurons                                                            | 2 |
| <i>NPC1</i>          | 405 | Increased accumulation of osmiophilic material in neurons                                                           | 2 |
| <i>NPC1</i>          | 406 | Increased levels of GM2 in neurons                                                                                  | 2 |
| <i>NPC1</i>          | 407 | Increased levels of Hex A mRNA in neurons                                                                           | 1 |
| <i>NPC1</i>          | 408 | Increased protein levels of Hex A in neurons                                                                        | 2 |
| <i>MAPT</i>          | 409 | Increased levels of exon-10 containing 4R-TAU isoforms in astrocytes                                                | 1 |
| <i>MAPT</i>          | 410 | Increased levels of exon-10 containing 4R-TAU isoforms in neurons                                                   | 1 |
| <i>MAPT</i>          | 411 | Increased astrocyte size                                                                                            | 1 |
| <i>MAPT</i>          | 412 | Increased levels of ubiquitinated proteins in astrocytes                                                            | 1 |
| <i>MAPT</i>          | 413 | Increased cell death in astrocytes after exposure to rotenone                                                       | 1 |
| <i>MAPT</i>          | 414 | Increased release of lactate dehydrogenase in astrocytes after exposure to rotenone                                 | 1 |
| <i>MAPT</i>          | 415 | Increased protein levels of ANXA2 in astrocytes                                                                     | 1 |
| <i>DISC1</i>         | 416 | Increased total dendritic length in neurons at one and two weeks post-differentiation                               | 1 |
| <i>PSEN1</i>         | 417 | Decreased amount of extracellular A $\beta$ 42 by neurons by treatment with a selective A $\beta$ 42-lowering agent | 1 |
| <i>PSEN2</i>         | 417 | Decreased amount of extracellular A $\beta$ 42 by neurons by treatment with a selective A $\beta$ 42-lowering agent | 1 |
| <i>PSEN1</i>         | 418 | Decreased amount of extracellular A $\beta$ 42 by neurons after treatment with $\gamma$ -secretase inhibitor        | 1 |
| <i>PSEN2</i>         | 418 | Decreased amount of extracellular A $\beta$ 42 by neurons after treatment with $\gamma$ -secretase inhibitor        | 1 |
| <i>LRRK2</i>         | 419 | Decreased amount of dopaminergic neurons after exposure to valinomycin                                              | 1 |
| <i>PINK1</i>         | 419 | Decreased amount of dopaminergic neurons after exposure to valinomycin                                              | 1 |
| <i>LRRK2</i>         | 420 | Decreased amount of dopaminergic neurons after exposure to concanamycin A                                           | 1 |
| <i>PINK1</i>         | 420 | Decreased amount of dopaminergic neurons after exposure to concanamycin A                                           | 1 |
| <i>APP</i>           | 421 | Decreased ROS in neurons after treatment with $\beta$ -secretase inhibitor                                          | 1 |
| <i>Sporadic (AD)</i> | 421 | Decreased ROS in neurons after treatment with $\beta$ -secretase inhibitor                                          | 1 |
| <i>Parkin</i>        | 422 | Decreased binding of CFT in neurons                                                                                 | 1 |
| <i>TDP-43</i>        | 423 | Decrease in size of neurites                                                                                        | 3 |
| <i>Parkin</i>        | 423 | Decrease in size of neurites                                                                                        | 1 |
| <i>MAPT</i>          | 423 | Decrease in size of neurites                                                                                        | 3 |
| <i>LRRK2</i>         | 424 | Decreased amount of TUJ1+ NSCs                                                                                      | 1 |
| <i>MeCP2</i>         | 424 | Decreased amount of TUJ1+ NSCs                                                                                      | 1 |

|                      |     |                                                                                                                                                |   |
|----------------------|-----|------------------------------------------------------------------------------------------------------------------------------------------------|---|
| <i>ABCD1</i>         | 425 | Decreased C26:0/C22:0 ratio levels in oligodendrocytes by lovastatin (through induced upregulation of ABCD2 gene)                              | 1 |
| <i>ALDP</i>          | 425 | Decreased C26:0/C22:0 ratio levels in oligodendrocytes by lovastatin (through induced upregulation of ABCD2 gene)                              | 1 |
| <i>ABCD1</i>         | 426 | Decreased C26:0/C22:0 ratio levels in oligodendrocytes after treatment with 4-PBA (through induced upregulation of ABCD2 gene)                 | 1 |
| <i>ALDP</i>          | 426 | Decreased C26:0/C22:0 ratio levels in oligodendrocytes after treatment with 4-PBA (through induced upregulation of ABCD2 gene)                 | 1 |
| <i>APP</i>           | 427 | Decreased amount of A $\beta$ -oligomers in neurons with $\beta$ -secretase inhibitor treatment                                                | 1 |
| <i>Sporadic (AD)</i> | 427 | Decreased amount of A $\beta$ -oligomers in neurons with $\beta$ -secretase inhibitor treatment                                                | 1 |
| <i>APP</i>           | 428 | Decreased amount of oxidative stress in neurons after treatment with $\beta$ -secretase inhibitor                                              | 1 |
| <i>APP</i>           | 429 | Decreased ratio of secreted APPs- $\alpha$ to APPs- $\beta$                                                                                    | 1 |
| <i>APP</i>           | 430 | Decreased tau protein levels in neurons after treatment with 3D6 antibody                                                                      | 1 |
| <i>APP</i>           | 431 | Decreased Tau protein levels in neurons after treatment with AW7 antibody                                                                      | 1 |
| <i>APP</i>           | 432 | Decreased p-tau/total tau ratio in neurons after treatment with $\beta$ -secretase inhibitors                                                  | 1 |
| <i>APP</i>           | 433 | Decreased anti-glycogen synthase kinase 3 beta ( $\alpha$ GSK-3 $\beta$ ) levels in neurons after treatment with $\beta$ -secretase inhibitors | 1 |
| <i>PSEN1</i>         | 434 | Decreased secretion levels of A $\beta$ 40 and 42 in neurons after treatment with Dual Antiplatelet Therapy (DAPT)                             | 1 |
| <i>PSEN1</i>         | 435 | Decreased production of endogenous A $\beta$ 40 in neurons                                                                                     | 1 |
| <i>LRRK2</i>         | 436 | Decreased amount of basal autophagy in neurons                                                                                                 | 1 |
| <i>GBA1</i>          | 437 | Decreased amount of autophagic flux in neurons                                                                                                 | 1 |
| <i>GBA1</i>          | 438 | Decreased activity of GBA2 in neurons                                                                                                          | 1 |
| <i>GBA1</i>          | 439 | Decreased activity of $\beta$ -galactosidase in neurons                                                                                        | 1 |
| <i>LRRK2</i>         | 440 | Decreased average neurite length of DA neurons after exposure to rapamycin                                                                     | 1 |
| <i>LRRK2</i>         | 441 | Decreased average neurite length of DA neurons after exposure to leupeptin                                                                     | 1 |
| <i>LRRK2</i>         | 442 | Decrease in mitochondrion length in the proximal axon of neurons                                                                               | 1 |
| <i>LRRK2</i>         | 443 | Decreased levels of co-localized LC3/LAMP-1 in neurons                                                                                         | 1 |
| <i>LRRK2</i>         | 444 | Decreased pERK levels in neurons after treatment with LRRK2-IN1                                                                                | 1 |
| <i>LRRK2</i>         | 445 | Decreased neuronal oxidative-stress induced cytotoxicity with MEK kinase inhibitor treatment                                                   | 1 |
| <i>LRRK2</i>         | 446 | Decreased degeneration of neurons after treatment with MEK kinase inhibitor                                                                    | 1 |

|               |     |                                                                                                                        |   |
|---------------|-----|------------------------------------------------------------------------------------------------------------------------|---|
| <i>LRRK2</i>  | 447 | Decreased clonal expansion in NSCs                                                                                     | 1 |
| <i>LRRK2</i>  | 448 | Decreased phosphorylation of LRRK2 downstream targets in NSCs after treatment with LRRK2-In-1                          | 1 |
| <i>SNCA</i>   | 449 | Decreased protein expression levels of NURR1 and TH in neurons                                                         | 1 |
| <i>SNCA</i>   | 450 | Decreased accumulation of ER-associated degradation substrates (Gcase, Nicastrin) in neurons after treatment with NAB2 | 1 |
| <i>SNCA</i>   | 451 | Decreased levels of ER stress in neurons after treatment with NAB2                                                     | 1 |
| <i>SNCA</i>   | 452 | Decreased levels of nitritive stress in neurons after treatment with NAB2                                              | 1 |
| <i>Parkin</i> | 453 | Decreased dopamine reuptake by neurons                                                                                 | 1 |
| <i>Parkin</i> | 454 | Decreased amount of DAT-binding sites on neurons                                                                       | 1 |
| <i>PINK1</i>  | 455 | Decreased recruitment of Parkin to mitochondria in neurons                                                             | 1 |
| <i>PINK1</i>  | 456 | Decreased mROS production in neurons exposed to low concentrations of valinomycin after treatment with rapamycin       | 1 |
| <i>PINK1</i>  | 457 | Decreased amount of outer mitochondrial membrane (OMM) proteins of increased molecular mass in neurons                 | 1 |
| <i>PINK1</i>  | 458 | Decrease production of mROS in neurons in response to valinomycin after treatment with LRRK2 inhibitor GW5074          | 1 |
| <i>PINK1</i>  | 459 | Decreased levels of glutathione in neurons after exposure to valinomycin                                               | 1 |
| <i>PINK1</i>  | 460 | Decreased levels of glutathione in neurons after exposure to concanamycin A                                            | 1 |
| <i>PINK1</i>  | 461 | Decreased levels of glutathione in neurons after exposure to MPP+                                                      | 1 |
| <i>PINK1</i>  | 462 | Decreased levels of glutathione in neurons after exposure to hydrogen peroxide                                         | 1 |
| <i>SMN1</i>   | 463 | Decreased neuromuscular junction size of neurons                                                                       | 1 |
| <i>SMN1</i>   | 464 | Decrease in growth cone size in neurons                                                                                | 1 |
| <i>SMN1</i>   | 465 | Decrease in mean length of axons in neurons                                                                            | 1 |
| <i>SMN1</i>   | 466 | Decrease in SMN protein in neurons                                                                                     | 1 |
| <i>SMN1</i>   | 467 | Decreased capacity to generate motor neurons                                                                           | 1 |
| <i>SMN1</i>   | 468 | Decreased amount of total cell body volume in neurons                                                                  | 1 |
| <i>SMN1</i>   | 469 | Decreased amount of cellular processes from neurons                                                                    | 1 |
| <i>SMN1</i>   | 470 | Decreased amount of SMI-32+ neurons at time of late differentiation in neurons                                         | 1 |
| <i>SMN1</i>   | 471 | Decreased size of motor neurons                                                                                        | 1 |
| <i>SMN1</i>   | 472 | Decreased levels of SMN protein in astrocytes                                                                          | 1 |
| <i>MeCP2</i>  | 473 | Decrease in frequency/ amplitude of spontaneous postsynaptic currents of neurons                                       | 1 |
| <i>MeCP2</i>  | 474 | Decreased amount of neuronal synapses                                                                                  | 1 |
| <i>MeCP2</i>  | 475 | Decreased amount of the density of V-GLUT1 puncta in dendrites of neurons                                              | 1 |
| <i>MeCP2</i>  | 476 | Decreased soma size of glutamatergic neurons                                                                           | 1 |
| <i>MeCP2</i>  | 477 | Decreased spine density in glutamatergic neurons                                                                       | 1 |

|                |     |                                                                                                                                                             |   |
|----------------|-----|-------------------------------------------------------------------------------------------------------------------------------------------------------------|---|
| <i>MeCP2</i>   | 478 | Decreased formation of TuJ+ iPSCs                                                                                                                           | 1 |
| <i>CDKL5</i>   | 479 | Decreased amount of synaptic contacts in neurons                                                                                                            | 1 |
| <i>ATXN3</i>   | 480 | Decreased ATXN3 aggregate formation in neurons after treatment with calpeptin (calpain inhibitor)                                                           | 1 |
| <i>ATXN3</i>   | 481 | Decreased ATXN3 aggregate formation in neurons after treatment with ALLN (calpain inhibitor)                                                                | 1 |
| <i>PGRN</i>    | 482 | Decreased S6K2 protein levels in neurons                                                                                                                    | 1 |
| <i>PGRN</i>    | 483 | Decreased levels of intracellular progranulin in neurons                                                                                                    | 1 |
| <i>SNCA</i>    | 484 | Decreased levels of SNCG expression in neurons                                                                                                              | 1 |
| <i>PGRN</i>    | 485 | Decreased caspase-3 activity in neurons after ectopic progranulin expression                                                                                | 1 |
| <i>C9ORF72</i> | 486 | Decreased electrical excitability of neurons                                                                                                                | 1 |
| <i>C9ORF72</i> | 487 | Decreased spike size upon depolarization of neurons                                                                                                         | 1 |
| <i>C9ORF72</i> | 488 | Decreased formation of RNA foci in neurons after treatment with antisense oligonucleotides                                                                  | 1 |
| <i>C9ORF72</i> | 489 | Decreased expression of C9ORF72 in neurons                                                                                                                  | 1 |
| <i>TDP-43</i>  | 490 | Decreased survival of neurons                                                                                                                               | 1 |
| <i>TDP-43</i>  | 491 | Decreased amount of TDP-43 insoluble fractions in neurons after exposure to anacardic acid                                                                  | 1 |
| <i>SOD1</i>    | 492 | Decreased neurofilament aggregation in motor neurons by induction of exogenous NF-L after treatment with Dox (doxycycline)                                  | 1 |
| <i>SOD1</i>    | 493 | Decreased neurite degeneration in motor neurons by induction of exogenous NF-L after treatment with Dox (doxycycline)                                       | 1 |
| <i>CACNA1C</i> | 494 | Decreased amount of neurons expressing lower layer markers (FOXP1 and ETV1)                                                                                 | 1 |
| <i>CACNA1C</i> | 495 | Decreased proportion of SATB2 expressing neurons in lower layer marker (FOXP1 and ETV1) expressing neurons                                                  | 1 |
| <i>CACNA1C</i> | 496 | Decreased percent of neurons expressing TH+ after treatment with roscovitine                                                                                | 1 |
| <i>CACNA1C</i> | 497 | Decrease in sustained calcium ion rise following depolarization of neurons after treatment with nimodipine                                                  | 1 |
| <i>HTT</i>     | 498 | Decreased mitochondrial membrane potential in medium spiny neurons                                                                                          | 1 |
| <i>HTT</i>     | 499 | Decreased levels of ATP in medium spiny neurons                                                                                                             | 1 |
| <i>HTT</i>     | 500 | Decreased mitochondrial fragmentation along neurites in GABA neurons after treatment with dynamin-related protein 1 peptide inhibitor P110-TAT              | 1 |
| <i>HTT</i>     | 501 | Decreased mROS formation in medium spiny neurons after treatment with dynamin-related protein 1 peptide inhibitor P110-TAT                                  | 1 |
| <i>HTT</i>     | 502 | Decreased levels of mitochondrial associated dynamin-related protein 1 after treatment with dynamin-related protein 1 peptide inhibitor P110-TAT in neurons | 1 |
| <i>HTT</i>     | 503 | Decreased neuronal death upon BDNF withdrawal after treatment                                                                                               | 1 |



|              |     |                                                                                                                                                  |   |
|--------------|-----|--------------------------------------------------------------------------------------------------------------------------------------------------|---|
|              |     | with dynamin-related protein 1 peptide inhibitor P110-TAT in neurons                                                                             |   |
| <i>HTT</i>   | 504 | Decreased levels of mitochondrial associated p53 after treatment with dynamin-related protein 1 peptide inhibitor P110-TAT in neurons            | 1 |
| <i>HTT</i>   | 505 | Decreased binding of phalloidin-peptide to actin cytoskeleton in NSCs                                                                            | 1 |
| <i>HTT</i>   | 506 | Decreased cell-cell adhesion properties in NSCs                                                                                                  | 1 |
| <i>HTT</i>   | 507 | Decreased intracellular ATP (energy metabolism compromised) in NSCs                                                                              | 1 |
| <i>HTT</i>   | 508 | Decrease in average Oxygen Consumption Rate (OCR) in NSCs after exposure to Carbonyl cyanide-p-trifluoromethoxypheny (FCCP)                      | 1 |
| <i>HTT</i>   | 509 | Decreased ATP/ADP ratios (energy metabolism compromisation) in NSCs                                                                              | 1 |
| <i>HTT</i>   | 510 | Decreased protein levels of N-cadherin in NSCs                                                                                                   | 1 |
| <i>HTT</i>   | 511 | Decreased TGF- $\beta$ 1 mRNA in NSCs                                                                                                            | 1 |
| <i>HTT</i>   | 512 | Decreased expression of cytoskeleton-associated proteins in iPSCs                                                                                | 1 |
| <i>HTT</i>   | 513 | Decreased neuronal differentiation in iPSCs                                                                                                      | 1 |
| <i>HTT</i>   | 514 | Decreased rosette forming efficiency in iPSCs                                                                                                    | 1 |
| <i>HTT</i>   | 515 | Decreased levels of representative antioxidant molecules (Superoxide dismutase1, Glutathione transferase, and Glutathione peroxidase 1) in iPSCs | 1 |
| <i>SCN1A</i> | 516 | Decreased threshold for action potential generation in neurons                                                                                   | 1 |
| <i>SCN1A</i> | 517 | Decrease in action potentials in marked amplitude attenuation in GABAergic neurons                                                               | 1 |
| <i>SCN1A</i> | 518 | Decreased amount of action potential firing in GABAergic neurons                                                                                 | 1 |
| <i>SCN1A</i> | 519 | Decreased output capacity of GABAergic neurons during intense stimulation                                                                        | 1 |
| <i>FXN</i>   | 520 | Decreased excitability of neurons                                                                                                                | 1 |
| <i>FXN</i>   | 521 | Decreased frataxin levels in iPSCs                                                                                                               | 1 |
| <i>FXN</i>   | 522 | Decreased mitochondrial membrane potential in iPSCs                                                                                              | 1 |
| <i>ERCC6</i> | 523 | Decreased growth rate in iPSCs                                                                                                                   | 1 |
| <i>FMR1</i>  | 524 | Decreased neurite outgrowth by forebrain neurons                                                                                                 | 1 |
| <i>FMR1</i>  | 525 | Decrease in length/number of processes extended by forebrain neurons                                                                             | 1 |
| <i>FMR1</i>  | 526 | Decreased motility/slow rate of neurite extension in forebrain neurons                                                                           | 1 |
| <i>ATP7A</i> | 527 | Decreased expression of ATP7A in iPSCs                                                                                                           | 1 |
| <i>ATP7A</i> | 528 | Decreased expression of NESTIN and aberrant rosette lumens during neurosphere development in iPSCs                                               | 1 |
| <i>ATP7A</i> | 529 | Decreased number of N-cad+/ Sox2+ neural rosettes in iPSCs                                                                                       | 1 |
| <i>SOD1</i>  | 530 | Decreased amount of motor neurons                                                                                                                | 1 |

|                      |     |                                                                                                              |   |
|----------------------|-----|--------------------------------------------------------------------------------------------------------------|---|
| <i>SMN1</i>          | 530 | Decreased amount of motor neurons                                                                            | 1 |
| <i>APP</i>           | 531 | Decreased amount of A $\beta$ oligomers in astrocytes after treatment with $\beta$ -secretase inhibitor      | 1 |
| <i>Sporadic (AD)</i> | 531 | Decreased amount of A $\beta$ oligomers in astrocytes after treatment with $\beta$ -secretase inhibitor      | 1 |
| <i>GAA</i>           | 532 | Decreased amount of glycogen granules after treatment with acid- $\alpha$ -glucosidase in iPSCs              | 1 |
| <i>NPC1</i>          | 533 | Decrease in autophagic clearance in neurons (increased p62 and LC3-II levels)                                | 1 |
| <i>GBA1</i>          | 534 | Decrease in proteolysis of long-lived proteins ( $\alpha$ -synuclein, Htt, Tau) in neurons                   | 1 |
| <i>SMN1</i>          | 535 | Decreased motor neuron survival                                                                              | 1 |
| <i>SOD1</i>          | 535 | Decreased motor neuron survival                                                                              | 1 |
| <i>hnRNPA2B1</i>     | 535 | Decreased motor neuron survival                                                                              | 1 |
| <i>SMN1</i>          | 536 | Decreased neuron size                                                                                        | 1 |
| <i>HTT</i>           | 537 | Decreased neurite outgrowth in neurons                                                                       | 1 |
| <i>SMN1</i>          | 537 | Decreased neurite outgrowth in neurons                                                                       | 1 |
| <i>LRRK2</i>         | 537 | Decreased neurite outgrowth in neurons                                                                       | 1 |
| <i>APP</i>           | 538 | Decrease in ROS in astrocytes after treatment with $\beta$ -secretase inhibitor                              | 1 |
| <i>Sporadic (AD)</i> | 538 | Decrease in ROS in astrocytes after treatment with $\beta$ -secretase inhibitor                              | 1 |
| <i>SNCA</i>          | 539 | Decreased ratio of post ER-to-ER forms in neurons                                                            | 1 |
| <i>PLP1</i>          | 540 | Decreased frequency of myelin formation in oligodendrocytes                                                  | 1 |
| <i>PLP1</i>          | 541 | Decreased thickness of myelin sheaths in oligodendrocytes                                                    | 1 |
| <i>LRRK2</i>         | 542 | Decreased Basal Oxygen Consumption Rate (OCR) in neurons                                                     | 2 |
| <i>PANK2</i>         | 542 | Decreased Basal Oxygen Consumption Rate (OCR) in neurons                                                     | 2 |
| <i>PGRN</i>          | 543 | Decreased levels of secreted progranulin in neurons                                                          | 1 |
| <i>GBA1</i>          | 544 | Decreased glucocerebrosidase enzymatic activity in neurons                                                   | 1 |
| <i>CACNA1C</i>       | 545 | Decrease in dendritic length upon depolarization in neurons                                                  | 1 |
| <i>PSEN1</i>         | 546 | Decreased amount of A $\beta$ 42 in neurons after treatment with $\gamma$ -secretase modulator               | 1 |
| <i>PSEN1</i>         | 547 | Decreased amount of A $\beta$ 40 in neurons after treatment with $\gamma$ -secretase modulator               | 1 |
| <i>PSEN1</i>         | 548 | Decreased amount of A $\beta$ 38 in neurons after treatment with $\gamma$ -secretase modulator               | 1 |
| <i>PSEN1</i>         | 549 | Decreased A $\beta$ 42:A $\beta$ 40 ratio in neurons after treatment with $\gamma$ -secretase modulator      | 1 |
| <i>PSEN1</i>         | 550 | Decreased amount of extracellular A $\beta$ 42 by neurons after treatment with $\gamma$ -secretase modulator | 1 |
| <i>PSEN1</i>         | 551 | Decreased amount of extracellular A $\beta$ 40 by neurons after treatment with $\gamma$ -secretase modulator | 1 |
| <i>PSEN1</i>         | 552 | Decreased amount of A $\beta$ 42 in neurons after treatment with $\gamma$ -                                  | 1 |

|                |     |                                                                                                       |   |
|----------------|-----|-------------------------------------------------------------------------------------------------------|---|
|                |     | secretase inhibitor                                                                                   |   |
| <i>PSEN1</i>   | 553 | Decreased amount of A $\beta$ 40 in neurons after treatment with $\gamma$ -secretase inhibitor        | 1 |
| <i>PSEN1</i>   | 554 | Decreased amount of A $\beta$ 38 in neurons after treatment with $\gamma$ -secretase inhibitor        | 1 |
| <i>PSEN1</i>   | 555 | Decreased amount of total A $\beta$ in neurons after treatment with $\gamma$ -secretase inhibitor     | 1 |
| <i>PSEN1</i>   | 556 | Decreased amount of A $\beta$ 42 in iPSCs after treatment with $\gamma$ -secretase modulator          | 1 |
| <i>PSEN1</i>   | 557 | Decreased amount of A $\beta$ 40 in iPSCs after treatment with $\gamma$ -secretase modulator          | 1 |
| <i>PSEN1</i>   | 558 | Decreased amount of A $\beta$ 38 in iPSCs after treatment with $\gamma$ -secretase modulator          | 1 |
| <i>PSEN1</i>   | 559 | Decreased A $\beta$ 42:A $\beta$ 40 ratio in iPSCs after treatment with $\gamma$ -secretase modulator | 1 |
| <i>PSEN1</i>   | 560 | Decreased A $\beta$ 42:A $\beta$ 40 ratio in NSCs after treatment with $\gamma$ -secretase modulator  | 1 |
| <i>PSEN1</i>   | 561 | Decreased amount of A $\beta$ 42 in NSCs after treatment with $\gamma$ -secretase modulator           | 1 |
| <i>APP</i>     | 561 | Decreased amount of A $\beta$ 42 in NSCs after treatment with $\gamma$ -secretase modulator           | 1 |
| <i>PSEN1</i>   | 562 | Decreased amount of A $\beta$ 40 in NSCs after treatment with $\gamma$ -secretase modulator           | 1 |
| <i>APP</i>     | 562 | Decreased amount of A $\beta$ 40 in NSCs after treatment with $\gamma$ -secretase modulator           | 1 |
| <i>PSEN1</i>   | 563 | Decreased amount of A $\beta$ 38 in NSCs after treatment with $\gamma$ -secretase modulator           | 1 |
| <i>APP</i>     | 563 | Decreased amount of A $\beta$ 38 in NSCs after treatment with $\gamma$ -secretase modulator           | 1 |
| <i>Parkin</i>  | 564 | Decreased number of terminals in neurons                                                              | 1 |
| <i>Parkin</i>  | 565 | Decreased number of branch points in neurons                                                          | 1 |
| <i>MAPT</i>    | 566 | Decreased neurite complexity in neurons                                                               | 1 |
| <i>Parkin</i>  | 566 | Decreased neurite complexity in neurons                                                               | 1 |
| <i>Parkin</i>  | 567 | Decreased microtubule stability in neurons                                                            | 1 |
| <i>Parkin</i>  | 568 | Decrease in polymerized tubulin in pellet fractions in neurons                                        | 1 |
| <i>Parkin</i>  | 569 | Decreased neurite length in neurons after treatment with colchicine                                   | 1 |
| <i>Parkin</i>  | 570 | Decreased number of terminals in neurons after treatment with colchicine                              | 1 |
| <i>Parkin</i>  | 571 | Decreased number of branch points in neurons after treatment with colchicine                          | 1 |
| <i>Parkin</i>  | 572 | Decreased neurite complexity in neurons after treatment with colchicine                               | 1 |
| <i>C9ORF72</i> | 573 | Decreased action potential output in motor neurons                                                    | 1 |

|                      |     |                                                                                                        |   |
|----------------------|-----|--------------------------------------------------------------------------------------------------------|---|
| <i>TDP-43</i>        | 573 | Decreased action potential output in motor neurons                                                     | 1 |
| <i>C9ORF72</i>       | 574 | Decreased synaptic input in motor neurons                                                              | 1 |
| <i>TDP-43</i>        | 574 | Decreased synaptic input in motor neurons                                                              | 1 |
| <i>C9ORF72</i>       | 575 | Decrease Na <sup>+</sup> currents in motor neurons                                                     | 1 |
| <i>TDP-43</i>        | 575 | Decrease Na <sup>+</sup> currents in motor neurons                                                     | 1 |
| <i>C9ORF72</i>       | 576 | Decreased K <sup>+</sup> currents in motor neurons                                                     | 1 |
| <i>TDP-43</i>        | 576 | Decreased K <sup>+</sup> currents in motor neurons                                                     | 1 |
| <i>C9ORF72</i>       | 577 | Decreased synaptic activity in motor neurons                                                           | 1 |
| <i>TDP-43</i>        | 577 | Decreased synaptic activity in motor neurons                                                           | 1 |
| <i>SMN1</i>          | 578 | Decrease in Na <sup>+</sup> channel inactivation recovery time in motor neurons                        | 1 |
| <i>MeCP2</i>         | 579 | Decreased nuclear size in neurons                                                                      | 1 |
| <i>SHANK3</i>        | 580 | Decreased production of neurons in iPSCs                                                               | 1 |
| <i>SHANK3</i>        | 581 | Decreased amplitude of spontaneous excitatory post-synaptic currents in neurons                        | 1 |
| <i>SHANK3</i>        | 582 | Decreased frequency of spontaneous excitatory post-synaptic currents in neurons                        | 2 |
| <i>SHANK3</i>        | 583 | Decreased amplitude of spontaneous synaptic events in neurons                                          | 1 |
| <i>SHANK3</i>        | 584 | Decreased frequency of spontaneous synaptic events in neurons                                          | 1 |
| <i>SHANK3</i>        | 585 | Decreased current size generation in response to focal application of AMPA in neurons                  | 1 |
| <i>SHANK3</i>        | 586 | Decreased current size generation in response to focal application of NMDA in neurons                  | 1 |
| <i>SHANK3</i>        | 587 | Decreased amount of excitatory synapses in neurons                                                     | 1 |
| <i>SHANK3</i>        | 588 | Decreased input resistance after treatment with IGF1 in neurons                                        | 1 |
| <i>APP</i>           | 589 | Decreased cell viability in neurons                                                                    | 1 |
| <i>APP</i>           | 590 | Decreased levels of binding protein (BiP) in neurons after treatment with DHA                          | 1 |
| <i>Sporadic (AD)</i> | 590 | Decreased levels of binding protein (BiP) in neurons after treatment with DHA                          | 1 |
| <i>APP</i>           | 591 | Decreased levels of ROS in neurons after treatment with DHA                                            | 1 |
| <i>APP</i>           | 592 | Decreased levels of cleaved caspase-4 in neurons after treatment with DHA                              | 1 |
| <i>APP</i>           | 593 | Decreased levels of binding protein (BiP) in neurons after treatment with $\beta$ -secretase inhibitor | 1 |
| <i>Sporadic (AD)</i> | 593 | Decreased levels of binding protein (BiP) in neurons after treatment with $\beta$ -secretase inhibitor | 1 |
| <i>APP</i>           | 594 | Decreased levels of cleaved caspase-4 in neurons after treatment with $\beta$ -secretase inhibitor     | 1 |
| <i>GBA1</i>          | 595 | Decreased protein levels of Glucocerebrosidase (Gcase) in neurons                                      | 1 |
| <i>GBA1</i>          | 596 | Decreased enzymatic activity of Glucocerebrosidase (Gcase) in neurons                                  | 1 |
| <i>CACNA1C</i>       | 597 | Decrease in sustained calcium ion rise following depolarization of                                     | 1 |

|                      |     |                                                                                                                                                           |   |
|----------------------|-----|-----------------------------------------------------------------------------------------------------------------------------------------------------------|---|
|                      |     | NSCs after treatment with nimodipine                                                                                                                      |   |
| <i>APP</i>           | 598 | Decreased levels of binding protein (BiP) in astrocytes after treatment with $\beta$ -secretase inhibitor                                                 | 1 |
| <i>Sporadic (AD)</i> | 598 | Decreased levels of binding protein (BiP) in astrocytes after treatment with $\beta$ -secretase inhibitor                                                 | 1 |
| <i>APP</i>           | 599 | Decreased levels of cleaved caspase-4 in astrocytes after treatment with $\beta$ -secretase inhibitor                                                     | 1 |
| <i>HTT</i>           | 600 | Decreased levels of mitochondrial associated dynamin-related protein 1 after treatment with dynamin-related protein 1 peptide inhibitor P110-TAT in iPSCs | 1 |
| <i>HTT</i>           | 601 | Decreased levels of mitochondrial associated p53 after treatment with dynamin-related protein 1 peptide inhibitor P110-TAT in iPSCs                       | 1 |
| <i>APP</i>           | 602 | Decreased levels of extracellular A $\beta$ 42 in neurons                                                                                                 | 1 |
| <i>APP</i>           | 603 | Decreased levels of extracellular A $\beta$ 40 in neurons                                                                                                 | 1 |
| <i>SOD1</i>          | 604 | Decreased soma size of motor neurons                                                                                                                      | 1 |
| <i>SOD1</i>          | 605 | Decrease in length/number of processes in motor neurons                                                                                                   | 1 |
| <i>SOD1</i>          | 606 | Decreased levels of SDHA protein in motor neurons                                                                                                         | 1 |
| <i>SOD1</i>          | 607 | Decreased levels of MT-COX1 protein in motor neurons                                                                                                      | 1 |
| <i>SOD1</i>          | 608 | Decreased amount of motile mitochondria in motor neurons                                                                                                  | 1 |
| <i>SOD1</i>          | 609 | Decreased survival of motor neurons when cultured with control glia                                                                                       | 1 |
| <i>FMR1</i>          | 610 | Decrease in length/number of processes in neurons                                                                                                         | 1 |
| <i>DISC1</i>         | 611 | Decreased frequency of excitatory spontaneous synaptic currents in neurons                                                                                | 1 |
| <i>DISC1</i>         | 612 | Decreased density of SV2+ synaptic boutons in neurons                                                                                                     | 1 |
| <i>DISC1</i>         | 613 | Decreased depolarization-induced vesicle release in neurons                                                                                               | 1 |
| <i>HTT</i>           | 614 | Decreased neurite-like processes length in neurons after treatment with isoxazole-9                                                                       | 3 |
| <i>HTT</i>           | 615 | Decreased nuclear:cytoplasmic ratio of endogenous Ran in neurons                                                                                          | 2 |
| <i>HTT</i>           | 616 | Decreased nuclear:cytoplasmic ratio of endogenous RanGAP1 in neurons                                                                                      | 2 |
| <i>HTT</i>           | 617 | Decreased nuclear:cytoplasmic ratio of endogenous NUP62 in neurons                                                                                        | 2 |
| <i>C9ORF72</i>       | 618 | Decreased velocity of actin movement in axonal growth cones of motor neurons                                                                              | 1 |
| <i>DHCR7</i>         | 619 | Decreased cholesterol levels in iPSCs after exposure to cholesterol-deficient mTesR1 medium                                                               | 3 |
| <i>DHCR7</i>         | 620 | Decreased rosette formation in iPSCs                                                                                                                      | 2 |
| <i>DHCR7</i>         | 621 | Decreased formation of secondary filaments in iPSCs cultured in cholesterol-deficient mTesR1 medium after treatment with LDL                              | 1 |
| <i>HTT</i>           | 622 | Decreased medium spiny neuronal death after treatment with KD3010 (PPAR- $\delta$ agonist)                                                                | 2 |
| <i>hnRNPA2B1</i>     | 623 | Decreased SRSF7 levels in motor neurons after treatment with an ASO targeting Hnrnpa2b1                                                                   | 1 |

|               |     |                                                                                                                |   |
|---------------|-----|----------------------------------------------------------------------------------------------------------------|---|
| <i>VCP</i>    | 623 | Decreased SRSF7 levels in motor neurons after treatment with an ASO targeting Hnrnpa2b1                        | 1 |
| <i>PANK2</i>  | 624 | Decreased average maximal firing rate in neurons                                                               | 2 |
| <i>PANK2</i>  | 625 | Decreased peak amplitudes of voltage-dependent Na <sup>+</sup> currents in neurons                             | 2 |
| <i>PANK2</i>  | 626 | Decreased mitochondrial membrane potential in neurons                                                          | 2 |
| <i>PANK2</i>  | 627 | Decreased glutathione levels in neurons                                                                        | 2 |
| <i>PANK2</i>  | 628 | Decreased aconitase activity in neurons                                                                        | 2 |
| <i>PANK2</i>  | 629 | Decreased heme levels in NSCs                                                                                  | 2 |
| <i>PANK2</i>  | 630 | Decreased ferritin levels in neurons                                                                           | 2 |
| <i>PANK2</i>  | 631 | Decreased loss of neurons after treatment with CoA                                                             | 2 |
| <i>PANK2</i>  | 632 | Decreased ROS levels in neurons after treatment with CoA                                                       | 2 |
| <i>MAPT</i>   | 633 | Decreased cell viability of neurons after exposure to piericidin A                                             | 1 |
| <i>MAPT</i>   | 634 | Decreased cell viability of neurons after exposure to glutamate                                                | 1 |
| <i>MAPT</i>   | 635 | Decreased cell viability of neurons after exposure to NMDA                                                     | 1 |
| <i>MAPT</i>   | 636 | Decreased cell viability of neurons after exposure to MG132                                                    | 1 |
| <i>MAPT</i>   | 637 | Decreased cell viability of neurons after exposure to epoxomicin                                               | 1 |
| <i>MAPT</i>   | 638 | Decreased cell viability of neurons after exposure to A $\beta$ (1–42)                                         | 1 |
| <i>GBA1</i>   | 639 | Decreased protein levels of Glucocerebrosidase (Gcase) in NSCs                                                 | 2 |
| <i>GBA1</i>   | 640 | Decreased activity levels of Glucocerebrosidase (Gcase) in NSCs                                                | 2 |
| <i>GBA1</i>   | 641 | Decreased protein levels of Glucocerebrosidase (Gcase) in dopaminergic neurons                                 | 2 |
| <i>GBA1</i>   | 642 | Decreased activity levels of Glucocerebrosidase (Gcase) in dopaminergic neurons                                | 2 |
| <i>GBA1</i>   | 643 | Decreased intracellular levels of dopamine in dopaminergic neurons                                             | 2 |
| <i>GBA1</i>   | 644 | Decreased levels of DAT1 mRNA in dopaminergic neurons                                                          | 1 |
| <i>GBA1</i>   | 645 | Decreased levels of VMAT2 mRNA in dopaminergic neurons                                                         | 1 |
| <i>GBA1</i>   | 646 | Decreased dopamine reuptake in dopaminergic neurons                                                            | 1 |
| <i>GBA1</i>   | 647 | Decreased levels of lysosomal GlcSph in dopaminergic neurons after treatment with NCGC607                      | 1 |
| <i>GBA1</i>   | 648 | Decreased levels of $\alpha$ -synuclein in dopaminergic neurons after treatment with NCGC607                   | 1 |
| <i>GBA1</i>   | 649 | Decreased levels of colocalized $\alpha$ -synuclein/Lamp2 in dopaminergic neurons after treatment with NCGC607 | 1 |
| <i>VPS13A</i> | 650 | Decreased voltage dependence of Na <sup>+</sup> channel activation in medium spiny neurons                     | 2 |
| <i>VPS13A</i> | 651 | Decreased frequency of synaptic currents in medium spiny neurons after treatment with phallacin                | 2 |
| <i>VPS13A</i> | 652 | Decreased amplitude of synaptic currents in medium spiny neurons after treatment with phallacin                | 2 |
| <i>VPS13A</i> | 653 | Decreased amplitude of action potentials in medium spiny neurons after treatment with phallacin                | 2 |
| <i>VPS13A</i> | 654 | Decreased frequency of synaptic currents in medium spiny neurons                                               | 2 |

|               |     |                                                                                                                  |   |
|---------------|-----|------------------------------------------------------------------------------------------------------------------|---|
|               |     | after treatment with PP2 (Src kinase inhibitor)                                                                  |   |
| <i>VPS13A</i> | 655 | Decreased amplitude of synaptic currents in medium spiny neurons after treatment with PP2 (Src kinase inhibitor) | 2 |
| <i>VPS13A</i> | 656 | Decreased amplitude of action potentials in medium spiny neurons after treatment with PP2 (Src kinase inhibitor) | 2 |
| <i>VPS13A</i> | 657 | Decreased number of medium spiny neurons at time of late differentiation                                         | 2 |
| <i>NPC1</i>   | 658 | Decreased levels of GM3 in neurons                                                                               | 2 |
| <i>NPC1</i>   | 659 | Decreased Hex A enzymatic activity in neurons                                                                    | 2 |
| <i>MAPT</i>   | 660 | Decreased nucleus/cytoplasm ratio in astrocytes                                                                  | 1 |
| <i>ERCC6</i>  | 661 | Decreased synaptic density in neurons                                                                            | 1 |
| <i>ERCC6</i>  | 662 | Decreased action potential spike number in neurons                                                               | 1 |
| <i>ERCC6</i>  | 663 | Decreased number of synchronized events in neurons                                                               | 1 |

Appendix Table S11. Localization of Gene Expression in Human Brain of Dysregulated Genes from GEO Datasets

| Gene     | Disease             | Cell Type | Defect  |          | Localization of Gene Expression in Adult Human Brain |                        | Localization of Gene Expression in Prenatal Human Brain |         |
|----------|---------------------|-----------|---------|----------|------------------------------------------------------|------------------------|---------------------------------------------------------|---------|
|          |                     |           | log(FC) | P-Value  | Up                                                   | Down                   | Up                                                      | Down    |
| AASS     | Friedreich's Ataxia | iPSCs     | 2.04    | 1.55E-05 | CbN, CC, GP, MY, VT                                  | CbCx, Cx, DG           | SVZ                                                     | CP      |
| COL1A1   | Friedreich's Ataxia | iPSCs     | -2.09   | 5.17E-04 | CGS, DT, LV, Str                                     | CbCx, Cx, HTM          | SVZ                                                     | CP      |
| DLK1     | Friedreich's Ataxia | iPSCs     | -2.95   | 6.76E-04 | HTM, MTg, MY, Pons                                   | Cx, DT, LV             |                                                         |         |
| FABP5    | Friedreich's Ataxia | iPSCs     | 2.35    | 7.55E-06 | CGS, ET, LV                                          | Cl, Cx, DT             | SVZ                                                     | CP      |
| FLRT3    | Friedreich's Ataxia | iPSCs     | -2.29   | 2.08E-02 | CbCx, Cx, DG                                         | AMG, BG, MTg, MY, Pons |                                                         | IZ      |
| FOXA2    | Friedreich's Ataxia | iPSCs     | -2.15   | 4.06E-02 | CbN, CC, GP, MY, Pons, VT                            | CbCx, ET, HPC          | CP                                                      | SVZ     |
| GDF15    | Friedreich's Ataxia | iPSCs     | -2.73   | 1.16E-06 | LV                                                   | Cx                     | IZ                                                      | SVZ     |
| IER3     | Friedreich's Ataxia | iPSCs     | -2.17   | 7.55E-05 | LV, Str                                              | CbCx, DG, DT           | CP                                                      | SVZ     |
| IGFBP6   | Friedreich's Ataxia | iPSCs     | -2.13   | 1.93E-03 | CbN, Pons                                            | AMG, CbCx, CC, HPC     |                                                         | SVZ     |
| IGFBP7   | Friedreich's Ataxia | iPSCs     | -2.02   | 1.53E-04 | CbN, BG, MY, LV                                      | AMG, CbCx, HPC         | IZ                                                      | CP      |
| KIAA1551 | Friedreich's Ataxia | iPSCs     | 2.09    | 4.16E-06 | CbCx, CC, GP                                         | HPC, HTM, MTg, Pons    |                                                         |         |
| PHLDA1   | Friedreich's Ataxia | iPSCs     | -2.40   | 8.43E-06 | MTg, Pons, Str, VT                                   | CbCx, CGS, HPC, LV     | SVZ                                                     | CP      |
| PROS1    | Friedreich's Ataxia | iPSCs     | -2.78   | 5.59E-04 | CGS, HPC, LV                                         | CbCx                   | SVZ                                                     | CP      |
| TDGF1    | Friedreich's Ataxia | iPSCs     | 2.25    | 7.01E-06 | CGS, DT, Pons, VT                                    | AMG, HTM, LV           | IZ                                                      | CP      |
| TM4SF18  | Friedreich's Ataxia | iPSCs     | -2.07   | 2.33E-03 | CbN, DT, MY                                          | CbCx, CGS, DG          | IZ                                                      | CP      |
| TTR      | Friedreich's Ataxia | iPSCs     | -2.80   | 1.44E-02 | CC, Str                                              | CbN, Cx                | SVZ                                                     | CP      |
| TXNL1    | Friedreich's Ataxia | iPSCs     | 2.01    | 3.83E-06 | HPC, MY, Pons                                        | CbCx, CxN              | CP                                                      |         |
| WDR11    | Friedreich's Ataxia | iPSCs     | 2.20    | 1.78E-05 | CbCx, CGS                                            | AMG, CbN, HPC, MTg     |                                                         | IZ      |
| ZFP42    | Friedreich's Ataxia | iPSCs     | 3.22    | 6.96E-03 | MY                                                   | HTM                    | SVZ                                                     |         |
| BNIP3    | Cockayne Syndrome   | iPSCs     | 2.05    | 1.29E-08 | DT, HPC, MY                                          | BG, CbCx, HTM, LV      | IZ                                                      | SVZ     |
| CST1     | Cockayne Syndrome   | iPSCs     | 3.41    | 1.67E-04 | AMG, MTg, Pons                                       | CGS, DG, HTM, LV       | IZ                                                      | SVZ     |
| CXCR4    | Cockayne Syndrome   | iPSCs     | 2.12    | 1.52E-08 | CbN, CC, GP, MTg, MY                                 | CbCx, Cx, HPC          | SVZ                                                     | CP      |
| CYP26A1  | Cockayne Syndrome   | iPSCs     | 2.11    | 2.29E-07 | Cx                                                   | CbCx, DG, HTM, MTg, TH | CP, IZ                                                  | SVZ     |
| GCNT4    | Cockayne Syndrome   | iPSCs     | -2.83   | 4.05E-08 | Cl, Cx                                               | Cb, HPC, HTM, MTg, TH  | SVZ                                                     |         |
| NLRP2    | Cockayne Syndrome   | iPSCs     | 3.38    | 1.25E-09 | CbN, HTM, PL                                         | CbCx, CC, GP           | CP                                                      | SVZ     |
| PRTG     | Cockayne Syndrome   | iPSCs     | 2.57    | 1.11E-07 | CbN, HTM, MTg, MY, Pons                              | CbCx, Cx, DG, Str      | IZ                                                      | SVZ     |
| TXNIP    | Cockayne Syndrome   | iPSCs     | 2.42    | 1.09E-04 | CC, GP, MTg, MY, VT                                  | HPC, HTM               | SVZ                                                     |         |
| WLS      | Cockayne Syndrome   | iPSCs     | 2.01    | 6.80E-06 | CGS, DT, HTM, LV                                     | CbCx, DG               | SVZ                                                     | CP      |
| ABL1     | Parkinson's         | iPSCs     | -2.05   | 4.98E-02 | BG, CC, TH                                           | Cb                     | IZ                                                      |         |
| BNC1     | Parkinson's         | iPSCs     | 4.23    | 3.14E-02 |                                                      | CGS, DT, HTM, LV       |                                                         |         |
| CCNL2    | Parkinson's         | iPSCs     | -3.66   | 1.86E-02 | CbCx, CC, LV                                         | HTM, MTg, Pons         | CP                                                      | SVZ     |
| CHRNA7   | Parkinson's         | iPSCs     | 2.40    | 1.46E-02 | HTM, Pons, VT                                        | CbCx, CC               |                                                         | SVZ     |
| CPNE4    | Parkinson's         | iPSCs     | -2.09   | 1.37E-02 | Cl, DT, HPC                                          | CbCx, CC, LV           | CP                                                      | IZ, SVZ |
| CRMP1    | Parkinson's         | iPSCs     | -2.26   | 4.13E-02 | AMG, HPC                                             | CbN, CC, CGS, GP, LV   | CP                                                      | SVZ     |
| DLGAP2   | Parkinson's         | iPSCs     | -3.29   | 2.72E-02 | BG, Cx, HPC                                          | CbCx, CC, DT, LV       | CP                                                      | SVZ     |
| DLL1     | Parkinson's         | iPSCs     | 2.32    | 1.30E-02 | BG, DT, MY                                           | Cb, DG                 | SVZ                                                     | CP      |
| FOXC1    | Parkinson's         | iPSCs     | 3.10    | 1.06E-02 | Pons, MY, LV, TH                                     | Cb, DG                 |                                                         | CP      |
| G0S2     | Parkinson's         | iPSCs     | -2.33   | 3.86E-02 | BG, CbN, MTg                                         | CC, HPC                | IZ                                                      | SVZ     |
| GLI2     | Parkinson's         | iPSCs     | 2.99    | 1.60E-02 | AMG, BG, CGS                                         | Cb, HPC                | SVZ                                                     | CP      |
| GREM1    | Parkinson's         | iPSCs     | 2.48    | 1.68E-04 | CC, GP, VT                                           | Cb, DG, HTM            |                                                         | SVZ     |
| GRIK2    | Parkinson's         | iPSCs     | -5.07   | 2.02E-02 | AMG, CbCx, DG                                        | CbN, CC, DT, GP, MTg   |                                                         | SVZ     |
| GRIN2B   | Parkinson's         | iPSCs     | -2.56   | 3.46E-02 | Cx, HPC, TH                                          | Cb, CC, HTM, MTg, Pons | CP, IZ                                                  | SVZ     |



|         |             |         |        |          |                      |                         |         |         |
|---------|-------------|---------|--------|----------|----------------------|-------------------------|---------|---------|
| GRIN3B  | Parkinson's | iPSCs   | -2.15  | 3.87E-02 | CC, GP               | AMG, MTg                | CP      | SVZ     |
| HES1    | Parkinson's | iPSCs   | 2.41   | 1.30E-02 | BG, CC, DT           | Pons                    | SVZ     | CP      |
| HES5    | Parkinson's | iPSCs   | 2.90   | 1.20E-02 | AMG, HTM, Str        | CGS, CbN, DG, LV, Pons  | SVZ     | CP, IZ  |
| HOXA2   | Parkinson's | iPSCs   | 2.11   | 1.38E-02 | MY, Pons             | CC, LV                  |         |         |
| HOXA9   | Parkinson's | iPSCs   | -2.70  | 2.76E-05 | CGS, MTg, MY         | CC, DG, DTH, FL         | IZ      |         |
| HOXB5   | Parkinson's | iPSCs   | -2.26  | 1.40E-02 | HTM, MY, Pons        | Cb, DTH, FL             |         | SVZ     |
| HOXC8   | Parkinson's | iPSCs   | -5.80  | 1.37E-02 | AMG, CbN, HTM, MY    | CGS, BG, DG             | IZ      | SVZ     |
| HSPA1A  | Parkinson's | iPSCs   | -2.85  | 1.30E-02 | CbN, CC, GP, MTg, VT | AMG, CbCx, Cx, HPC      | SVZ     | CP      |
| KCNC1   | Parkinson's | iPSCs   | -2.30  | 3.34E-02 | CbCx, DT, GP, OL, PL | AMG, CC, HPC, HTM, MY   |         | SVZ     |
| LFNG    | Parkinson's | iPSCs   | 2.61   | 1.64E-02 | GP, MTg, MY          | HPC, OL, PL, TL         | SVZ     | CP      |
| LMO3    | Parkinson's | iPSCs   | -3.88  | 2.67E-02 | AMG, BG, CI, Cx, DG  | CbCx, HTM, LV, TH       | CP      | SVZ     |
| MT3     | Parkinson's | iPSCs   | -2.07  | 2.17E-02 | AMG, Cx, GP, MTg     | CbCx, CGS, HPC, HTM, LV |         | CP      |
| NEB     | Parkinson's | iPSCs   | -2.12  | 2.70E-02 | CGS, BG, HTM         | AMG, HPC, MTg, Pons     |         |         |
| NHLH2   | Parkinson's | iPSCs   | -3.64  | 1.30E-02 | CbCx, DT, HPC, Pons  | CbN, CC, Cx, LV         |         | SVZ     |
| NOTCH2  | Parkinson's | iPSCs   | 5.30   | 3.41E-02 | BG, CGS, CxN         | Cb                      | SVZ     | CP      |
| ONECUT1 | Parkinson's | iPSCs   | -2.20  | 3.44E-02 | GP, MTg, MY, Pons    | CC, Cx, DT, LV, Str     |         | SVZ     |
| PARM1   | Parkinson's | iPSCs   | 2.54   | 1.38E-02 | Cx, DG, Pons         | Cb, CC                  | IZ      | SVZ     |
| PDGFD   | Parkinson's | iPSCs   | 2.43   | 1.72E-02 | HTM, MTg, Pons       | CC, Cb, TH              | SVZ     | CP      |
| PER2    | Parkinson's | iPSCs   | 2.08   | 1.82E-02 | CbCx, Cx             | DT, HTM, MTg, MY, Pons  | IZ      | CP      |
| POSTN   | Parkinson's | iPSCs   | 2.33   | 1.74E-02 | AMG, DG              | TH                      | IZ      | SVZ     |
| PPP1R8  | Parkinson's | iPSCs   | -3.33  | 2.85E-02 | GP, MTg, MY, VT      | CbCx, Cx, HPC           | CP, SVZ | IZ      |
| ROR1    | Parkinson's | iPSCs   | 2.49   | 1.62E-02 | Cb                   | HPC                     | SVZ     | CP      |
| RUNX3   | Parkinson's | iPSCs   | 2.13   | 1.58E-02 | AMG, MY, VT          | Cb, HTM                 | IZ      | CP, SVZ |
| SNAI2   | Parkinson's | iPSCs   | 2.23   | 4.85E-02 | Cb                   | HTM                     | CP      | SVZ     |
| SOSTDC1 | Parkinson's | iPSCs   | 2.31   | 1.96E-02 | Cx, LV               | Cb, DT, HTM, MY, Str    | CP      | SVZ     |
| TGFB3   | Parkinson's | iPSCs   | 2.81   | 1.40E-02 | CC, GP, VT           | HPC, HTM                |         | CP      |
| TWIST2  | Parkinson's | iPSCs   | 2.81   | 1.42E-02 | AMG, FL, MY          | BG, Cb, DG              |         | SVZ     |
| VSNL1   | Parkinson's | iPSCs   | -4.38  | 1.30E-02 |                      | CC, CxN                 |         | SVZ     |
| WWOX    | Parkinson's | iPSCs   | -2.48  | 4.28E-02 | Cb, CGS              | HPC                     | SVZ     | CP, IZ  |
| ZEB1    | Parkinson's | iPSCs   | 2.15   | 1.18E-02 | CGS, DT, MY, Pons    | Cb, CI, HPC             | IZ, SVZ | CP      |
| ZEB2    | Parkinson's | iPSCs   | 2.55   | 1.72E-02 | CC, GP, HPC, MY, VT  | Cb, HTM, LV             | CP, IZ  |         |
| ZIC2    | Parkinson's | iPSCs   | 2.46   | 1.37E-02 | CbCx, DT, LV         | Cx, DG, HTM, MTg, Pons  |         | CP      |
| ZNF254  | Parkinson's | iPSCs   | 4.04   | 1.93E-02 | AMG, CbCx, DG        | CbN, Cx, HTM, Pons      |         | SVZ     |
| AGPS    | Parkinson's | Neurons | 2.06   | 1.95E-02 | MTg, VT              | BG, HPC                 |         | SVZ     |
| SUV39H1 | Parkinson's | Neurons | -2.29  | 1.95E-02 | Cb, FL               | MY, LV                  | SVZ     | CP      |
| ACTC1   | Parkinson's | NSCs    | -2.323 | 3.28E-05 | HPC                  | Cb                      | SVZ     | CP      |
| ADM     | Parkinson's | NSCs    | -2.129 | 3.36E-06 | MY, Pons             | Cb                      | IZ      | CP, SVZ |
| ANKRD1  | Parkinson's | NSCs    | -2.98  | 1.89E-06 |                      |                         | CP      | SVZ     |
| ANXA3   | Parkinson's | NSCs    | -3.407 | 1.58E-06 | HTM, Pons            | AMG, Cb, HPC            | SVZ     | CP, IZ  |
| BDNF    | Parkinson's | NSCs    | -2.194 | 4.04E-05 | CbCx, DG             | CC, GP                  | IZ      | SVZ     |
| CAV2    | Parkinson's | NSCs    | -2.569 | 5.58E-06 | CbN, DT              | CbCx, DG                | CP      | IZ, SVZ |
| CDH6    | Parkinson's | NSCs    | -2.843 | 1.58E-06 | CbCx, DG             | DT, GP                  | CP      | IZ      |
| COL1A2  | Parkinson's | NSCs    | 2.999  | 1.49E-06 | CbN, CGS, HTM        | CbCx, Cx                |         | CP      |
| COLEC12 | Parkinson's | NSCs    | -2.216 | 4.70E-06 | CbN, CGS, LV, MTg    | Cx, CbCx, DG            |         | CP      |
| CRHBP   | Parkinson's | NSCs    | -3.094 | 4.86E-05 | HTM                  | CbCx                    | IZ      | CP      |
| DIAPH2  | Parkinson's | NSCs    | -2.382 | 2.86E-05 | AMG, DG, GP, LV      | CbCx                    | SVZ     | CP      |
| EDNRB   | Parkinson's | NSCs    | 2.31   | 6.13E-06 | AMG, HTM, MY, TH     | CbCx, Cx, HPC           | SVZ     | CP      |
| EFEMP1  | Parkinson's | NSCs    | -2.669 | 2.84E-06 | CGS, ET, GP          | CbCx, HPC               | SVZ     | CP, IZ  |

|          |             |      |        |          |                             |                            |         |         |
|----------|-------------|------|--------|----------|-----------------------------|----------------------------|---------|---------|
| EMP1     | Parkinson's | NSCs | -3.5   | 1.58E-06 | CbN, ET                     | CbCx, DG                   | IZ      | CP      |
| EPHA3    | Parkinson's | NSCs | 3.588  | 2.44E-06 | Cx, TH                      | AMG, Cb, CC, HPC, LV       | CP, IZ  |         |
| FABP3    | Parkinson's | NSCs | -2.063 | 4.70E-06 | HPC                         | Cb, CC, CGS, ET, LV        | CP      | SVZ     |
| FOXA2    | Parkinson's | NSCs | -3.314 | 1.05E-06 | CbN, CC, GP, Pons, VT       | CbCx, CGS                  | CP      | SVZ     |
| FRZB     | Parkinson's | NSCs | 3.605  | 3.62E-06 | CbN, GP, LV, MY, Pons       | CbCx, DG                   | CP      | IZ      |
| FZD10    | Parkinson's | NSCs | 2.84   | 1.15E-06 | VT                          | Cx, DG, HTM                | CP, SVZ |         |
| GABBR1   | Parkinson's | NSCs | -4.145 | 1.05E-06 | AMG, DT                     | CbN, CC, Pons, LV, MY      |         | SVZ     |
| GABRA5   | Parkinson's | NSCs | -3.424 | 1.44E-05 | CI, Cx, HPC, DT             | Cb, MY                     | SVZ     | CP, IZ  |
| GAS1     | Parkinson's | NSCs | 2.413  | 3.21E-06 | CC                          | HPC, HTM, Pons             | SVZ     |         |
| GLIPR1   | Parkinson's | NSCs | -2.483 | 4.95E-06 |                             |                            | SVZ     | CP      |
| GPR183   | Parkinson's | NSCs | -2.579 | 4.91E-05 | CbN, CC, CGS, ET, GP        | CbCx, DG                   |         |         |
| HAS2     | Parkinson's | NSCs | -2.258 | 2.86E-05 | ET                          |                            | CP, SVZ | IZ      |
| HNMT     | Parkinson's | NSCs | -2.466 | 1.33E-05 | CGS, ET, GP, MTg            | CbCx, DT                   | CP, SVZ | SVZ     |
| IGFBP3   | Parkinson's | NSCs | -4.274 | 3.48E-07 | HPC, HTM                    | CbCx, GP                   |         | SVZ     |
| IGFBP5   | Parkinson's | NSCs | -2.406 | 2.91E-05 | AMG, CC, CGS, VT            | DT, HTM, Pons              | IZ      | CP, SVZ |
| KAL1     | Parkinson's | NSCs | 4.769  | 3.48E-07 | AMG, HTM, Pons              | Cb                         |         | CP      |
| KCND3    | Parkinson's | NSCs | -2.207 | 1.43E-05 | CbCx, DG, MTg               | CC, CGS, ET, HTM, LV, Pons | CP, IZ  |         |
| LAMB1    | Parkinson's | NSCs | -2.027 | 7.90E-06 | AMG, CbCx, DT, LV           | CbN, CC, GP, MTg, Pons     | IZ      | SVZ     |
| LAMP3    | Parkinson's | NSCs | -2.004 | 5.23E-06 |                             |                            |         | SVZ     |
| LGR5     | Parkinson's | NSCs | 2.776  | 4.86E-05 | AMG, CbN, CC, MTg, Pons, VT | CbCx, Cx, HPC, LV          | IZ      | SVZ     |
| MATN2    | Parkinson's | NSCs | -2.186 | 9.65E-06 | AMG, CGS, GP, MTg, VT       | CbCx, Cx, HPC              | CP, SVZ |         |
| ME1      | Parkinson's | NSCs | -2.141 | 4.70E-06 | Pons                        | CbCx                       | CP, IZ  |         |
| MEOX1    | Parkinson's | NSCs | -2.564 | 8.03E-06 |                             |                            | IZ      | SVZ     |
| NID2     | Parkinson's | NSCs | -2.698 | 1.05E-06 | CC, CGS, LV, VT             | CbCx, DG, HTM              | IZ      | CP      |
| NKX2-2   | Parkinson's | NSCs | -3.738 | 8.74E-07 | CbN, CC, GP, MY, Pons, VT   | CbCx, Cx, HTM, LV          | IZ      | CP, SVZ |
| NMU      | Parkinson's | NSCs | 2.074  | 6.46E-06 | Cx, DT                      | AMG, CbCx, CC, HPC         | IZ      | CP      |
| NPPB     | Parkinson's | NSCs | -2.054 | 2.35E-05 | AMG, GP                     | Cx                         | SVZ     | CP, IZ  |
| NR2E1    | Parkinson's | NSCs | 2.023  | 9.37E-06 | AMG                         | Cb, Pons, MY               | IZ      | CP, SVZ |
| NRP1     | Parkinson's | NSCs | -2.434 | 4.79E-05 | HPC                         | CbCx                       | IZ      | CP      |
| OLFML3   | Parkinson's | NSCs | -2.983 | 9.55E-06 | CbN, CC, GP                 | CbCx, DG, HTM              | IZ      | CP      |
| PAPSS2   | Parkinson's | NSCs | -2.38  | 3.60E-06 | CbN, Cx, GP                 | CbCx, HPC, HTM             | IZ      | CP      |
| PAX6     | Parkinson's | NSCs | 4.041  | 8.94E-07 | CbCx                        | DT                         | SVZ     | CP, IZ  |
| PHLDA2   | Parkinson's | NSCs | -3.111 | 1.89E-06 |                             | CbCx, GP, HPC              | SVZ     | IZ      |
| PLAU     | Parkinson's | NSCs | -2.14  | 2.69E-06 | MY                          | CbCx                       |         | SVZ     |
| PLOD2    | Parkinson's | NSCs | -2.234 | 5.48E-05 | ET, GP                      | CbCx, DT, HPC              | SVZ     | CP      |
| PLP1     | Parkinson's | NSCs | 2.245  | 1.65E-05 | CbN, CC, ET, GP, MY, Pons   | CbCx, Cx, DG, DT           |         | CP      |
| PRDM13   | Parkinson's | NSCs | 3      | 2.96E-06 | CGS, HTM                    |                            | IZ, SVZ | CP      |
| PTGER4   | Parkinson's | NSCs | -2.252 | 2.55E-05 | AMG, MY                     | CbCx, DT                   | SVZ     | CP      |
| RGS1     | Parkinson's | NSCs | -3.293 | 2.09E-06 | CbN, CC, CGS, ET, GP        | CbCx, Cx, DG               | IZ, SVZ | CP      |
| SEPP1    | Parkinson's | NSCs | -3.071 | 2.69E-06 | CbN, CC, GP, MTg, Pons, VT  | CbCx, HPC, HTM             | SVZ     | CP      |
| SERPINF1 | Parkinson's | NSCs | -3.03  | 5.58E-06 | Cx, DT, LV                  | CbCx, GP, Pons             | CP      | IZ      |
| SLIT3    | Parkinson's | NSCs | -2.123 | 1.09E-05 | AMG, CbCx, HPC              | CC, HTM, MTg               |         | CP, SVZ |
| SPP1     | Parkinson's | NSCs | -3.577 | 2.69E-06 | CbN, CC, GP, Pons, MY, TH   | CbCx, Cx                   | IZ, SVZ | CP      |
| STC2     | Parkinson's | NSCs | -2.903 | 5.32E-06 | HPC, DT                     | HTM                        | IZ      |         |
| TFAP2B   | Parkinson's | NSCs | 3.067  | 1.70E-06 | CbCx                        |                            | IZ      | CP      |
| TFF3     | Parkinson's | NSCs | -2.351 | 5.35E-06 | DT                          |                            | IZ      | CP      |

|          |               |         |        |          |                        |                         |         |        |
|----------|---------------|---------|--------|----------|------------------------|-------------------------|---------|--------|
| TFPI     | Parkinson's   | NSCs    | -2.203 | 5.06E-05 | CbN, MY                | CbCx, DG                | SVZ     | CP     |
| TFPI2    | Parkinson's   | NSCs    | -2.113 | 1.82E-05 | DT, MY                 | CbCx, Cx                | IZ, SVZ | CP     |
| TMEM100  | Parkinson's   | NSCs    | -2.249 | 2.69E-06 | AMG, HTM               | CbCx                    |         | CP     |
| UBD      | Parkinson's   | NSCs    | -4.145 | 1.05E-06 | LV                     |                         | CP, SVZ |        |
| ADAMTS12 | Schizophrenia | Neurons | -4.15  | 5.67E-19 | DT, MY                 | DG                      | SVZ     | CP     |
| ARRDC4   | Schizophrenia | Neurons | 3.90   | 3.41E-18 | CC, ET, HPC, MY        | CbCx, Cx                | IZ      | CP     |
| ATP1A2   | Schizophrenia | Neurons | -2.87  | 1.01E-08 | GP, MTg, MY, Pons      | CbCx, DG, LV            | SVZ     | CP     |
| BCAM     | Schizophrenia | Neurons | -2.21  | 1.62E-10 | CbN, MTg, MY, Pons     | CbCx, FL                | IZ      | SVZ    |
| COL1A1   | Schizophrenia | Neurons | -2.44  | 4.75E-04 | CGS, DT, LV, Str       |                         | SVZ     | CP     |
| COL3A1   | Schizophrenia | Neurons | -4.75  | 1.94E-16 | LV, MY                 | CbCx, Cx, DG, DT        | IZ      | CP     |
| COL6A3   | Schizophrenia | Neurons | -2.11  | 2.51E-06 | HPC, LV                |                         | IZ      | SVZ    |
| CYP26B1  | Schizophrenia | Neurons | 2.44   | 5.11E-04 | AMG, CbCx              | DG, HTM, MTg, MY, TH    |         | SVZ    |
| DCT      | Schizophrenia | Neurons | -4.49  | 8.04E-13 | Cx, Str                | Cb, CC                  | SVZ     |        |
| EBF1     | Schizophrenia | Neurons | 3.52   | 6.09E-14 | CbCx, MY               | Cx, DG                  |         | CP     |
| EFEMP2   | Schizophrenia | Neurons | 2.19   | 5.15E-05 | GP, LV                 | HPC, MTg, Pons          | SVZ     | CP     |
| ELN      | Schizophrenia | Neurons | -2.59  | 3.83E-12 | Cb, CGS, ET, LV        | HPC, PL, TH             |         | CP     |
| FBLN2    | Schizophrenia | Neurons | -3.23  | 1.82E-14 | AMG, CbN, LV           | Cb                      |         | CP     |
| FBN1     | Schizophrenia | Neurons | -2.84  | 1.38E-23 | MY                     | Cb, HPC                 | SVZ     | CP     |
| FBN2     | Schizophrenia | Neurons | -3.87  | 1.82E-16 | DT, MTg                |                         | SVZ     | CP     |
| FEZF1    | Schizophrenia | Neurons | -2.40  | 9.71E-11 | AMG, HTM, MTg          |                         | SVZ     |        |
| IL17RB   | Schizophrenia | Neurons | 2.05   | 1.23E-04 | CbCx, GP               | Cx, HPC, MY, Pons       |         | CP     |
| KCNAB3   | Schizophrenia | Neurons | 2.24   | 1.14E-04 | Cb, OL                 | HB, HPC, HTM            | IZ, SVZ | CP     |
| KDM5D    | Schizophrenia | Neurons | 5.74   | 1.53E-07 | CbCx, CC, LV           | AMG, DG, HTM, Pons      |         |        |
| LAMA2    | Schizophrenia | Neurons | -4.25  | 2.32E-18 | CGS, GP, MTg           | AMG, HPC                |         | SVZ    |
| LAMB2    | Schizophrenia | Neurons | -2.29  | 3.13E-09 | GP, MY, LV             | Cx, HPC, Pons           | SVZ     | CP     |
| LAMC1    | Schizophrenia | Neurons | -2.18  | 1.92E-09 | Cb                     | CC, DT                  | IZ, SVZ | CP     |
| LHX1     | Schizophrenia | Neurons | -4.44  | 2.77E-16 | CbCx                   | Cx, CC, HPC, Str        |         |        |
| LRRN1    | Schizophrenia | Neurons | -2.11  | 8.41E-14 | MY, Pons, Str          | Cb, Cx, LV              |         | CP     |
| MATN2    | Schizophrenia | Neurons | -3.21  | 1.19E-17 | AMG, CC, CGS, GP, MTg  | CbCx, Cx, HPC,          |         | CP     |
| NEDD4L   | Schizophrenia | Neurons | 2.21   | 1.24E-10 | HPC, Str               | CC, CGS, MTg            | SVZ     |        |
| NID2     | Schizophrenia | Neurons | -2.82  | 2.72E-10 | CC, CGS, GP, VT        | CbCx, DG, MTg           | IZ      | CP     |
| OTX2     | Schizophrenia | Neurons | -2.42  | 1.89E-16 | Cb, DT, LV, MTg        |                         | SVZ     |        |
| PRSS35   | Schizophrenia | Neurons | -4.63  | 3.74E-23 | AMG, BG, CI, FL        | Cb, LV, MTg, MY, Pons   | SVZ     | CP, IZ |
| RNASEL   | Schizophrenia | Neurons | 2.18   | 2.19E-04 | Pons, MY               | CbCx, DG                |         | CP     |
| RNF128   | Schizophrenia | Neurons | 3.17   | 1.27E-05 | HPC, HTM, MTg, Pons    | CbCx, CC, DT, LV        |         | SVZ    |
| RPL30    | Schizophrenia | Neurons | 2.05   | 1.14E-03 | CbCx, CC, GP           | Cx, DG, DT              | IZ      |        |
| RPL35A   | Schizophrenia | Neurons | 2.14   | 7.92E-04 | CbCx, CC, GP           | DT, HPC, MTg, Pons      | IZ      |        |
| RPS11    | Schizophrenia | Neurons | 2.06   | 8.62E-04 | CbCx, CC, GP           | DT, HPC, MTg, Pons      | IZ      |        |
| RPS19    | Schizophrenia | Neurons | 2.66   | 3.60E-04 | CbCx, CC, GP           | DT, HPC, MTg, Pons      | IZ      |        |
| RPS4Y1   | Schizophrenia | Neurons | 7.28   | 2.07E-07 | CbCx, CC, GP           | AMG, DT, HPC, MTg, Pons | IZ      |        |
| SCGN     | Schizophrenia | Neurons | 5.08   | 2.49E-07 | CbCx, HPC, HTM         | CbN, CC, Pons, Str, TH  | SVZ     |        |
| SERPING1 | Schizophrenia | Neurons | -2.27  | 9.21E-08 | ET, LV, MY             | CbCx, CC, HPC, MTg      | SVZ     |        |
| SERPINH1 | Schizophrenia | Neurons | -2.09  | 4.13E-10 | CbN, LV, MY, Pons      | HPC                     | SVZ     | CP     |
| SLA      | Schizophrenia | Neurons | 4.46   | 7.77E-10 | AMG, CbN, DG, MY, Pons | CbCx, HTM, MTg, PL      | CP, IZ  | SVZ    |
| SOCS2    | Schizophrenia | Neurons | 2.13   | 1.56E-04 | CI, HPC, LV            | AMG, Cb, CC, HTM, TH    | CP      |        |
| SULF1    | Schizophrenia | Neurons | -4.62  | 1.52E-26 | CGS, DT, HTM, LV, Pons | CbCx, HPC               |         |        |
| SULF2    | Schizophrenia | Neurons | -3.14  | 1.22E-27 | HPC, MY, Pons          | CbCx, DT, OL            | CP      | SVZ    |
| TCEAL2   | Schizophrenia | Neurons | 2.52   | 4.94E-05 | CGS, MY, Pons          | BG, CbCx, CC            | CP      | SVZ    |

|        |               |         |       |          |                    |                   |  |     |
|--------|---------------|---------|-------|----------|--------------------|-------------------|--|-----|
| TRIM58 | Schizophrenia | Neurons | 2.48  | 9.75E-04 | HTM, MTg, MY, Pons | CbCx, CC, HPC, LV |  | SVZ |
| MGP    | SMA           | Neurons | -2.63 | 1.53E-02 | CGS, LV, TL        | Cb, HPC           |  | CP  |

| Adult Brain Expression Abbreviations |                        | FL   | Frontal Lobe       | Adult Brain Legend     | Prenatal Brain Legend |                     |
|--------------------------------------|------------------------|------|--------------------|------------------------|-----------------------|---------------------|
| AMG                                  | Amygdala               | GP   | Globus Pallidus    | Telencephalon (Cortex) | CP                    | Cortical Plate      |
| BG                                   | Basal Ganglia          | HPC  | Hippocampus        |                        |                       |                     |
| Cb                                   | Cerebellum             | HTM  | Hypothalamus       | Telencephalon (Nuclei) | CP                    | Cortical Plate      |
| CbCx                                 | Cerebellar Cortex      | LV   | Lateral Ventricles |                        |                       |                     |
| CbN                                  | Cerebellar Nuclei      | MTg  | Midbrain Tegmentum | Diencephalon           | IZ                    | Intermediate Zone   |
| CC                                   | Corpus Callosum        | MY   | Myelencephalon     |                        |                       |                     |
| CGS                                  | Central Glia Substance | OL   | Occipital Lobe     | Metencephalon          | IZ                    | Intermediate Zone   |
| Cx                                   | Cerebral Cortex        | PL   | Parietal Lobe      |                        |                       |                     |
| CxN                                  | Cerebral Nuclei        | Pons | Pons               | Mesencephalon          | SVZ                   | Subventricular Zone |
| CI                                   | Clastrum               | Str  | Striatum           |                        |                       |                     |
| DG                                   | Dentate Gyrus          | TH   | Thalamus           | Myelencephalon         | SVZ                   | Subventricular Zone |
| DT                                   | Dorsal Thalamus        | TL   | Temporal Lobe      |                        |                       |                     |
| ET                                   | Epithalamus            | VT   | Ventral Thalamus   | Other Structures       | SVZ                   | Subventricular Zone |

Appendix Table S12. Proposed Minimal Information Checklist for iPSC Research Studies

| Suggested Minimal Information Categories                   | Checklist |   |     | Minimal Information Subcategories                                                                          | Description |
|------------------------------------------------------------|-----------|---|-----|------------------------------------------------------------------------------------------------------------|-------------|
| Study                                                      | ✓         | ✗ | N/A | Study title                                                                                                |             |
|                                                            | ✓         | ✗ | N/A | IRB approval date                                                                                          |             |
|                                                            | ✓         | ✗ | N/A | IRB affiliation                                                                                            |             |
|                                                            | ✓         | ✗ | N/A | Reference publication (PMID)                                                                               |             |
|                                                            | ✓         | ✗ | N/A | GEO ID                                                                                                     |             |
|                                                            | ✓         | ✗ | N/A | Platform ID                                                                                                |             |
|                                                            | ✓         | ✗ | N/A | Platform name                                                                                              |             |
| Clinical information of patients and source cell isolation | ✓         | ✗ | N/A | Age                                                                                                        |             |
|                                                            | ✓         | ✗ | N/A | Gender                                                                                                     |             |
|                                                            | ✓         | ✗ | N/A | Diagnosis                                                                                                  |             |
|                                                            | ✓         | ✗ | N/A | Source cell type (i.e fibroblast, lymphocyte, etc.)                                                        |             |
|                                                            | ✓         | ✗ | N/A | Standardized cell line name (Luong <i>et al.</i> 2011, Cell Stem Cell)                                     |             |
| Generation of iPSCs protocol                               | ✓         | ✗ | N/A | Reprogramming methodology                                                                                  |             |
|                                                            | ✓         | ✗ | N/A | Purity of cell population                                                                                  |             |
|                                                            | ✓         | ✗ | N/A | QC methodology for pluripotency                                                                            |             |
|                                                            | ✓         | ✗ | N/A | Karyotyping                                                                                                |             |
| Gene delivery methods for cells                            | ✓         | ✗ | N/A | Vector type                                                                                                |             |
|                                                            | ✓         | ✗ | N/A | Genes delivered                                                                                            |             |
| Differentiation of iPSCs to any cell type                  | ✓         | ✗ | N/A | Cell type(s)                                                                                               |             |
|                                                            | ✓         | ✗ | N/A | Differentiation protocol(s)                                                                                |             |
|                                                            | ✓         | ✗ | N/A | Purity of cell population(s)                                                                               |             |
|                                                            | ✓         | ✗ | N/A | QC method(s) for validation of differentiated cell type(s) (i.e. Gene marker(s), surface antigen(s), etc.) |             |
| Cell culture/maintenance                                   | ✓         | ✗ | N/A | Basal media used (specify by cell type(s))                                                                 |             |
|                                                            | ✓         | ✗ | N/A | Passage methodology                                                                                        |             |
|                                                            | ✓         | ✗ | N/A | No. of passage(s)                                                                                          |             |
|                                                            | ✓         | ✗ | N/A | Culture additive(s) and concentration(s)                                                                   |             |
|                                                            | ✓         | ✗ | N/A | % O <sub>2</sub>                                                                                           |             |
|                                                            | ✓         | ✗ | N/A | % CO <sub>2</sub>                                                                                          |             |
|                                                            | ✓         | ✗ | N/A | Culture temperature                                                                                        |             |

|                                                             |   |   |     |                                        |  |
|-------------------------------------------------------------|---|---|-----|----------------------------------------|--|
|                                                             | ✓ | ✗ | N/A | Validation methodology                 |  |
| Validation of the mutation being studied                    | ✓ | ✗ | N/A | Cell type(s) validated                 |  |
| Procedures of assays/<br>specific phenotypic search methods | ✓ | ✗ | N/A | Protocol(s) of phenotypic assay(s)     |  |
|                                                             | ✓ | ✗ | N/A | Gene expression profiling method(s)    |  |
|                                                             | ✓ | ✗ | N/A | Treatment(s) and concentration(s) used |  |
